# Supplementary material
Source: PubMed Central journal article supplement (PMC6052355)
Supplement: NIHMS977182-supplement--2.pdf [file NIHMS977182-supplement--2.pdf]

**Supporting Information (Section 2)**

**for**

**Do TFSA Anions Slither?**

**Pressure Exposes the Role of TFSA Conformational Exchange in Self-Diffusion**

Sophia N. Suarez,\* Armando Rua, David Cuffari, Kartik Pilar, Jasmine L. Hatcher,

Sharon Ramati and James F. Wishart\*

**Contents**

**Table S22.** Activation volumes from reported ionic self-diffusion coefficients and viscosities.

**Directory of fitted activation volume data**

**Plots of ionic diffusion constants versus pressure with tabulated data**

**Plots of  $\ln(\text{fluidity})$  (inverse viscosity) versus pressure with tabulated data**

**Table S22. Activation volumes from reported ionic self-diffusion coefficients and viscosities**

| IL /<br>Reference<br>for diffusion | Temperature<br>°C | $\Delta V^+(D^+)$<br>cm <sup>3</sup> /mol<br>or molec. vols. | error_ $\Delta V^+(D^+)$<br>cm <sup>3</sup> /mol | $\Delta V^+(D^-)$<br>cm <sup>3</sup> /mol<br>or molec. vols. | error_ $\Delta V^+(D^-)$<br>cm <sup>3</sup> /mol | $\Delta V^+(\text{fluidity})$<br>cm <sup>3</sup> /mol | Reference<br>for fluidity<br>or molec. vols. |
|------------------------------------|-------------------|--------------------------------------------------------------|--------------------------------------------------|--------------------------------------------------------------|--------------------------------------------------|-------------------------------------------------------|----------------------------------------------|
|                                    |                   | Blue = molecular volumes from Ref. 13                        |                                                  |                                                              |                                                  |                                                       |                                              |
| <b>EMIM TFSA</b>                   |                   | 70.2                                                         |                                                  | 95.6                                                         |                                                  |                                                       | Ref. 13                                      |
| This work                          | 22                | 14.6                                                         | 1.3                                              | 28.8                                                         | 2.5                                              |                                                       |                                              |
|                                    | 25                |                                                              |                                                  |                                                              |                                                  | 26.2 ± 0.7 (25)                                       | Ref. 4                                       |
|                                    | 50                |                                                              |                                                  |                                                              |                                                  | 25.7 ± 0.3 (50)                                       | Ref. 4                                       |
|                                    | 70                |                                                              |                                                  |                                                              |                                                  | 20.5 ± 0.1 (70)                                       | Ref. 4                                       |
| <b>BMIM TFSA</b>                   |                   | 90.6                                                         |                                                  | 95.6                                                         |                                                  |                                                       | Ref. 13                                      |
| This work                          | 22                | 19.2                                                         | 1.4                                              | 22.6                                                         | 2.7                                              |                                                       |                                              |
|                                    | 25                |                                                              |                                                  |                                                              |                                                  | 27.7 ± 0.2 (25)                                       | Ref. 5                                       |
|                                    | 50                |                                                              |                                                  |                                                              |                                                  | 23.7 ± 0.2 (50)                                       | Ref. 5                                       |
|                                    | 75                |                                                              |                                                  |                                                              |                                                  | 21.0 ± 0.3 (75)                                       | Ref. 5                                       |
| <b>EMIM FSA</b>                    |                   | 70.2                                                         |                                                  | 65.0                                                         |                                                  |                                                       | Ref. 13                                      |
| This work                          | 22                | 12.9                                                         | 0.9                                              | 11.0                                                         | 1.5                                              |                                                       |                                              |
| <b>EMIM BF<sub>4</sub></b>         |                   | 70.2                                                         |                                                  | 30.4                                                         |                                                  |                                                       | Ref. 13                                      |
|                                    | 20                |                                                              |                                                  |                                                              |                                                  | 24.7 ± 1.0 (20)                                       | Ref. 6                                       |
| This work                          | 22                | 14.0                                                         | 1.0                                              | 15.3                                                         | 1.4                                              |                                                       |                                              |
|                                    | 30                |                                                              |                                                  |                                                              |                                                  | 23.3 ± 0.9 (30)                                       | Ref. 6                                       |
| <b>BMIM BF<sub>4</sub></b>         |                   | 90.6                                                         |                                                  | 30.4                                                         |                                                  |                                                       | Ref. 13                                      |
|                                    |                   |                                                              |                                                  |                                                              |                                                  | 25.6 ± 0.9 (20)                                       | Ref. 6                                       |
| Ref. 1                             | 25                | 22.0                                                         | 0.4                                              | N/A                                                          | N/A                                              | 25.0 ± 0.1 (25)                                       | Ref. 7                                       |
| Ref. 1                             | 50                | 19.0                                                         | 0.2                                              | 18.9                                                         | 0.7                                              | 21.4 ± 0.2 (50)                                       | Ref. 7                                       |
| Ref. 1                             | 75                | 16.8                                                         | 0.1                                              | 17.0                                                         | 0.4                                              | 19.0 ± 0.2 (75)                                       | Ref. 7                                       |
| <b>HMIM BF<sub>4</sub></b>         |                   | 111.1                                                        |                                                  | 30.4                                                         |                                                  |                                                       | Ref. 13                                      |
|                                    | 22                |                                                              |                                                  |                                                              |                                                  | 32.6 ± 1.2 (22)                                       | Ref. 6                                       |
|                                    | 25                |                                                              |                                                  |                                                              |                                                  | 29.5 ± 0.6 (25)                                       | Ref. 4                                       |
|                                    | 50                |                                                              |                                                  |                                                              |                                                  | 23.2 ± 0.2 (50)                                       | Ref. 4                                       |
|                                    | 70                |                                                              |                                                  |                                                              |                                                  | 21.0 ± 0.2 (70)                                       | Ref. 4                                       |
| <b>OMIM BF<sub>4</sub></b>         |                   | 131.6                                                        |                                                  | 30.4                                                         |                                                  |                                                       | Ref. 13                                      |
|                                    | 20                |                                                              |                                                  |                                                              |                                                  | 31.3 ± 0.9 (20)                                       | Ref. 6                                       |
|                                    | 25                |                                                              |                                                  |                                                              |                                                  | 29.2 ± 0.2 (25)                                       | Ref. 8                                       |
| Ref. 1                             | 50                | 25.3                                                         | 0.8                                              | 24.7                                                         | 0.4                                              | 25.5 ± 0.2 (50)                                       | Ref. 8                                       |
| Ref. 1                             | 60                | 23.8                                                         | 0.6                                              | 21.5                                                         | 0.2                                              | 24.5 ± 0.3 (60)                                       | Ref. 8                                       |
| Ref. 1                             | 75                | 21.8                                                         | 0.2                                              | 20.1                                                         | 0.3                                              | 23.3 ± 0.2 (75)                                       | Ref. 8                                       |
| <b>BMIM PF<sub>6</sub></b>         |                   | 90.6                                                         |                                                  | 44.7                                                         |                                                  |                                                       | Ref. 13                                      |
|                                    | 25                |                                                              |                                                  |                                                              |                                                  | 33.2 ± 0.9 (25)                                       | Ref. 4                                       |
|                                    | 25                |                                                              |                                                  |                                                              |                                                  | 32.6 ± 0.2 (25)                                       | Ref. 9                                       |
| Ref. 2                             | 50                | 26.4                                                         | 0.4                                              | 24.6                                                         | 1.2                                              | 28.3 ± 0.2 (50)                                       | Ref. 9                                       |
| Ref. 2                             | 70                | 23.6                                                         | 0.2                                              | 24.3                                                         | 0.3                                              | 26.7 ± 0.2 (70)                                       | Ref. 9                                       |
| <b>HMIM PF<sub>6</sub></b>         |                   | 111.1                                                        |                                                  | 44.7                                                         |                                                  |                                                       | Ref. 13                                      |
|                                    | 25                |                                                              |                                                  |                                                              |                                                  | 35.4 ± 0.2 (25)                                       | Ref. 5                                       |
|                                    | 25                |                                                              |                                                  |                                                              |                                                  | 35.9 ± 0.7 (25)                                       | Ref. 4                                       |
|                                    | 50                |                                                              |                                                  |                                                              |                                                  | 29.2 ± 0.3 (50)                                       | Ref. 4                                       |
| Ref. 1                             | 50                | 25.0                                                         | 1.1                                              | 27.6                                                         | 0.4                                              | 31.0 ± 0.5 (50)                                       | Ref. 5                                       |
| Ref. 1                             | 60                | 25.4                                                         | 0.5                                              | 24.9                                                         | 1.0                                              | 29.1 ± 0.3 (60)                                       | Ref. 5                                       |
|                                    | 70                |                                                              |                                                  |                                                              |                                                  | 27.2 ± 0.3 (70)                                       | Ref. 4                                       |
| Ref. 1                             | 75                | 23.8                                                         | 0.4                                              | 24.6                                                         | 0.2                                              | 27.0 ± 0.4 (75)                                       | Ref. 5                                       |
| <b>OMIM PF<sub>6</sub></b>         |                   | 131.6                                                        |                                                  | 44.7                                                         |                                                  |                                                       | Ref. 13                                      |
|                                    | 20                |                                                              |                                                  |                                                              |                                                  | 37.0 ± 0.9 (20)                                       | Ref. 10                                      |
|                                    | 25                |                                                              |                                                  |                                                              |                                                  | 35.5 ± 0.3 (25)                                       | Ref. 8                                       |
|                                    | 35                |                                                              |                                                  |                                                              |                                                  | 34.0 ± 0.3 (35)                                       | Ref. 8                                       |
|                                    | 40                |                                                              |                                                  |                                                              |                                                  | 33.8 ± 0.8 (40)                                       | Ref. 10                                      |
|                                    | 60                |                                                              |                                                  |                                                              |                                                  | 32.8 ± 1.1 (60)                                       | Ref. 10                                      |
|                                    | 60                |                                                              |                                                  |                                                              |                                                  | 30.7 ± 0.3 (60)                                       | Ref. 8                                       |
| Ref. 1                             | 70                | 26.9                                                         | 0.8                                              | N/A                                                          | N/A                                              | 28.8 ± 0.4 (70)                                       | Ref. 8                                       |

|                               |    |              |     |              |     |                 |                |
|-------------------------------|----|--------------|-----|--------------|-----|-----------------|----------------|
| Ref. 1                        | 75 | 26.0         | 0.4 | 31.1         | 2.2 |                 |                |
| Ref. 1                        | 80 | 24.8         | 0.6 | 29.1         | 1.2 | 33.9 ± 0.7 (80) | Ref. 10        |
| <b>BMPyrr TFSA</b>            |    | <b>101.8</b> |     | <b>95.6</b>  |     |                 | <b>Ref. 13</b> |
|                               | 25 |              |     |              |     | 31.4 ± 0.2 (25) | Ref. 3         |
| Ref. 3                        | 30 | 30.5         | 0.3 | 27.4         | 0.5 |                 |                |
|                               | 40 |              |     |              |     | 28.8 ± 0.3 (40) | Ref. 11        |
| Ref. 3                        | 50 | 26.0         | 0.2 | 25.9         | 0.3 | 28.6 ± 0.2 (50) | Ref. 3         |
| Ref. 3                        | 65 | 24.6         | 0.2 | 23.8         | 0.2 |                 |                |
|                               | 70 |              |     |              |     | 26.3 ± 0.1 (70) | Ref. 11        |
| Ref. 3                        | 75 | 23.0         | 0.1 | 22.6         | 0.2 | 27.3 ± 0.2 (75) | Ref. 3         |
|                               | 90 |              |     |              |     | 25.0 ± 0.4 (90) | Ref. 11        |
| <b>(EOM)MPyrr TFSA</b>        |    | <b>95.3</b>  |     | <b>95.6</b>  |     |                 | <b>Ref. 13</b> |
|                               | 40 |              |     |              |     | 27.0 ± 0.3 (40) | Ref. 11        |
|                               | 70 |              |     |              |     | 24.2 ± 0.2 (70) | Ref. 11        |
|                               | 90 |              |     |              |     | 23.7 ± 0.3 (90) | Ref. 11        |
| <b>BMMIM TFSA</b>             |    | <b>-</b>     |     | <b>95.6</b>  |     |                 | <b>Ref. 13</b> |
|                               | 40 |              |     |              |     | 29.7 ± 0.3 (40) | Ref. 12        |
|                               | 70 |              |     |              |     | 26.3 ± 0.2 (70) | Ref. 12        |
|                               | 90 |              |     |              |     | 24.7 ± 0.5 (90) | Ref. 12        |
| <b>HMIM TFSA</b>              |    | <b>111.1</b> |     | <b>95.6</b>  |     |                 | <b>Ref. 13</b> |
|                               | 25 |              |     |              |     | 27.7 ± 0.2 (25) | Ref. 4         |
|                               | 50 |              |     |              |     | 25.7 ± 0.3 (50) | Ref. 4         |
|                               | 70 |              |     |              |     | 23.8 ± 0.2 (70) | Ref. 4         |
| <b>C<sub>10</sub>MIM TFSA</b> |    | <b>152.1</b> |     | <b>95.6</b>  |     |                 | <b>Ref. 13</b> |
|                               | 25 |              |     |              |     | 29.8 ± 0.4 (25) | Ref. 4         |
|                               | 50 |              |     |              |     | 27.0 ± 0.4 (50) | Ref. 4         |
|                               | 70 |              |     |              |     | 27.1 ± 0.3 (70) | Ref. 4         |
| <b>EMIM EtSO<sub>4</sub></b>  |    | <b>70.2</b>  |     | <b>58.1</b>  |     |                 | <b>Ref. 13</b> |
|                               | 40 |              |     |              |     | 19.4 ± 0.1 (40) | Ref. 11        |
| <b>BMMIM FAP</b>              |    | <b>-</b>     |     | <b>136.5</b> |     |                 |                |
|                               | 40 |              |     |              |     | 46.0 ± 0.2 (40) | Ref. 12        |
|                               | 70 |              |     |              |     | 39.4 ± 0.1 (70) | Ref. 12        |
| <b>(EOM)MPyrr FAP</b>         |    | <b>95.3</b>  |     | <b>136.5</b> |     |                 | <b>Ref. 13</b> |
|                               | 40 |              |     |              |     | 42.4 ± 0.2 (40) | Ref. 12        |
|                               | 70 |              |     |              |     | 37.4 ± 0.1 (70) | Ref. 12        |
|                               | 90 |              |     |              |     | 32.7 ± 0.8 (90) | Ref. 12        |

## Reference list for Spreadsheet of Activation Volumes

- (1) Harris, K. R.; Kanakubo, M.; Tsuchihashi, N.; Ibuki, K.; Ueno, M., Effect of pressure on the transport properties of ionic liquids: 1-alkyl-3-methylimidazolium salts. *J. Phys. Chem. B* **2008**, *112*, 9830-9840. <http://dx.doi.org/10.1021/jp8021375>
- (2) Kanakubo, M.; Harris, K. R.; Tsuchihashi, N.; Ibuki, K.; Ueno, M., Effect of pressure on transport properties of the ionic liquid 1-butyl-3-methylimidazolium hexafluorophosphate. *J. Phys. Chem. B* **2007**, *111*, 2062-2069. <http://dx.doi.org/10.1021/jp067328k>
- (3) Harris, K. R.; Woolf, L. A.; Kanakubo, M.; Ruther, T., Transport Properties of N-Butyl-N-methylpyrrolidinium Bis(trifluoromethylsulfonyl)amide. *J. Chem. Eng. Data* **2011**, *56*, 4672-4685. <http://dx.doi.org/10.1021/je2006049>
- (4) Ahosseini, A.; Scurto, A. M., Viscosity of imidazolium-based ionic liquids at elevated pressures: Cation and anion effects. *Int. J. Thermophys.* **2008**, *29*, 1222-1243. <http://dx.doi.org/10.1007/s10765-008-0497-7>
- (5) Harris, K. R.; Kanakubo, M.; Woolf, L. A., Temperature and pressure dependence of the viscosity of the ionic liquids 1-hexyl-3-methylimidazolium hexafluorophosphate and 1-butyl-3-methylimidazolium bis(trifluoromethylsulfonyl)imide. *J. Chem. Eng. Data* **2007**, *52*, 1080-1085. <http://dx.doi.org/10.1021/je700032n>
- (6) Sanmamed, Y. A.; Gonzalez-Salgado, D.; Troncoso, J.; Romani, L.; Baylaucq, A.; Boned, C., Experimental methodology for precise determination of density of RTILs as a function of temperature and pressure using vibrating tube densimeters. *J. Chem. Thermodyn.* **2010**, *42*, 553-563. <http://dx.doi.org/10.1016/j.jct.2009.11.014>
- (7) Harris, K. R.; Kanakubo, M.; Woolf, L. A., Temperature and pressure dependence of the viscosity of the ionic liquid 1-butyl-3-methylimidazolium tetrafluoroborate: Viscosity and density relationships in ionic liquids. *J. Chem. Eng. Data* **2007**, *52*, 2425-2430. <http://dx.doi.org/10.1021/je700370z>
- (8) Harris, K. R.; Kanakubo, M.; Woolf, L. A., Temperature and pressure dependence of the viscosity of the ionic liquids 1-methyl-3-octylimidazolium hexafluorophosphate and 1-methyl-3-octylimidazolium tetrafluoroborate. *J. Chem. Eng. Data* **2006**, *51*, 1161-1167. <http://dx.doi.org/10.1021/je060082s>
- (9) Harris, K. R.; Woolf, L. A.; Kanakubo, M., Temperature and pressure dependence of the viscosity of the ionic liquid 1-butyl-3-methylimidazolium hexafluorophosphate. *J. Chem. Eng. Data* **2005**, *50*, 1777-1782. <http://dx.doi.org/10.1021/je050147b>
- (10) Tomida, D.; Kumagai, A.; Kenmochi, S.; Qiao, K.; Yokoyama, C., Viscosity of 1-hexyl-3-methylimidazolium hexafluorophosphate and 1-octyl-3-methylimidazolium hexafluorophosphate at high pressure. *J. Chem. Eng. Data* **2007**, *52*, 577-579. <http://dx.doi.org/10.1021/je060464y>

- (11) Gacino, F. M.; Paredes, X.; Comunas, M. J. P.; Fernandez, J., Effect of the pressure on the viscosities of ionic liquids: Experimental values for 1-ethyl-3-methylimidazolium ethylsulfate and two bis(trifluoromethyl-sulfonyl)imide salts. *J. Chem. Thermodyn.* **2012**, *54*, 302-309. <http://dx.doi.org/10.1016/j.jct.2012.05.007>
- (12) Gacino, F. M.; Paredes, X.; Comunas, M. J. P.; Fernandez, J., Pressure dependence on the viscosities of 1-butyl-2,3-dimethylimidazolium bis(trifluoromethylsulfonyl)imide and two tris(pentafluoroethyl)trifluorophosphate based ionic liquids: New measurements and modelling. *J. Chem. Thermodyn.* **2013**, *62*, 162-169. <http://dx.doi.org/10.1016/j.jct.2013.02.014>
- (13) Kaintz, A.; Baker, G.; Benesi, A.; Maroncelli, M., Solute Diffusion in Ionic Liquids, NMR Measurements and Comparisons to Conventional Solvents. *J. Phys. Chem. B* **2013**, *117*, 11697-11708. <http://dx.doi.org/10.1021/jp405393d>

## Directory of fitted activation volume data

### Glossary of chemical nomenclature for fitted data

Due to the sheer number of entries and data sets, some designations in the supporting information are different than those used in the manuscript.

BMIM = 1-butyl-3-methylimidazolium cation  
BMMIM = 1-butyl-2-methyl-3-methylimidazolium cation  
BMpyrr = P<sub>14</sub> = 1-butyl-1-methylpyrrolidinium cation  
C10MIM = 1-decyl-3-methylimidazolium cation  
EMIM = 1-ethyl-3-methylimidazolium cation  
(EOM)Mpyrr = 1-butyl-1-methoxyethylpyrrolidinium cation  
HMIM = 1-hexyl-3-methylimidazolium cation  
OMIM = 1-methyl-3-octylimidazolium cation

BF<sub>4</sub> = tetrafluoroborate anion  
EtSO<sub>4</sub> = ethylsulfate anion  
FAP = tris(pentafluoroethyl)trifluorophosphate anion  
FSA = bis(fluorosulfonyl)amide anion  
PF<sub>6</sub> = hexafluorophosphate anion  
TFSA = NTf<sub>2</sub> = bis(trifluoromethylsulfonyl)amide anion

### Plots of ionic self-diffusion constants versus pressure (counter-ion in parentheses)

#### Cations

|                                                 |       |
|-------------------------------------------------|-------|
| bmim (BF <sub>4</sub> ) 25C self-diffusion plot | p. 9  |
| bmim (BF <sub>4</sub> ) 50C self-diffusion plot | p. 10 |
| bmim (BF <sub>4</sub> ) 75C self-diffusion plot | p. 11 |
| bmim (PF <sub>6</sub> ) 50C self-diffusion plot | p. 12 |
| bmim (PF <sub>6</sub> ) 70C self-diffusion plot | p. 13 |
| BMpyrr (TFSA) 30C self-diffusion plot           | p. 14 |
| BMpyrr (TFSA) 50C self-diffusion plot           | p. 15 |
| BMpyrr (TFSA) 65C self-diffusion plot           | p. 16 |
| BMpyrr (TFSA) 75C self-diffusion plot           | p. 17 |
| hmim (PF <sub>6</sub> ) 50C self-diffusion plot | p. 18 |
| hmim (PF <sub>6</sub> ) 60C self-diffusion plot | p. 19 |
| hmim (PF <sub>6</sub> ) 75C self-diffusion plot | p. 20 |
| omim (BF <sub>4</sub> ) 50C self-diffusion plot | p. 21 |
| omim (BF <sub>4</sub> ) 60C self-diffusion plot | p. 22 |
| omim (BF <sub>4</sub> ) 75C self-diffusion plot | p. 23 |
| omim (PF <sub>6</sub> ) 70C self-diffusion plot | p. 24 |
| omim (PF <sub>6</sub> ) 75C self-diffusion plot | p. 25 |
| omim (PF <sub>6</sub> ) 80C self-diffusion plot | p. 26 |

## Anions

|                                       |       |
|---------------------------------------|-------|
| BF4 (bmim) 50C self-diffusion plot    | p. 27 |
| BF4 (bmim) 75C self-diffusion plot    | p. 28 |
| BF4 (omim) 50C self-diffusion plot    | p. 29 |
| BF4 (omim) 60C self-diffusion plot    | p. 30 |
| BF4 (omim) 75C self-diffusion plot    | p. 31 |
| PF6 (bmim) 50C self-diffusion plot    | p. 32 |
| PF6 (bmim) 70C self-diffusion plot    | p. 33 |
| PF6 (hmim) 50C self-diffusion plot    | p. 34 |
| PF6 (hmim) 60C self-diffusion plot    | p. 35 |
| PF6 (hmim) 75C self-diffusion plot    | p. 36 |
| PF6 (omim) 75C self-diffusion plot    | p. 37 |
| PF6 (omim) 80C self-diffusion plot    | p. 38 |
| TFSA (BMpyrr) 30C self-diffusion plot | p. 39 |
| TFSA (BMpyrr) 50C self-diffusion plot | p. 40 |
| TFSA (BMpyrr) 65C self-diffusion plot | p. 41 |
| TFSA (BMpyrr) 75C self-diffusion plot | p. 42 |

## Plots of ln(fluidity) (inverse viscosity) versus pressure

|                                                 |       |
|-------------------------------------------------|-------|
| bmim BF4 20 C viscosity-pressure plot           | p. 43 |
| bmim BF4 25 C viscosity-pressure plot           | p. 44 |
| bmim BF4 50 C viscosity-pressure plot           | p. 45 |
| bmim BF4 75 C viscosity-pressure plot           | p. 46 |
| bmim PF6 25 C Ahosseini viscosity-pressure plot | p. 47 |
| bmim PF6 25 C Harris viscosity-pressure plot    | p. 48 |
| bmim PF6 50 C viscosity-pressure plot           | p. 49 |
| bmim PF6 70 C viscosity-pressure plot           | p. 50 |
| bmim TFSA 25 C viscosity-pressure plot          | p. 51 |
| bmim TFSA 50 C viscosity-pressure plot          | p. 52 |
| bmim TFSA 75 C viscosity-pressure plot          | p. 53 |
| bmmim FAP 40 C viscosity-pressure plot          | p. 54 |
| bmmim FAP 70 C viscosity-pressure plot          | p. 55 |
| bmmim TFSA 40 C viscosity-pressure plot         | p. 56 |
| bmmim TFSA 70 C viscosity-pressure plot         | p. 57 |
| bmmim TFSA 90 C viscosity-pressure plot         | p. 58 |
| BMpyrr TFSA 25 C viscosity-pressure plot        | p. 59 |
| BMpyrr TFSA 40 C viscosity-pressure plot        | p. 60 |
| BMpyrr TFSA 50 C viscosity-pressure plot        | p. 61 |
| BMpyrr TFSA 70 C viscosity-pressure plot        | p. 62 |
| BMpyrr TFSA 75 C viscosity-pressure plot        | p. 63 |
| BMpyrr TFSA 90 C viscosity-pressure plot        | p. 64 |
| C10mim TFSA 25 C viscosity-pressure plot        | p. 65 |
| C10mim TFSA 50 C viscosity-pressure plot        | p. 66 |
| C10mim TFSA 70 C viscosity-pressure plot        | p. 67 |

|                                                 |        |
|-------------------------------------------------|--------|
| emim BF4 20 C viscosity-pressure plot           | p. 68  |
| emim BF4 30 C viscosity-pressure plot           | p. 69  |
| emim EtSO4 40 C viscosity-pressure plot         | p. 70  |
| emim TFSA 25 C viscosity-pressure plot          | p. 71  |
| emim TFSA 50 C viscosity-pressure plot          | p. 72  |
| emim TFSA 70 C viscosity-pressure plot          | p. 73  |
| (EOM)Mpyrr FAP 40 C viscosity-pressure plot     | p. 74  |
| (EOM)Mpyrr FAP 70 C viscosity-pressure plot     | p. 75  |
| (EOM)Mpyrr FAP 90 C viscosity-pressure plot     | p. 76  |
| (EOM)Mpyrr TFSA 40 C viscosity-pressure plot    | p. 77  |
| (EOM)Mpyrr TFSA 70 C viscosity-pressure plot    | p. 78  |
| (EOM)Mpyrr TFSA 90 C viscosity-pressure plot    | p. 79  |
| hmim BF4 22 C viscosity-pressure plot           | p. 80  |
| hmim BF4 25 C viscosity-pressure plot           | p. 81  |
| hmim BF4 50 C viscosity-pressure plot           | p. 82  |
| hmim BF4 70 C viscosity-pressure plot           | p. 83  |
| hmim PF6 25 C Ahosseini viscosity-pressure plot | p. 84  |
| hmim PF6 25 C Harris viscosity-pressure plot    | p. 85  |
| hmim PF6 50 C Ahosseini viscosity-pressure plot | p. 86  |
| hmim PF6 50 C Harris viscosity-pressure plot    | p. 87  |
| hmim PF6 60 C viscosity-pressure plot           | p. 88  |
| hmim PF6 70 C viscosity-pressure plot           | p. 89  |
| hmim PF6 75 C viscosity-pressure plot           | p. 90  |
| hmim TFSA 25 C viscosity-pressure plot          | p. 91  |
| hmim TFSA 50 C viscosity-pressure plot          | p. 92  |
| hmim TFSA 70 C viscosity-pressure plot          | p. 93  |
| omim BF4 20 C viscosity-pressure plot           | p. 94  |
| omim BF4 25 C viscosity-pressure plot           | p. 95  |
| omim BF4 50 C viscosity-pressure plot           | p. 96  |
| omim BF4 60 C viscosity-pressure plot           | p. 97  |
| omim BF4 75 C viscosity-pressure plot           | p. 98  |
| omim PF6 20 C viscosity-pressure plot           | p. 99  |
| omim PF6 25 C viscosity-pressure plot           | p. 100 |
| omim PF6 35 C viscosity-pressure plot           | p. 101 |
| omim PF6 40 C viscosity-pressure plot           | p. 102 |
| omim PF6 60 C Harris viscosity-pressure plot    | p. 103 |
| omim PF6 60 C Tomida viscosity-pressure plot    | p. 104 |
| omim PF6 70 C viscosity-pressure plot           | p. 105 |
| omim PF6 80 C viscosity-pressure plot           | p. 106 |



$\ln(D_+)$  vs. Pressure Plot for BMIM diffusion in BMIM BF<sub>4</sub> at 25 °C  
 Data from Harris et al. 10.1021/jp8021375

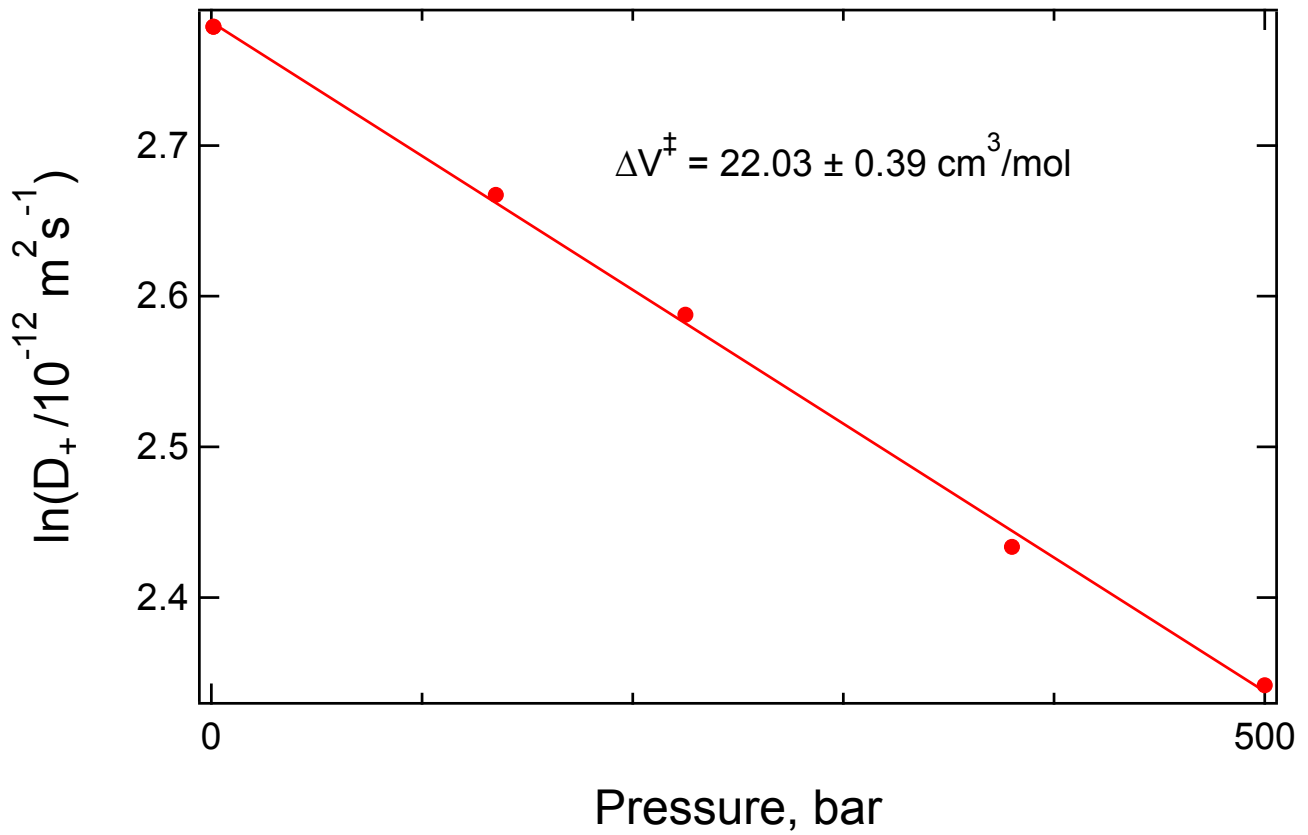

| Point | Pressure | D (10 <sup>-12</sup> m <sup>2</sup> /s) | ln(D) |
|-------|----------|-----------------------------------------|-------|
| 0     | 1        | 16.1                                    | 2.779 |
| 1     | 1        | 16.1                                    | 2.779 |
| 2     | 135      | 14.4                                    | 2.667 |
| 3     | 225      | 13.3                                    | 2.588 |
| 4     | 380      | 11.4                                    | 2.434 |
| 5     | 500      | 10.4                                    | 2.342 |

$\ln(D_+)$  vs. Pressure Plot for BMIM diffusion in BMIM BF<sub>4</sub> at 50 °C  
 Data from Harris et al. 10.1021/jp8021375

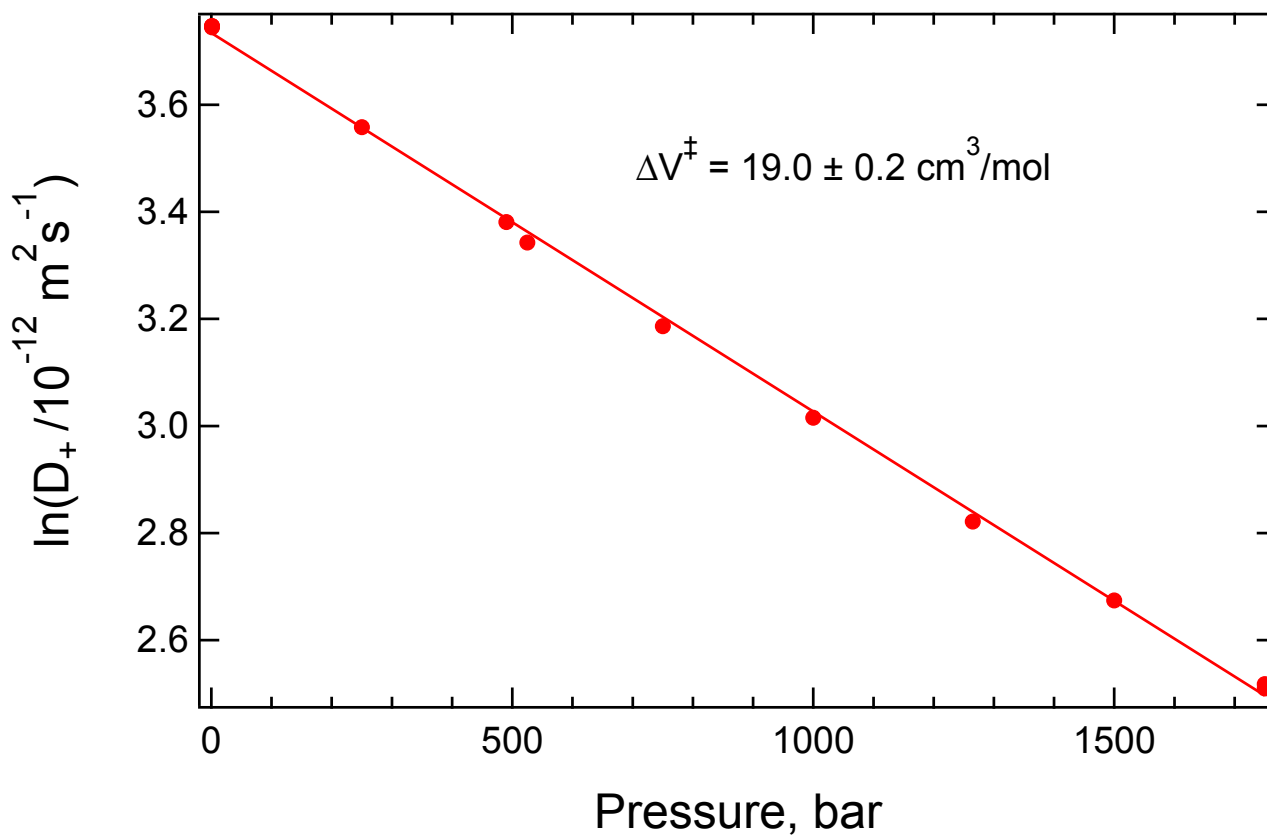

| Point | Pressure | D (10 <sup>-12</sup> m <sup>2</sup> /s) | ln(D) |
|-------|----------|-----------------------------------------|-------|
| 0     | 1        | 42.3                                    | 3.745 |
| 1     | 1        | 42.4                                    | 3.747 |
| 2     | 1        | 42.4                                    | 3.747 |
| 3     | 250      | 35.1                                    | 3.558 |
| 4     | 490      | 29.4                                    | 3.381 |
| 5     | 525      | 28.3                                    | 3.343 |
| 6     | 750      | 24.2                                    | 3.186 |
| 7     | 1000     | 20.4                                    | 3.016 |
| 8     | 1265     | 16.8                                    | 2.821 |
| 9     | 1500     | 14.5                                    | 2.674 |
| 10    | 1750     | 12.4                                    | 2.518 |
| 11    | 1750     | 12.3                                    | 2.510 |

$\ln(D_+)$  vs. Pressure Plot for BMIM diffusion in BMIM  $\text{BF}_4$  at 75 °C  
 Data from Harris et al. 10.1021/jp8021375

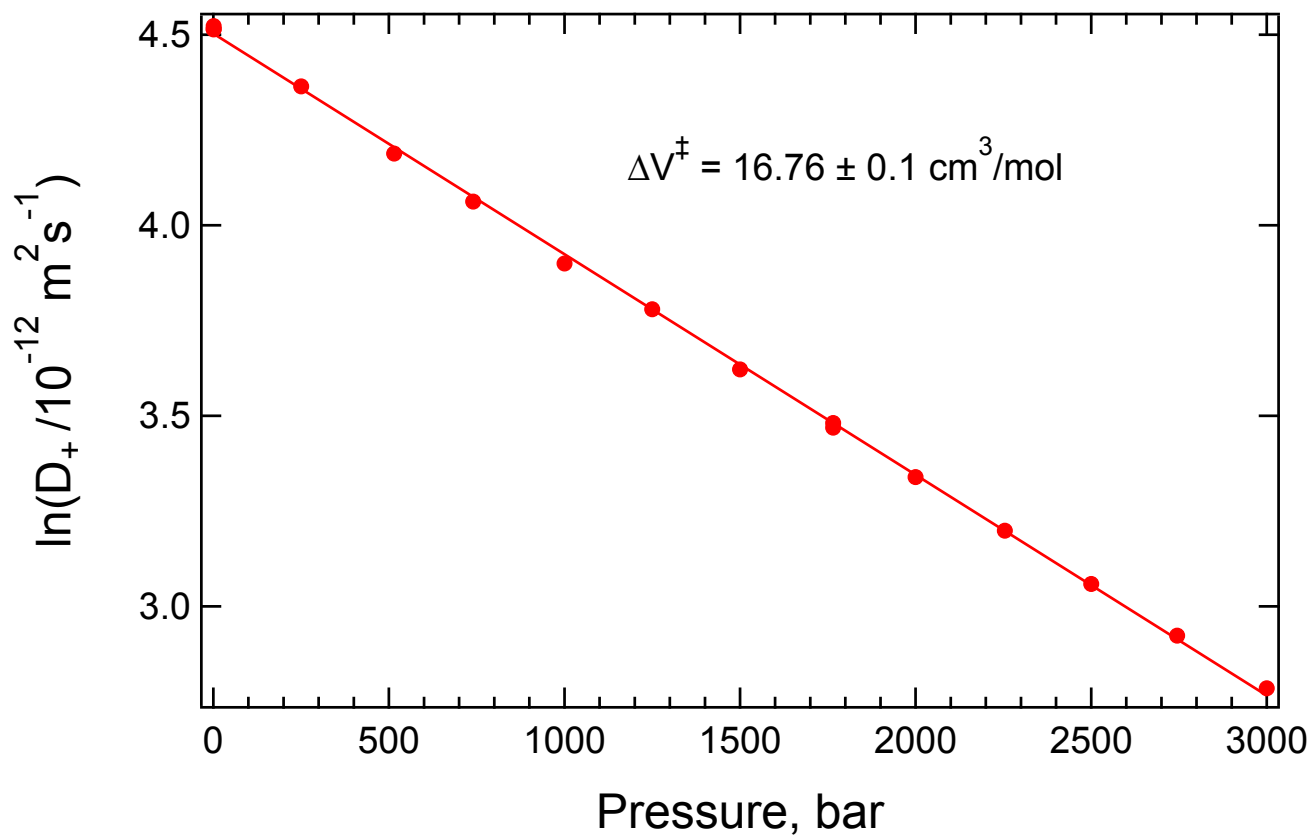

| Point | Pressure | D ( $10^{-12} \text{ m}^2/\text{s}$ ) | $\ln(D)$ |
|-------|----------|---------------------------------------|----------|
| 0     | 1        | 91.4                                  | 4.515    |
| 1     | 1        | 91.3                                  | 4.514    |
| 2     | 1        | 92.1                                  | 4.523    |
| 3     | 250      | 78.6                                  | 4.364    |
| 4     | 515      | 65.9                                  | 4.188    |
| 5     | 740      | 58.1                                  | 4.062    |
| 6     | 1000     | 49.4                                  | 3.900    |
| 7     | 1250     | 43.8                                  | 3.780    |
| 8     | 1500     | 37.4                                  | 3.622    |
| 9     | 1765     | 32.1                                  | 3.469    |
| 10    | 1765     | 32.5                                  | 3.481    |
| 11    | 2000     | 28.2                                  | 3.339    |
| 12    | 2254     | 24.5                                  | 3.199    |
| 13    | 2500     | 21.3                                  | 3.059    |
| 14    | 2745     | 18.6                                  | 2.923    |
| 15    | 3000     | 16.2                                  | 2.785    |

# ln(D<sub>+</sub>) vs. Pressure Plot for BMIM diffusion in BMIM PF<sub>6</sub> at 50 °C

Data from Kanakubo et al. 10.1021/jp063278k

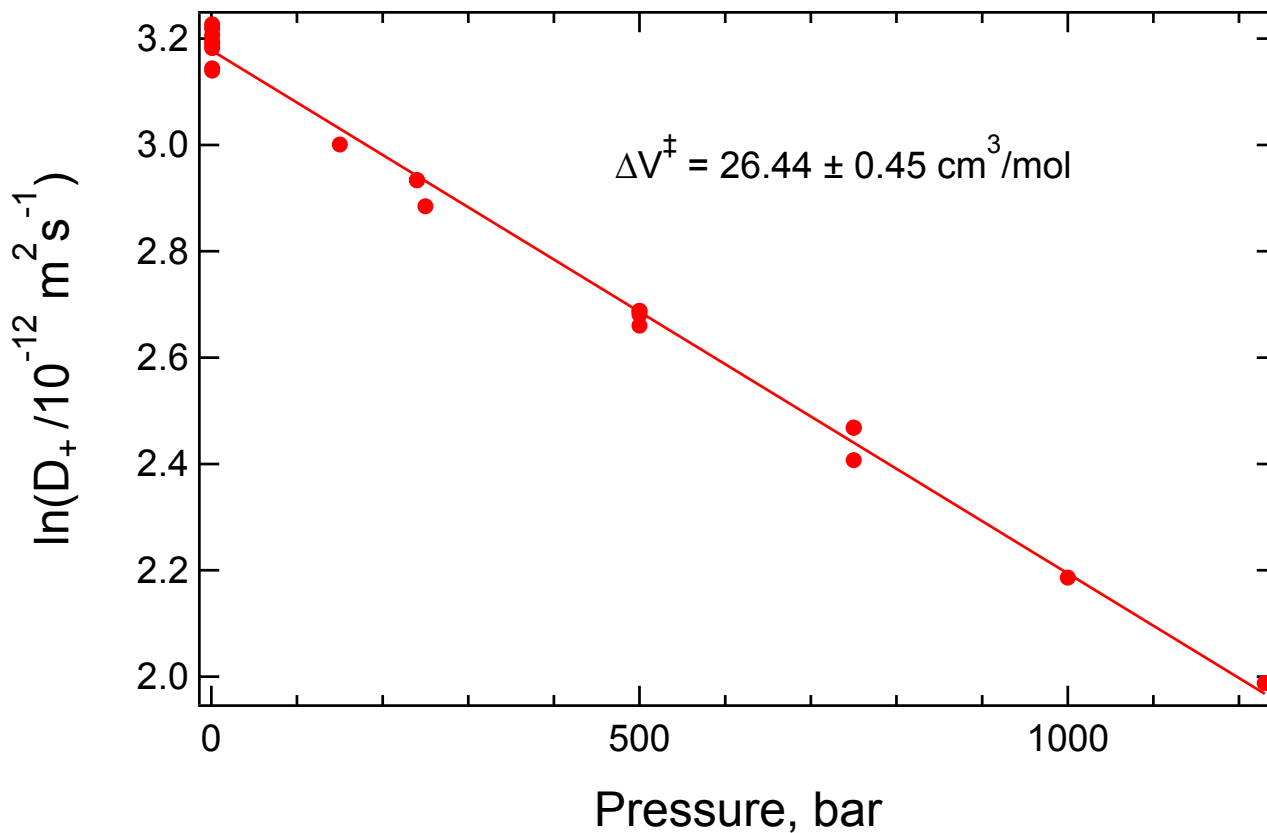

| Point | Pressure | D (10 <sup>-12</sup> m <sup>2</sup> /s) | ln(D) |  |
|-------|----------|-----------------------------------------|-------|--|
| 0     | 1        | 24.1                                    | 3.182 |  |
| 1     | 1        | 24.4                                    | 3.195 |  |
| 2     | 1        | 24.7                                    | 3.207 |  |
| 3     | 1        | 23.2                                    | 3.144 |  |
| 4     | 1        | 23.1                                    | 3.140 |  |
| 5     | 1        | 24.3                                    | 3.190 |  |
| 6     | 1        | 25.0                                    | 3.219 |  |
| 7     | 1        | 25.2                                    | 3.227 |  |
| 8     | 150      | 20.1                                    | 3.001 |  |
| 9     | 240      | 18.8                                    | 2.934 |  |
| 10    | 240      | 18.8                                    | 2.934 |  |
| 11    | 250      | 17.9                                    | 2.885 |  |
| 12    | 500      | 14.3                                    | 2.660 |  |
| 13    | 500      | 14.7                                    | 2.688 |  |
| 14    | 500      | 14.6                                    | 2.681 |  |
| 15    | 500      | 14.7                                    | 2.688 |  |
| 16    | 750      | 11.1                                    | 2.407 |  |
| 17    | 750      | 11.8                                    | 2.468 |  |
| 18    | 750      | 11.8                                    | 2.468 |  |
| 19    | 1000     | 8.9                                     | 2.186 |  |
| 20    | 1230     | 7.3                                     | 1.988 |  |

# ln(D<sub>+</sub>) vs. Pressure Plot for BMIM diffusion in BMIM PF<sub>6</sub> at 70 °C

Data from Kanakubo et al. 10.1021/jp063278k

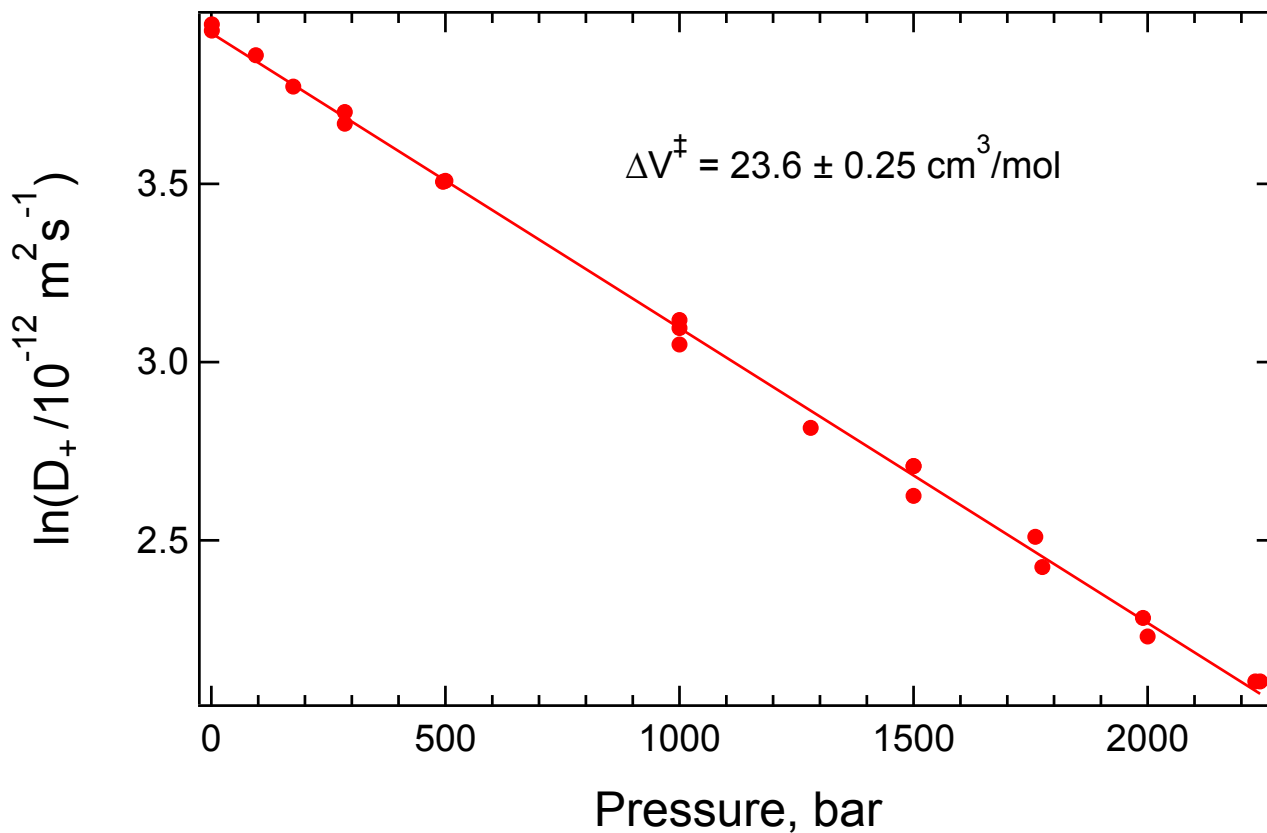

| Point | Pressure | D (10 <sup>-12</sup> m <sup>2</sup> /s) | ln(D) |
|-------|----------|-----------------------------------------|-------|
| 0     | 1280     | 16.7                                    | 2.815 |
| 1     | 2230     | 8.2                                     | 2.104 |
| 2     | 95       | 47.5                                    | 3.861 |
| 3     | 1000     | 21.1                                    | 3.049 |
| 4     | 1500     | 13.8                                    | 2.625 |
| 5     | 1775     | 11.3                                    | 2.425 |
| 6     | 1990     | 9.8                                     | 2.282 |
| 7     | 2000     | 9.3                                     | 2.230 |
| 8     | 175      | 43.5                                    | 3.773 |
| 9     | 1        | 50.9                                    | 3.930 |
| 10    | 285      | 39.2                                    | 3.669 |
| 11    | 285      | 40.5                                    | 3.701 |
| 12    | 1        | 51.8                                    | 3.947 |
| 13    | 495      | 33.3                                    | 3.506 |
| 14    | 500      | 33.4                                    | 3.509 |
| 15    | 1000     | 22.6                                    | 3.118 |
| 16    | 1000     | 22.1                                    | 3.096 |
| 17    | 1500     | 15.0                                    | 2.708 |
| 18    | 1500     | 15.0                                    | 2.708 |
| 19    | 1760     | 12.3                                    | 2.510 |
| 20    | 2240     | 8.2                                     | 2.104 |

# In(D<sub>+</sub>) vs. Pressure Plot for BMpyrr diffusion in BMpyrr TFSA at 30 °C

Data from Harris et al. 10.1021/je2006049

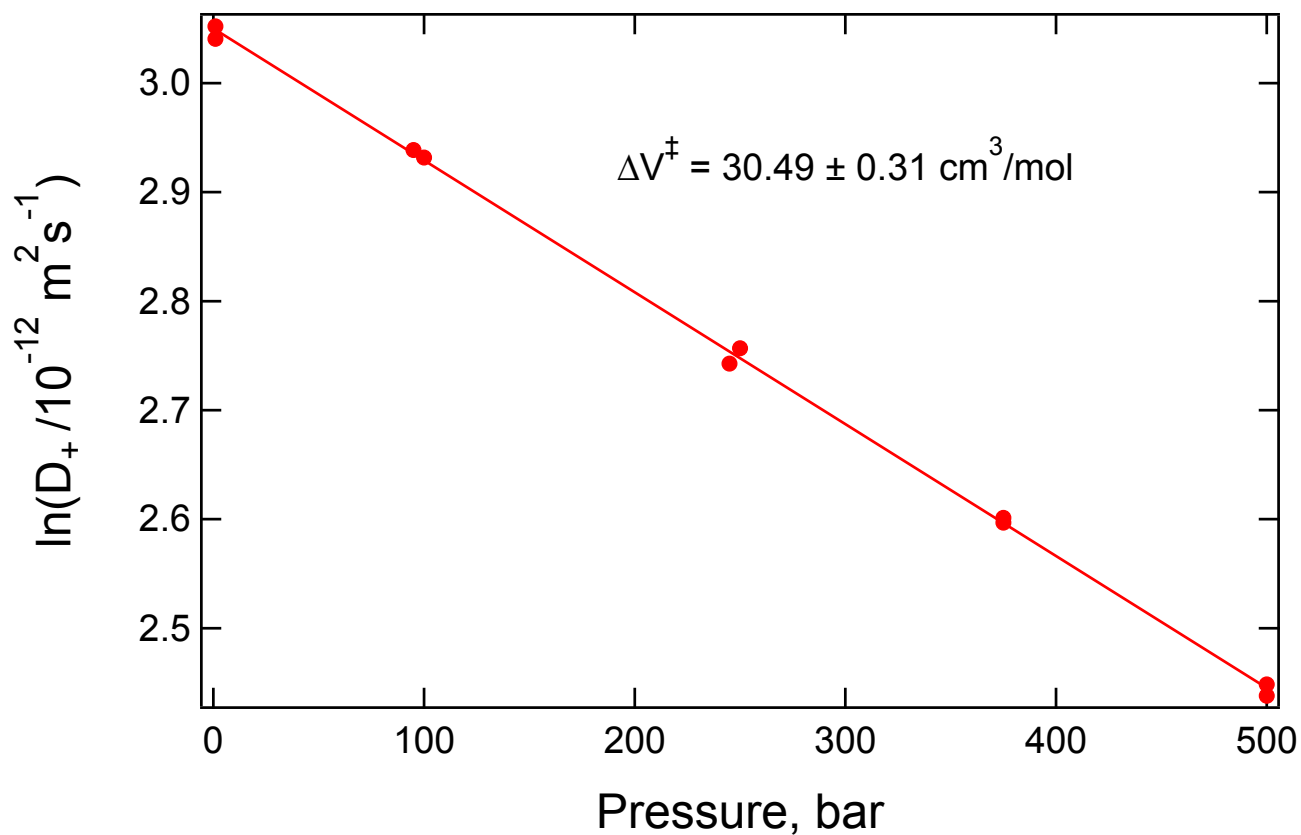

| Point | Pressure | D (10 <sup>-12</sup> m <sup>2</sup> /s) | ln(D) |
|-------|----------|-----------------------------------------|-------|
| 0     | 1        | 20.9                                    | 3.041 |
| 1     | 1        | 21.2                                    | 3.052 |
| 2     | 95       | 18.9                                    | 2.939 |
| 3     | 100      | 18.8                                    | 2.932 |
| 4     | 245      | 15.5                                    | 2.743 |
| 5     | 250      | 15.8                                    | 2.757 |
| 6     | 375      | 13.4                                    | 2.597 |
| 7     | 375      | 13.5                                    | 2.601 |
| 8     | 500      | 11.6                                    | 2.448 |
| 9     | 500      | 11.4                                    | 2.438 |

# ln(D<sub>+</sub>) vs. Pressure Plot for BMpyrr diffusion in BMpyrr TFSA at 50 °C

Data from Harris et al. 10.1021/je2006049

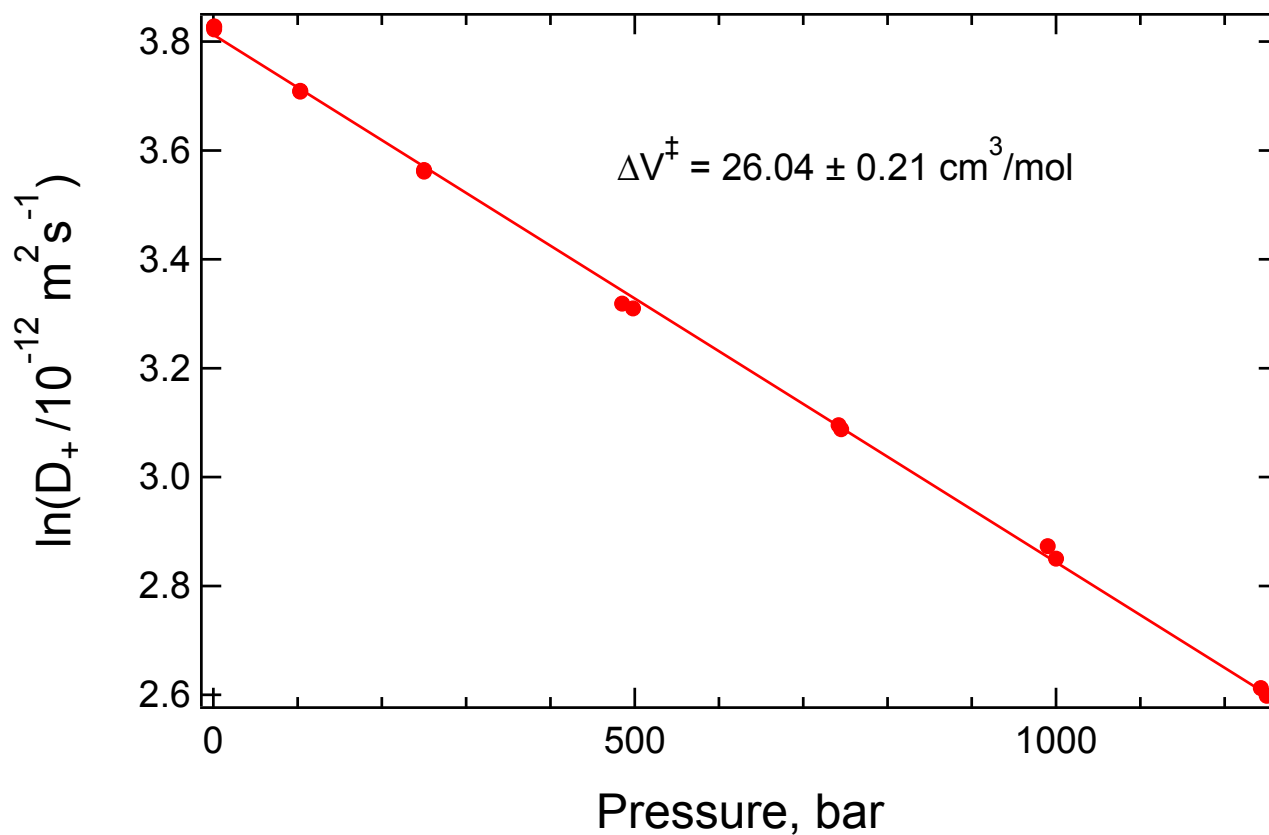

| Point | Pressure | D (10 <sup>-12</sup> m <sup>2</sup> /s) | ln(D) |
|-------|----------|-----------------------------------------|-------|
| 0     | 1.0      | 45.9                                    | 3.827 |
| 1     | 1.0      | 45.7                                    | 3.823 |
| 2     | 1.0      | 46.0                                    | 3.828 |
| 3     | 103.0    | 40.8                                    | 3.708 |
| 4     | 103.0    | 40.8                                    | 3.709 |
| 5     | 250.0    | 35.3                                    | 3.564 |
| 6     | 250.0    | 35.2                                    | 3.561 |
| 7     | 485.0    | 27.6                                    | 3.319 |
| 8     | 498.0    | 27.4                                    | 3.310 |
| 9     | 742.0    | 22.1                                    | 3.095 |
| 10    | 745.0    | 21.9                                    | 3.088 |
| 11    | 990.0    | 17.7                                    | 2.873 |
| 12    | 1000.0   | 17.3                                    | 2.850 |
| 13    | 1243.0   | 13.6                                    | 2.612 |
| 14    | 1250.0   | 13.4                                    | 2.598 |

# In(D<sub>+</sub>) vs. Pressure Plot for BMpyrr diffusion in BMpyrr TFSA at 65 °C

Data from Harris et al. 10.1021/je2006049

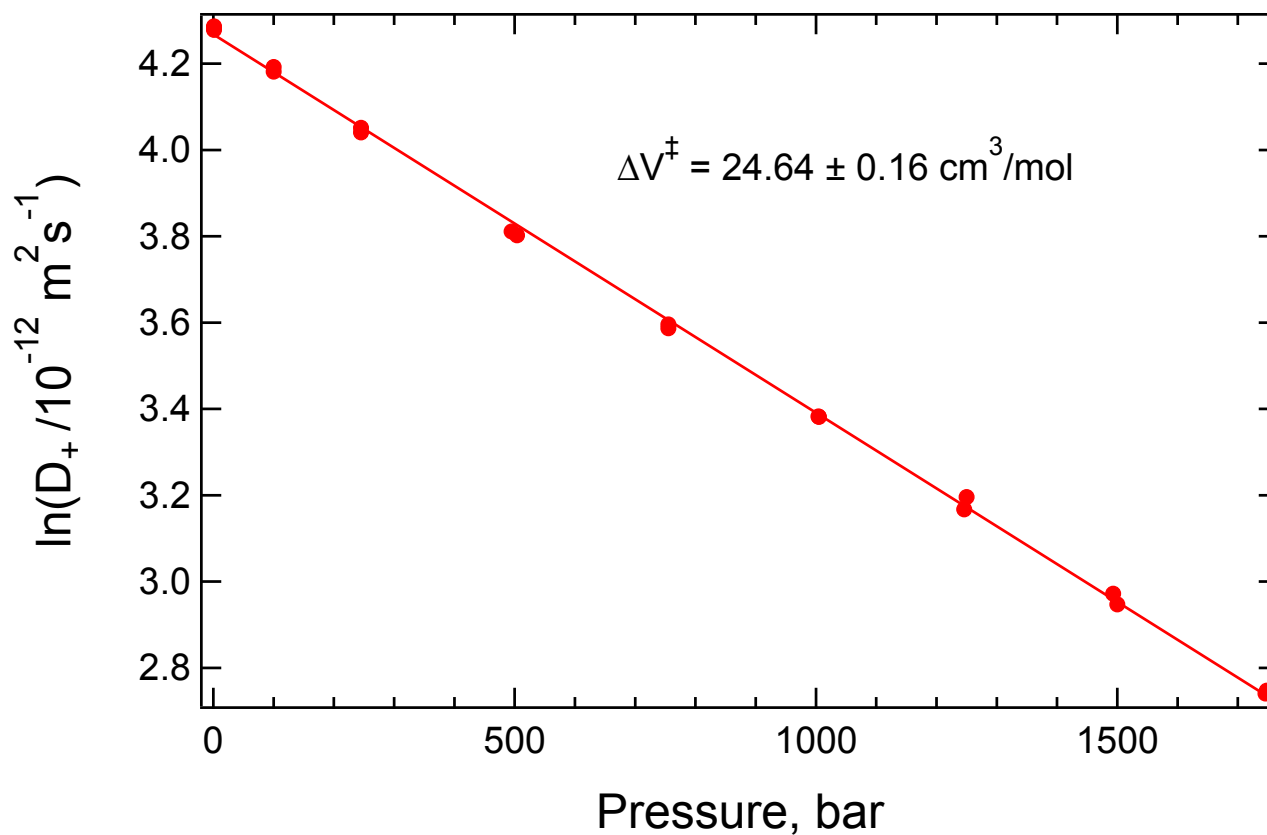

| Point | Pressure | D (10 <sup>-12</sup> m <sup>2</sup> /s) | ln(D) |
|-------|----------|-----------------------------------------|-------|
| 0     | 1.0      | 72.7                                    | 4.286 |
| 1     | 1.0      | 72.4                                    | 4.283 |
| 2     | 1.0      | 72.1                                    | 4.278 |
| 3     | 100.0    | 66.2                                    | 4.192 |
| 4     | 100.0    | 65.5                                    | 4.181 |
| 5     | 245.0    | 56.9                                    | 4.041 |
| 6     | 245.0    | 57.5                                    | 4.051 |
| 7     | 495.0    | 45.2                                    | 3.811 |
| 8     | 504.0    | 44.8                                    | 3.802 |
| 9     | 755.0    | 36.4                                    | 3.596 |
| 10    | 755.0    | 36.1                                    | 3.587 |
| 11    | 1004.0   | 29.5                                    | 3.383 |
| 12    | 1005.0   | 29.4                                    | 3.382 |
| 13    | 1246.0   | 23.7                                    | 3.167 |
| 14    | 1250.0   | 24.4                                    | 3.196 |
| 15    | 1493.0   | 19.5                                    | 2.972 |
| 16    | 1500.0   | 19.0                                    | 2.947 |
| 17    | 1746.0   | 15.5                                    | 2.741 |
| 18    | 1748.0   | 15.6                                    | 2.747 |



# ln(D<sub>+</sub>) vs. Pressure Plot for BMpyrr diffusion in BMpyrr TFSA at 75 °C

Data from Harris et al. 10.1021/je2006049

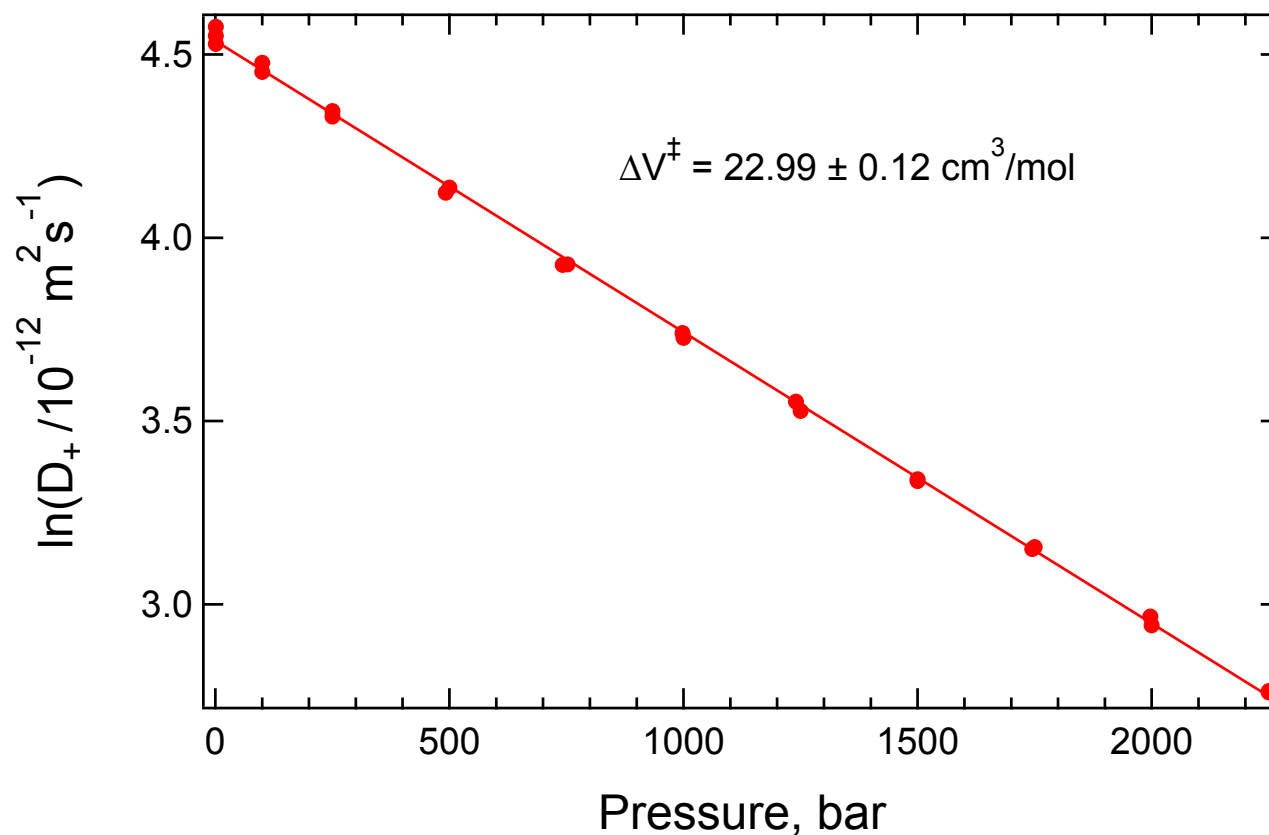

| Point | Pressure | D (10 <sup>-12</sup> m <sup>2</sup> /s) | ln(D) |
|-------|----------|-----------------------------------------|-------|
| 0     | 1.0      | 92.6                                    | 4.529 |
| 1     | 1.0      | 94.7                                    | 4.551 |
| 2     | 1.0      | 97.1                                    | 4.575 |
| 3     | 100.0    | 85.8                                    | 4.452 |
| 4     | 100.0    | 88.0                                    | 4.477 |
| 5     | 250.0    | 76.0                                    | 4.330 |
| 6     | 250.0    | 77.1                                    | 4.345 |
| 7     | 492.0    | 61.7                                    | 4.123 |
| 8     | 500.0    | 62.6                                    | 4.137 |
| 9     | 742.0    | 50.7                                    | 3.926 |
| 10    | 752.0    | 50.8                                    | 3.928 |
| 11    | 998.0    | 42.1                                    | 3.740 |
| 12    | 1000.0   | 41.6                                    | 3.727 |
| 13    | 1240.0   | 34.9                                    | 3.553 |
| 14    | 1250.0   | 34.0                                    | 3.528 |
| 15    | 1500.0   | 28.1                                    | 3.336 |
| 16    | 1500.0   | 28.3                                    | 3.341 |
| 17    | 1745.0   | 23.4                                    | 3.151 |
| 18    | 1750.0   | 23.5                                    | 3.156 |
| 19    | 1997.0   | 19.4                                    | 2.967 |
| 20    | 2000.0   | 19.0                                    | 2.943 |
| 21    | 2250.0   | 15.8                                    | 2.760 |
| 22    | 2250.0   | 15.9                                    | 2.764 |

# ln(D<sub>+</sub>) vs. Pressure Plot for HMIM diffusion in HMIM PF<sub>6</sub> at 50 °C

Data from Harris et al. 10.1021/jp8021375

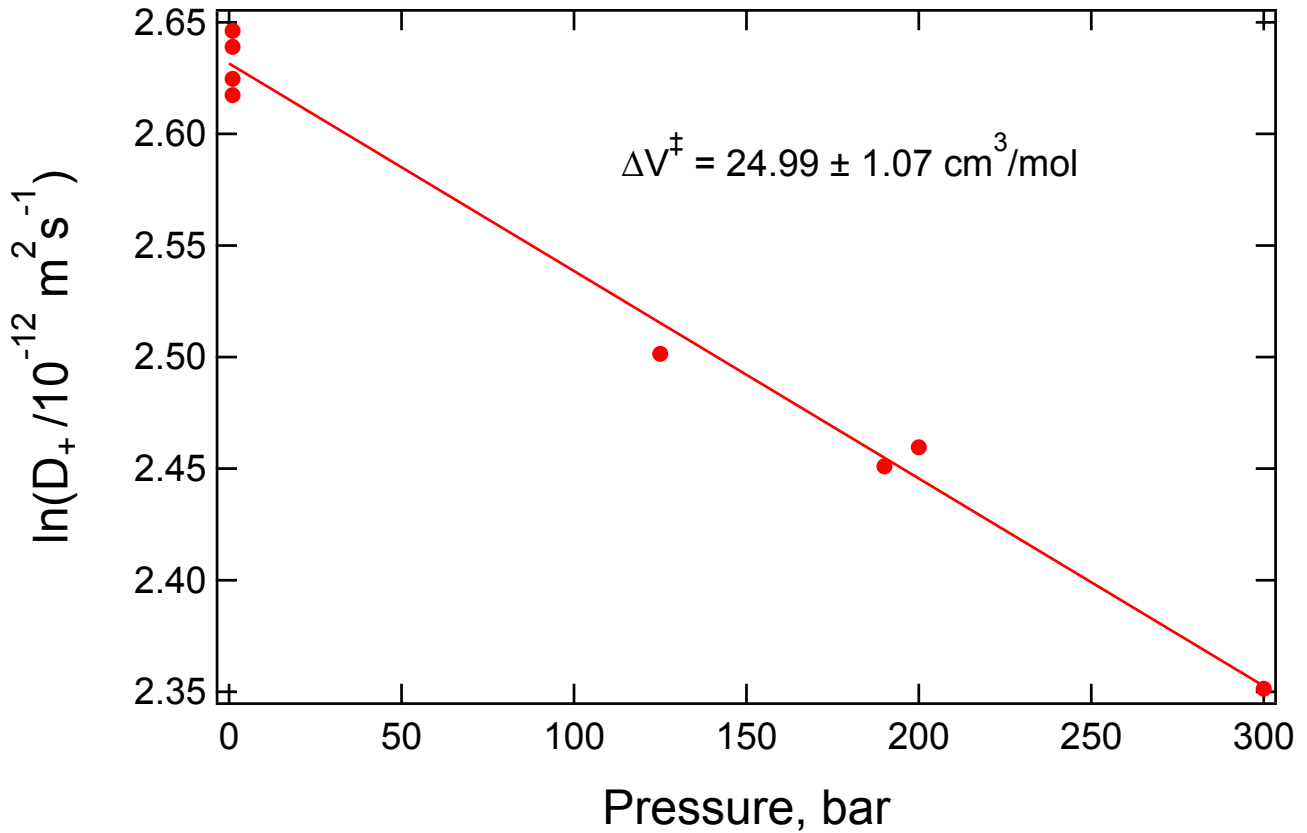

| Point | Pressure | D (10 <sup>-12</sup> m <sup>2</sup> /s) | ln(D) |
|-------|----------|-----------------------------------------|-------|
| 0     | 1        | 13.8                                    | 2.625 |
| 1     | 1        | 13.7                                    | 2.617 |
| 2     | 1        | 14.1                                    | 2.646 |
| 3     | 1        | 14.0                                    | 2.639 |
| 4     | 125      | 12.2                                    | 2.501 |
| 5     | 190      | 11.6                                    | 2.451 |
| 6     | 200      | 11.7                                    | 2.460 |
| 7     | 300      | 10.5                                    | 2.351 |

# ln(D<sub>+</sub>) vs. Pressure Plot for HMIM diffusion HMIM PF<sub>6</sub> at 60 °C

Data from Harris et al. 10.1021/jp8021375

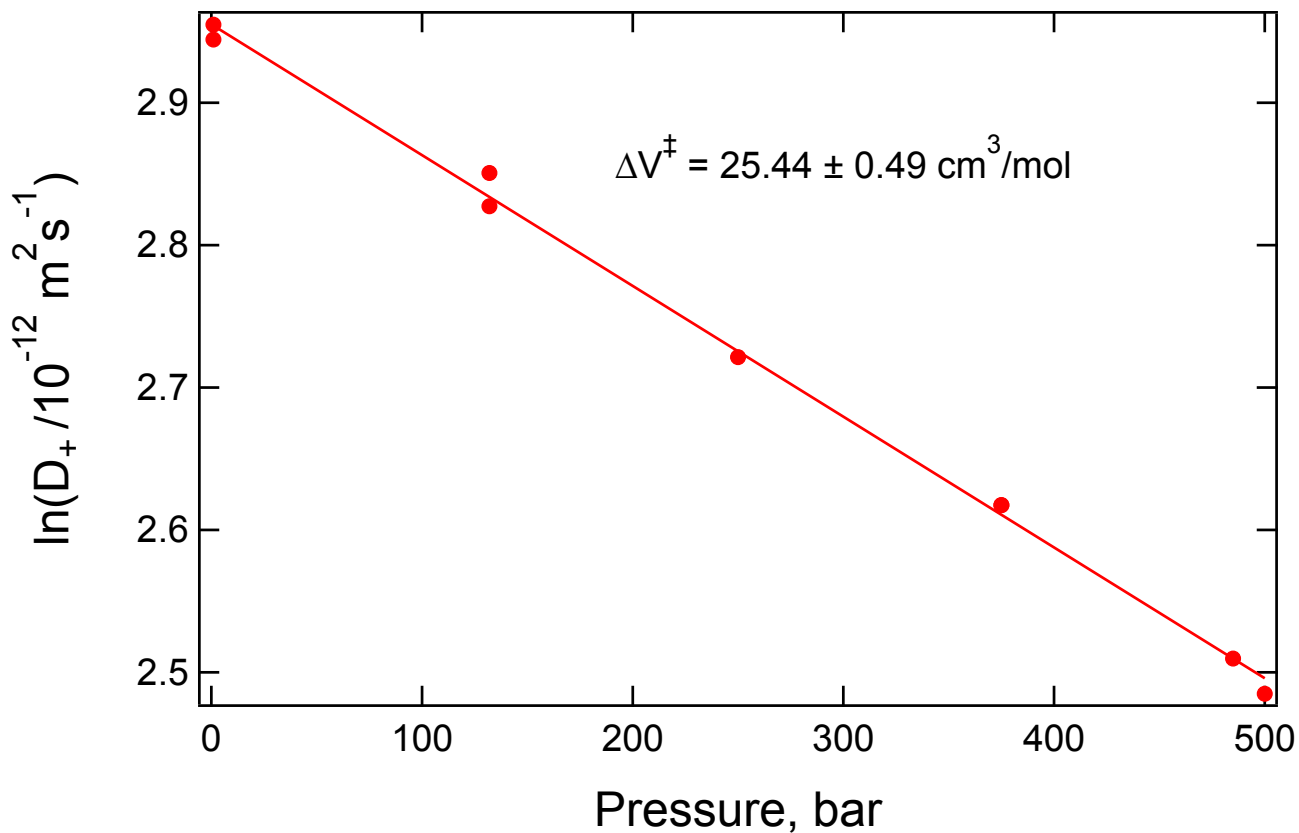

| Point | Pressure | D (10 <sup>-12</sup> m <sup>2</sup> /s) | ln(D) |
|-------|----------|-----------------------------------------|-------|
| 0     | 1        | 19.0                                    | 2.944 |
| 1     | 1        | 19.2                                    | 2.955 |
| 2     | 132      | 17.3                                    | 2.851 |
| 3     | 132      | 16.9                                    | 2.827 |
| 4     | 250      | 15.2                                    | 2.721 |
| 5     | 375      | 13.7                                    | 2.617 |
| 6     | 375      | 13.7                                    | 2.617 |
| 7     | 485      | 12.3                                    | 2.510 |
| 8     | 500      | 12.0                                    | 2.485 |

# ln(D<sub>+</sub>) vs. Pressure Plot for HMIM diffusion in HMIM PF<sub>6</sub> at 75 °C

Data from Harris et al. 10.1021/jp8021375

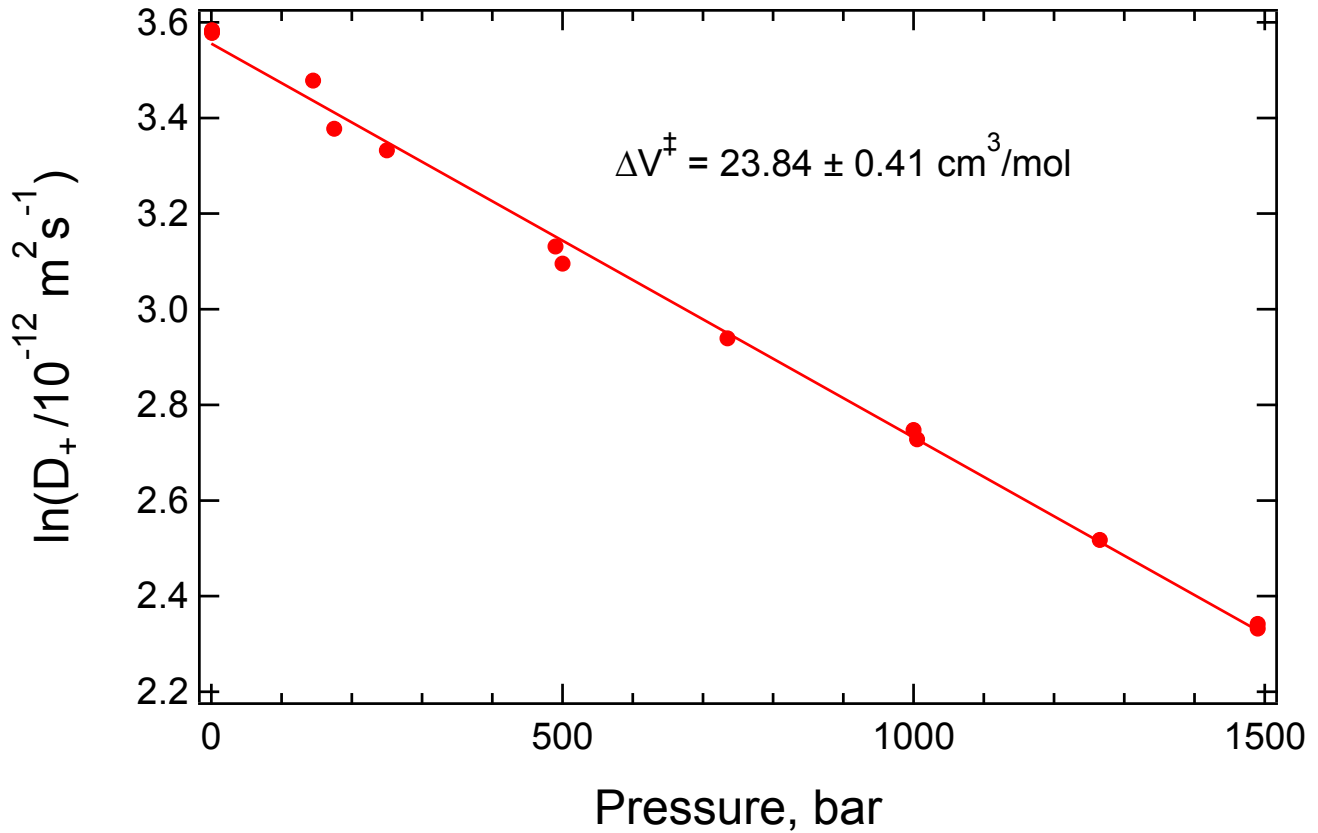

| Point | Pressure | D (10 <sup>-12</sup> m <sup>2</sup> /s) | ln(D) |
|-------|----------|-----------------------------------------|-------|
| 0     | 1        | 35.8                                    | 3.578 |
| 1     | 1        | 36.0                                    | 3.584 |
| 2     | 145      | 32.4                                    | 3.478 |
| 3     | 175      | 29.3                                    | 3.378 |
| 4     | 250      | 28.0                                    | 3.332 |
| 5     | 490      | 22.9                                    | 3.131 |
| 6     | 500      | 22.1                                    | 3.096 |
| 7     | 735      | 18.9                                    | 2.939 |
| 8     | 1000     | 15.6                                    | 2.747 |
| 9     | 1005     | 15.3                                    | 2.728 |
| 10    | 1265     | 12.4                                    | 2.518 |
| 11    | 1490     | 10.4                                    | 2.342 |
| 12    | 1490     | 10.3                                    | 2.332 |

# $\ln(D_+)$ vs. Pressure Plot for OMIM diffusion in OMIM $\text{BF}_4$ at 50 °C

Data from Harris et al. 10.1021/jp8021375

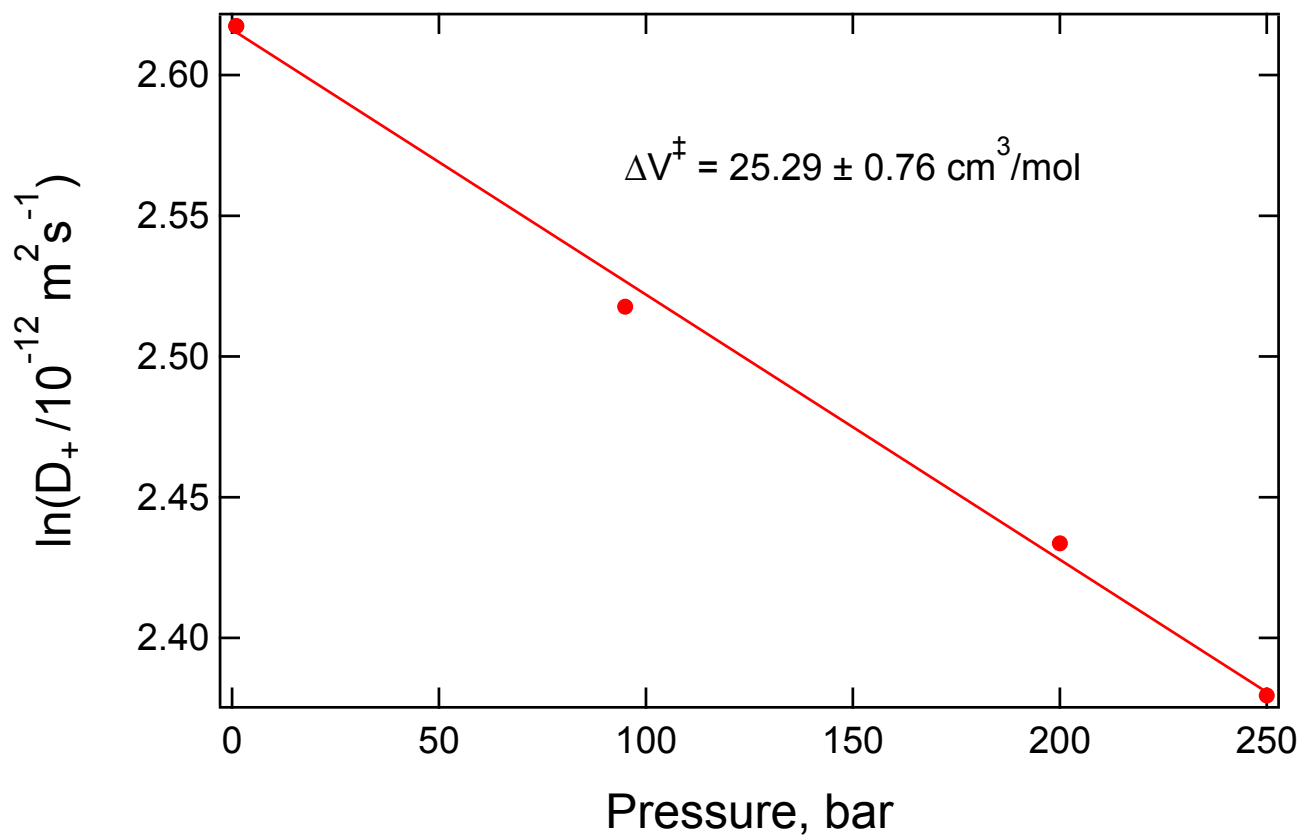

| Point | Pressure | D ( $10^{-12} \text{ m}^2/\text{s}$ ) | $\ln(D)$ |
|-------|----------|---------------------------------------|----------|
| 0     | 1        | 13.7                                  | 2.617    |
| 1     | 1        | 13.7                                  | 2.617    |
| 2     | 95       | 12.4                                  | 2.518    |
| 3     | 200      | 11.4                                  | 2.434    |
| 4     | 250      | 10.8                                  | 2.380    |

$\ln(D_+)$  vs. Pressure Plot for OMIM diffusion in OMIM  $\text{BF}_4$  at 60 °C  
 Data from Harris et al. 10.1021/jp8021375

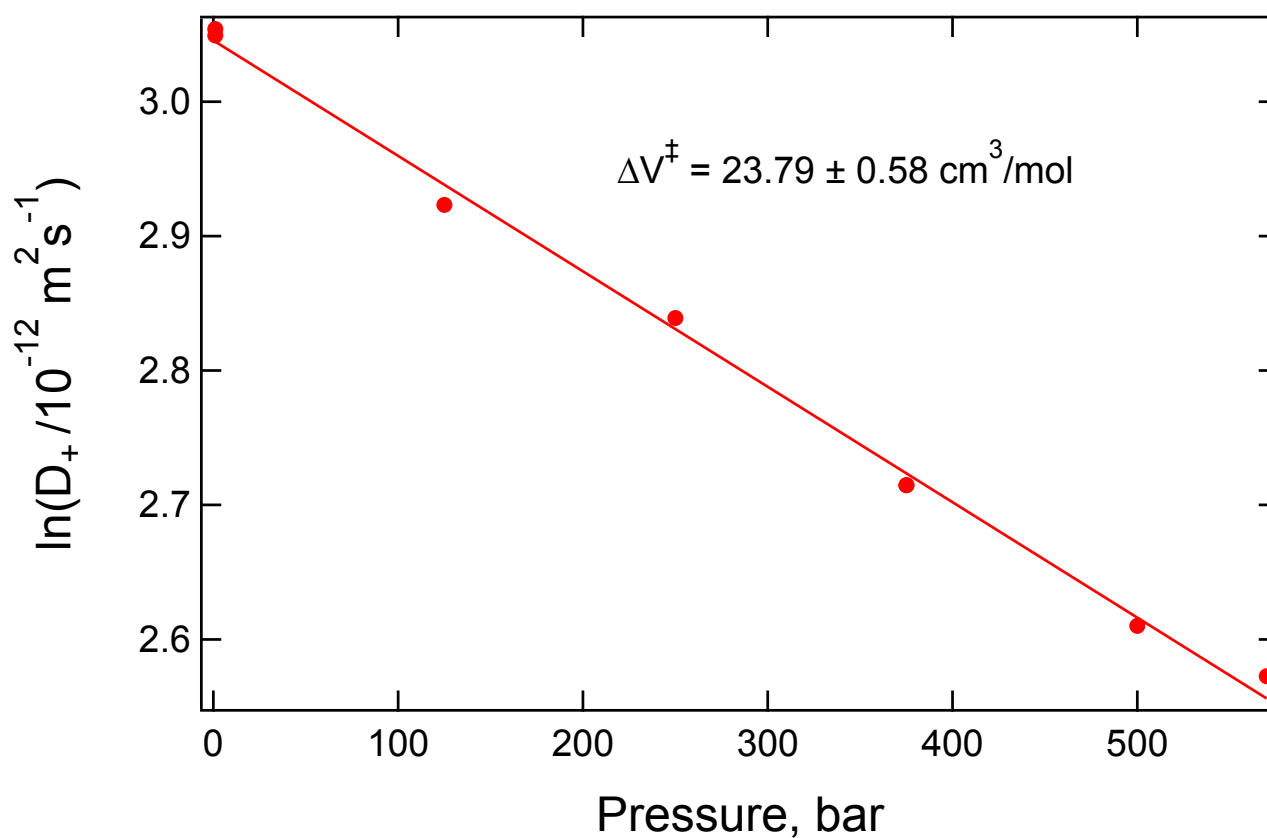

| Point | Pressure | D ( $10^{-12} \text{ m}^2/\text{s}$ ) | $\ln(D)$ |
|-------|----------|---------------------------------------|----------|
| 0     | 1        | 21.1                                  | 3.049    |
| 1     | 1        | 21.2                                  | 3.054    |
| 2     | 125      | 18.6                                  | 2.923    |
| 3     | 250      | 17.1                                  | 2.839    |
| 4     | 375      | 15.1                                  | 2.715    |
| 5     | 375      | 15.1                                  | 2.715    |
| 6     | 500      | 13.6                                  | 2.610    |
| 7     | 570      | 13.1                                  | 2.573    |

# ln(D<sub>+</sub>) vs. Pressure Plot for OMIM diffusion in OMIM BF<sub>4</sub> at 75 °C

Data from Harris et al. 10.1021/jp8021375

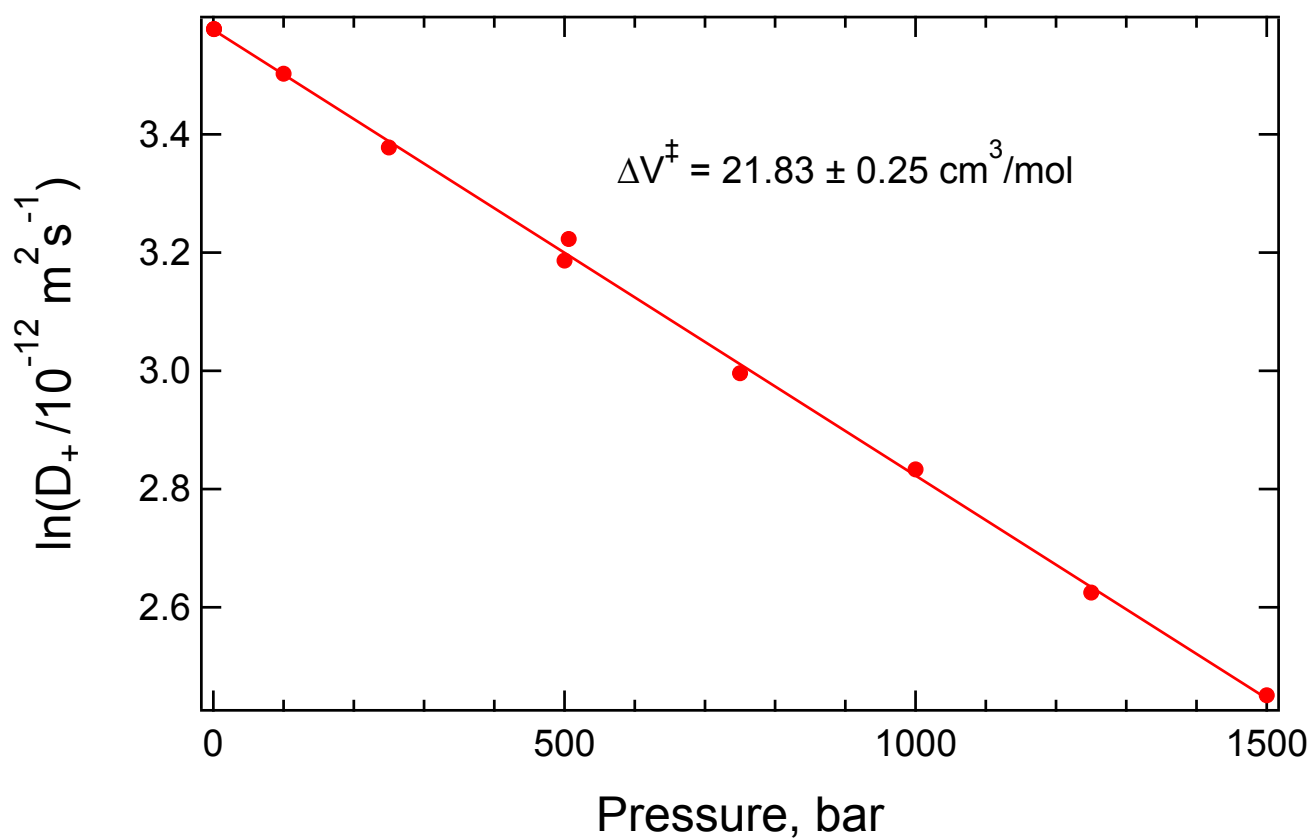

| Point | Pressure | D (10 <sup>-12</sup> m <sup>2</sup> /s) | ln(D) |
|-------|----------|-----------------------------------------|-------|
| 0     | 1        | 35.8                                    | 3.578 |
| 1     | 1        | 35.8                                    | 3.578 |
| 2     | 100      | 33.2                                    | 3.503 |
| 3     | 250      | 29.3                                    | 3.378 |
| 4     | 500      | 24.2                                    | 3.186 |
| 5     | 506      | 25.1                                    | 3.223 |
| 6     | 750      | 20.0                                    | 2.996 |
| 7     | 1000     | 17.0                                    | 2.833 |
| 8     | 1250     | 13.8                                    | 2.625 |
| 9     | 1500     | 11.6                                    | 2.451 |

In( $D_+$ ) vs. Pressure Plot for OMIM diffusion OMIM PF<sub>6</sub> at 70 °C  
 Data from Harris et al. 10.1021/jp8021375

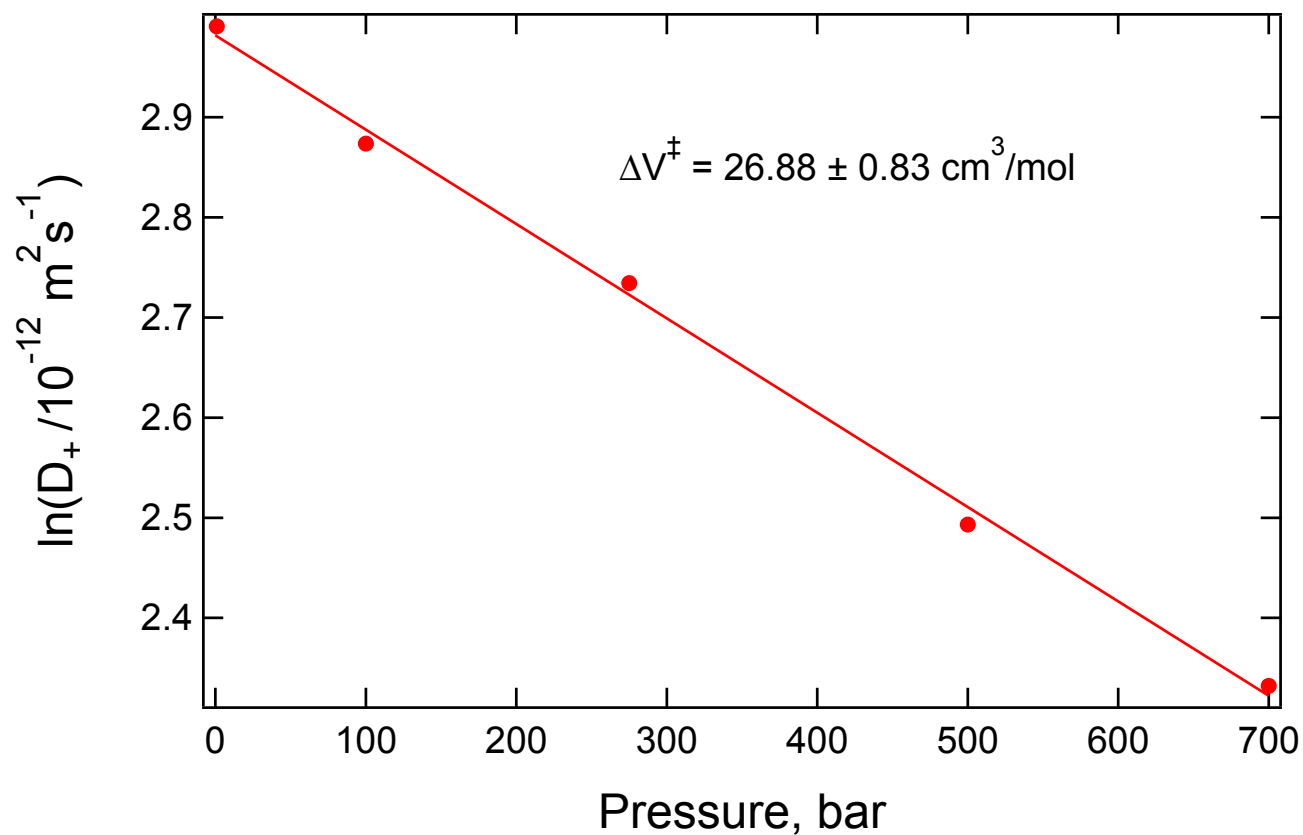

| Point | Pressure | D (10 <sup>-12</sup> m <sup>2</sup> /s) | ln(D) |
|-------|----------|-----------------------------------------|-------|
| 0     | 1        | 19.9                                    | 2.991 |
| 1     | 100      | 17.7                                    | 2.874 |
| 2     | 275      | 15.4                                    | 2.734 |
| 3     | 500      | 12.1                                    | 2.493 |
| 4     | 700      | 10.3                                    | 2.332 |



In( $D_+$ ) vs. Pressure Plot for OMIM diffusion OMIM PF<sub>6</sub> at 75 °C  
 Data from Harris et al. 10.1021/jp8021375

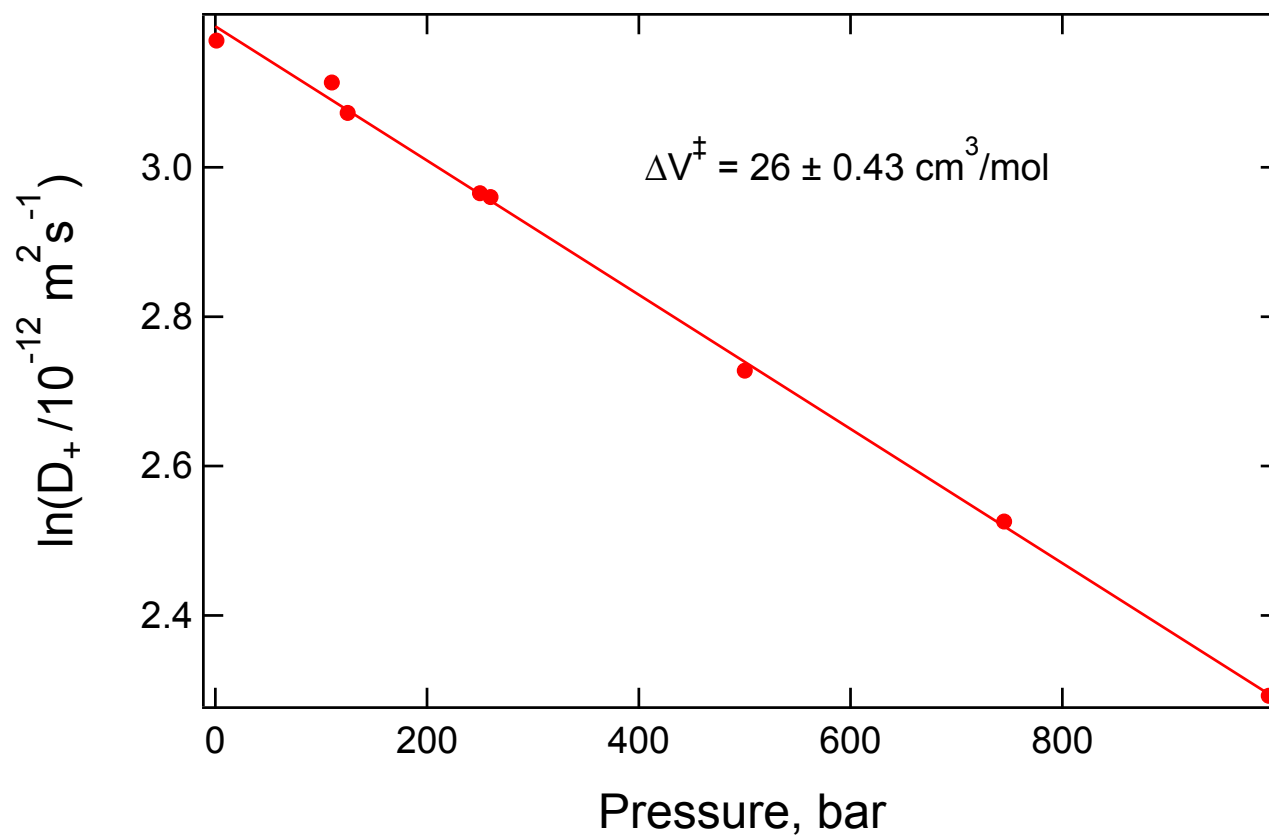

| Point | Pressure | D (10 <sup>-12</sup> m <sup>2</sup> /s) | ln(D) |
|-------|----------|-----------------------------------------|-------|
| 0     | 1        | 23.8                                    | 3.170 |
| 1     | 110      | 22.5                                    | 3.114 |
| 2     | 125      | 21.6                                    | 3.073 |
| 3     | 250      | 19.4                                    | 2.965 |
| 4     | 260      | 19.3                                    | 2.960 |
| 5     | 500      | 15.3                                    | 2.728 |
| 6     | 745      | 12.5                                    | 2.526 |
| 7     | 995      | 9.9                                     | 2.293 |

In( $D_+$ ) vs. Pressure Plot for OMIM diffusion OMIM PF<sub>6</sub> at 80 °C  
 Data from Harris et al. 10.1021/jp8021375

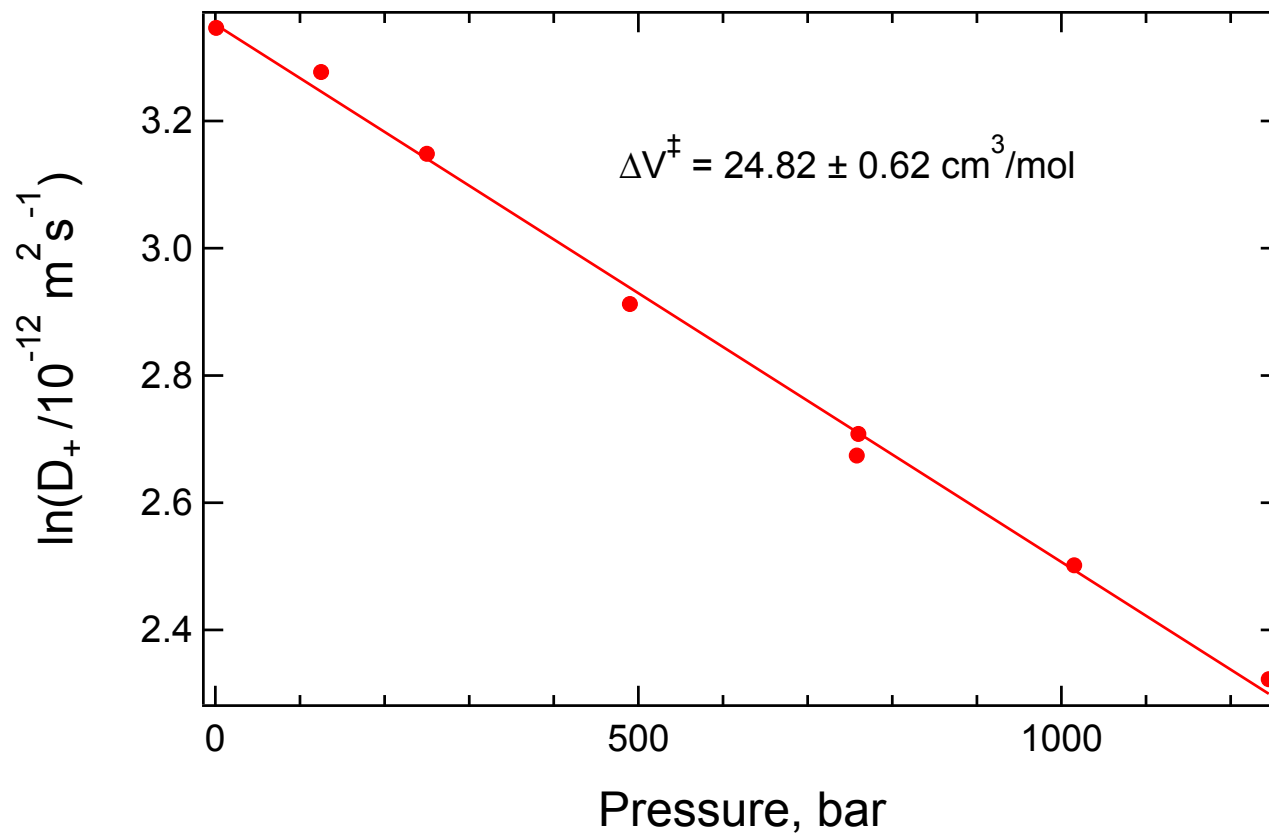

| Point | Pressure | D ( $10^{-12} \text{ m}^2/\text{s}$ ) | ln(D) |
|-------|----------|---------------------------------------|-------|
| 0     | 1        | 28.4                                  | 3.346 |
| 1     | 125      | 26.5                                  | 3.277 |
| 2     | 250      | 23.3                                  | 3.148 |
| 3     | 490      | 18.4                                  | 2.912 |
| 4     | 758      | 14.5                                  | 2.674 |
| 5     | 760      | 15.0                                  | 2.708 |
| 6     | 1015     | 12.2                                  | 2.501 |
| 7     | 1245     | 10.2                                  | 2.322 |

In(D<sub>-</sub>) vs. Pressure Plot for BF<sub>4</sub> diffusion in BMIM BF<sub>4</sub> at 50 °C  
 Data from Harris et al. 10.1021/jp8021375

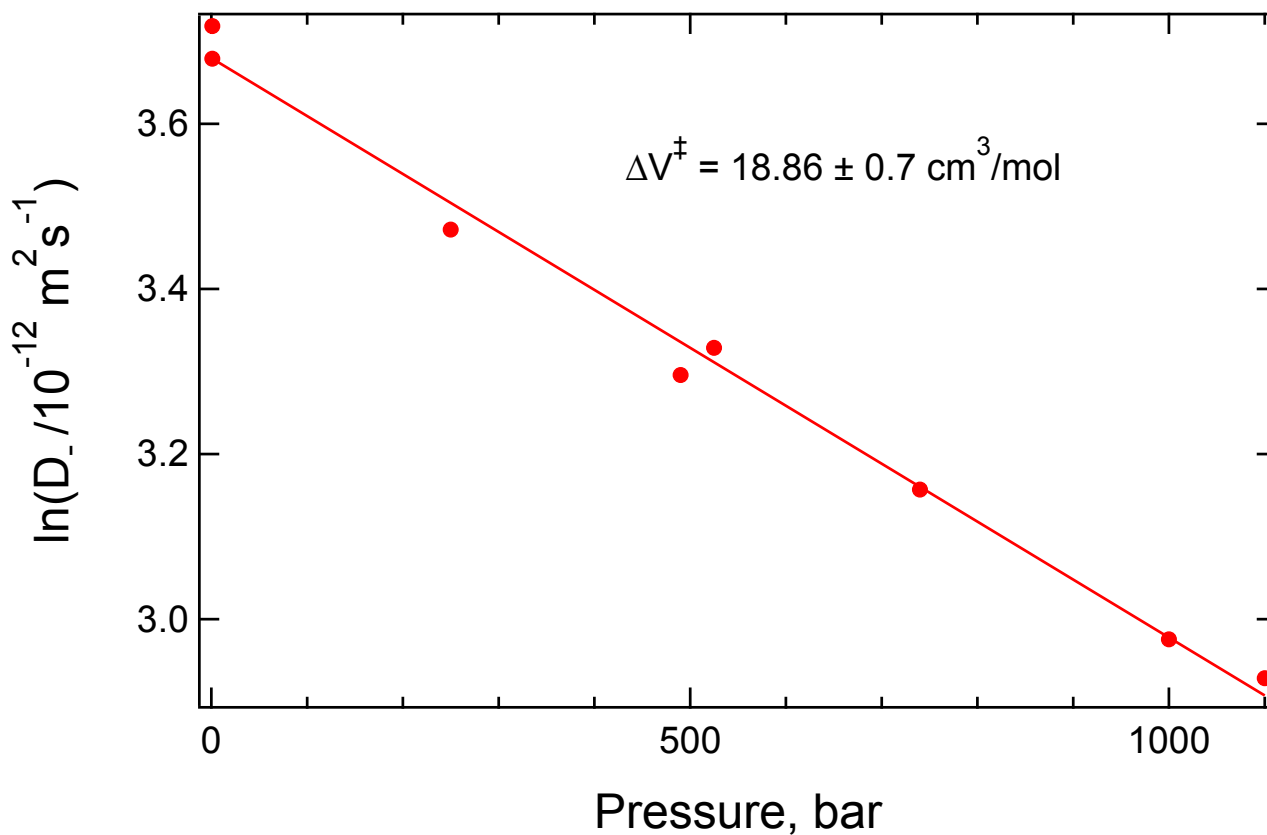

| Point | Pressure | D (10 <sup>-12</sup> m <sup>2</sup> /s) | ln(D) |
|-------|----------|-----------------------------------------|-------|
| 0     | 1        | 39.6                                    | 3.679 |
| 1     | 1        | 41.2                                    | 3.718 |
| 2     | 250      | 32.2                                    | 3.472 |
| 3     | 490      | 27.0                                    | 3.296 |
| 4     | 525      | 27.9                                    | 3.329 |
| 5     | 740      | 23.5                                    | 3.157 |
| 6     | 1000     | 19.6                                    | 2.976 |
| 7     | 1100     | 18.7                                    | 2.929 |

$\ln(D)$  vs. Pressure Plot for  $\text{BF}_4$  diffusion in BMIM  $\text{BF}_4$  at 75 °C  
 Data from Harris et al. 10.1021/jp8021375

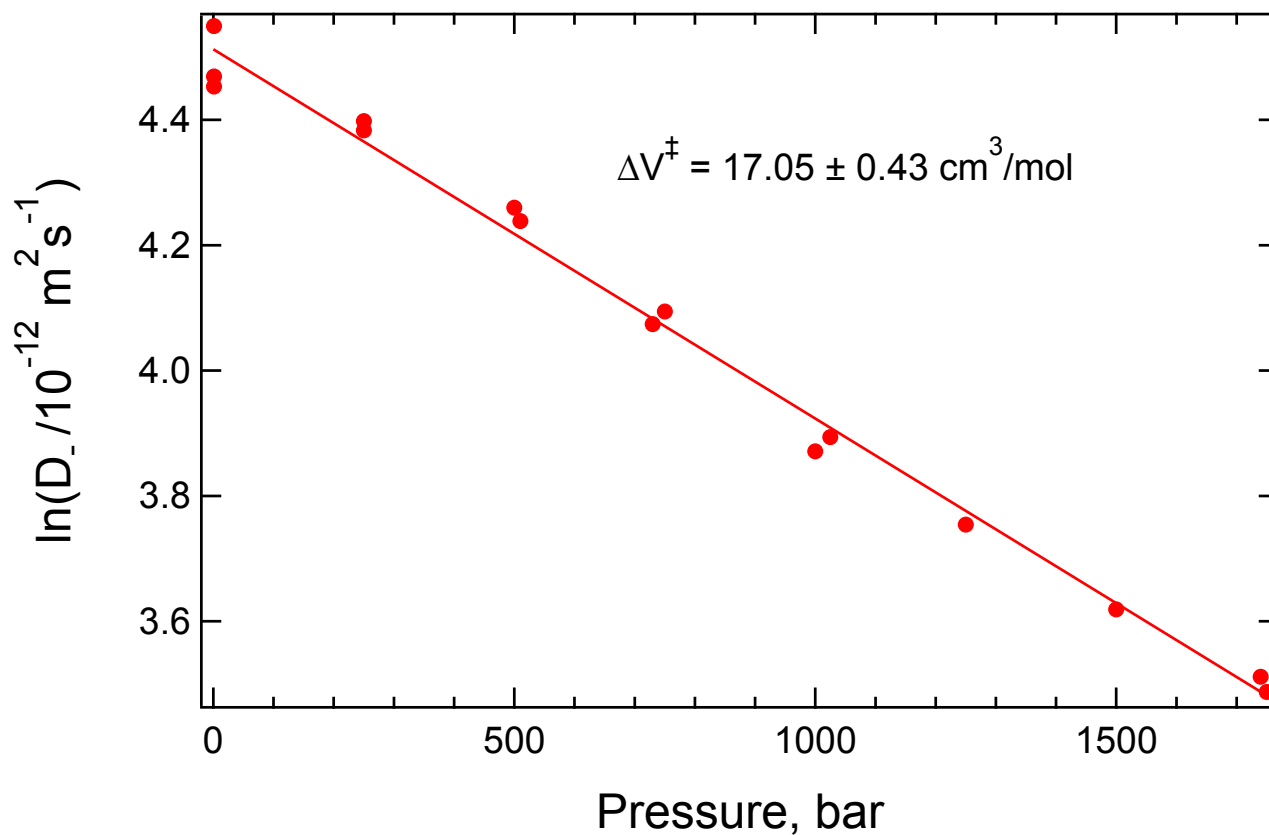

| Point | Pressure | D (10 <sup>-12</sup> m <sup>2</sup> /s) | ln(D) |
|-------|----------|-----------------------------------------|-------|
| 0     | 1        | 87.3                                    | 4.469 |
| 1     | 1        | 85.9                                    | 4.453 |
| 2     | 1        | 94.6                                    | 4.550 |
| 3     | 250      | 81.3                                    | 4.398 |
| 4     | 250      | 80.1                                    | 4.383 |
| 5     | 500      | 70.8                                    | 4.260 |
| 6     | 510      | 69.3                                    | 4.238 |
| 7     | 730      | 58.8                                    | 4.074 |
| 8     | 750      | 60.0                                    | 4.094 |
| 9     | 1000     | 48.0                                    | 3.871 |
| 10    | 1025     | 49.1                                    | 3.894 |
| 11    | 1250     | 42.7                                    | 3.754 |
| 12    | 1500     | 37.3                                    | 3.619 |
| 13    | 1740     | 33.5                                    | 3.512 |
| 14    | 1750     | 32.7                                    | 3.487 |

In(D<sub>-</sub>) vs. Pressure Plot for BF<sub>4</sub> diffusion in OMIM BF<sub>4</sub> at 50 °C  
 Data from Harris et al. 10.1021/jp8021375

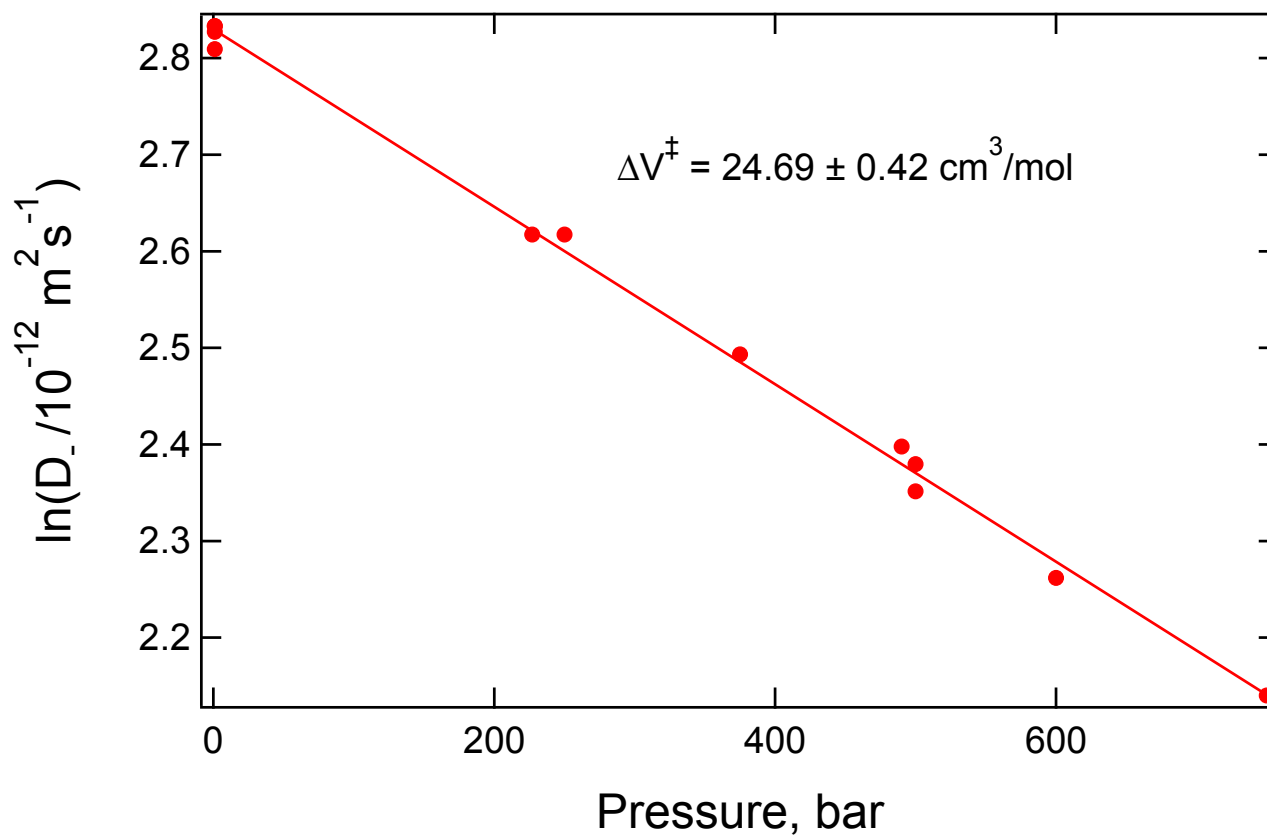

| Point | Pressure | D (10 <sup>-12</sup> m <sup>2</sup> /s) | ln(D) |
|-------|----------|-----------------------------------------|-------|
| 0     | 1        | 16.9                                    | 2.827 |
| 1     | 1        | 17.0                                    | 2.833 |
| 2     | 250      | 13.7                                    | 2.617 |
| 3     | 375      | 12.1                                    | 2.493 |
| 4     | 490      | 11.0                                    | 2.398 |
| 5     | 500      | 10.8                                    | 2.380 |
| 6     | 1        | 16.6                                    | 2.809 |
| 7     | 1        | 17.0                                    | 2.833 |
| 8     | 227      | 13.7                                    | 2.617 |
| 9     | 500      | 10.5                                    | 2.351 |
| 10    | 600      | 9.6                                     | 2.262 |
| 11    | 750      | 8.5                                     | 2.140 |

In(D<sub>-</sub>) vs. Pressure Plot for BF<sub>4</sub> diffusion in OMIM BF<sub>4</sub> at 60 °C  
 Data from Harris et al. 10.1021/jp8021375

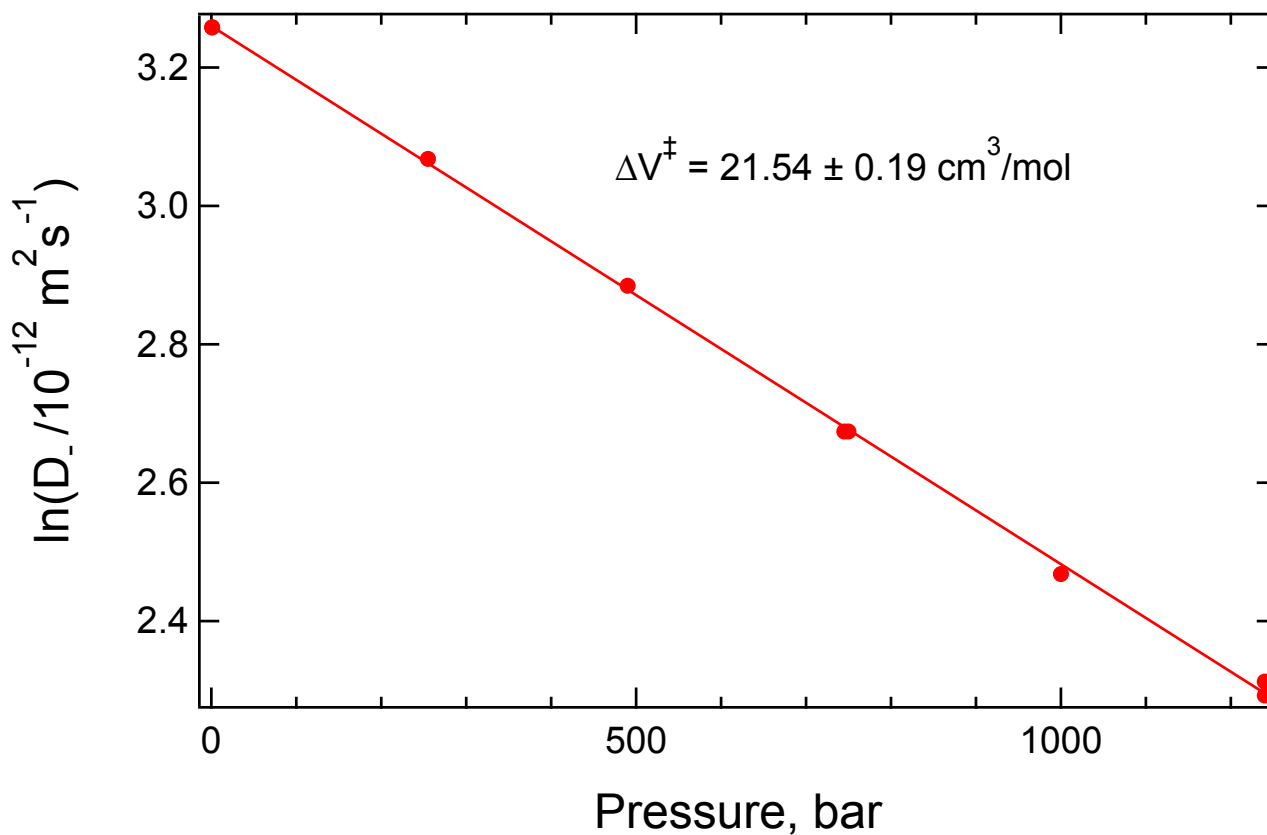

| Point | Pressure | D (10 <sup>-12</sup> m <sup>2</sup> /s) | ln(D) |
|-------|----------|-----------------------------------------|-------|
| 0     | 1        | 26.0                                    | 3.258 |
| 1     | 1        | 26.0                                    | 3.258 |
| 2     | 255      | 21.5                                    | 3.068 |
| 3     | 490      | 17.9                                    | 2.885 |
| 4     | 745      | 14.5                                    | 2.674 |
| 5     | 750      | 14.5                                    | 2.674 |
| 6     | 1000     | 11.8                                    | 2.468 |
| 7     | 1240     | 10.1                                    | 2.313 |
| 8     | 1240     | 9.9                                     | 2.293 |

In(D<sub>-</sub>) vs. Pressure Plot for BF<sub>4</sub> diffusion in OMIM BF<sub>4</sub> at 75 °C  
 Data from Harris et al. 10.1021/jp8021375

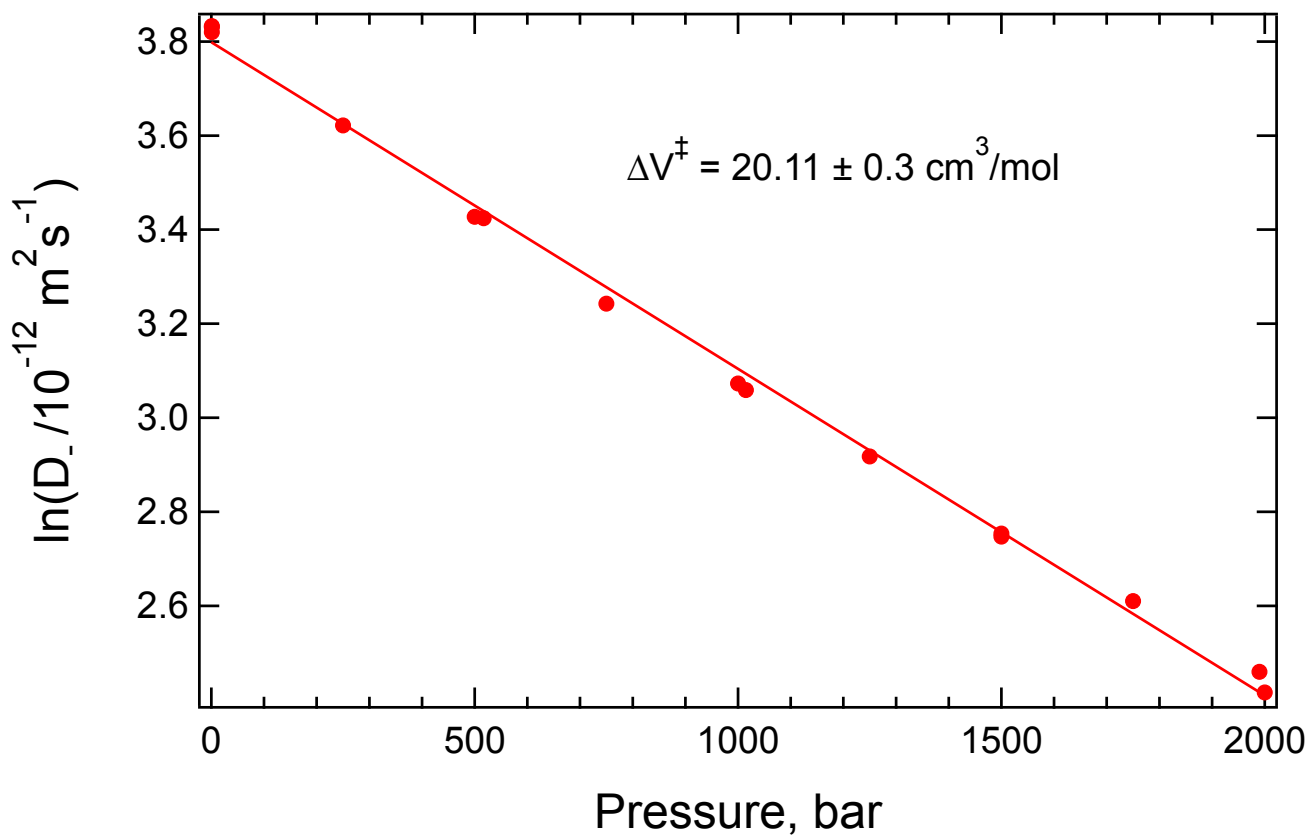

| Point | Pressure | D (10 <sup>-12</sup> m <sup>2</sup> /s) | ln(D) |
|-------|----------|-----------------------------------------|-------|
| 0     | 1        | 46.2                                    | 3.833 |
| 1     | 1        | 45.6                                    | 3.820 |
| 2     | 1        | 46.1                                    | 3.831 |
| 3     | 250      | 37.4                                    | 3.622 |
| 4     | 500      | 30.8                                    | 3.428 |
| 5     | 517      | 30.7                                    | 3.424 |
| 6     | 750      | 25.6                                    | 3.243 |
| 7     | 1000     | 21.6                                    | 3.073 |
| 8     | 1015     | 21.3                                    | 3.059 |
| 9     | 1250     | 18.5                                    | 2.918 |
| 10    | 1500     | 15.7                                    | 2.754 |
| 11    | 1500     | 15.6                                    | 2.747 |
| 12    | 1750     | 13.6                                    | 2.610 |
| 13    | 1990     | 11.7                                    | 2.460 |
| 14    | 2000     | 11.2                                    | 2.416 |

In(D<sub>-</sub>) vs. Pressure Plot for PF<sub>6</sub> diffusion in BMIM PF<sub>6</sub> at 50 °C  
 Data from Kanakubo et al. 10.1021/jp063278k

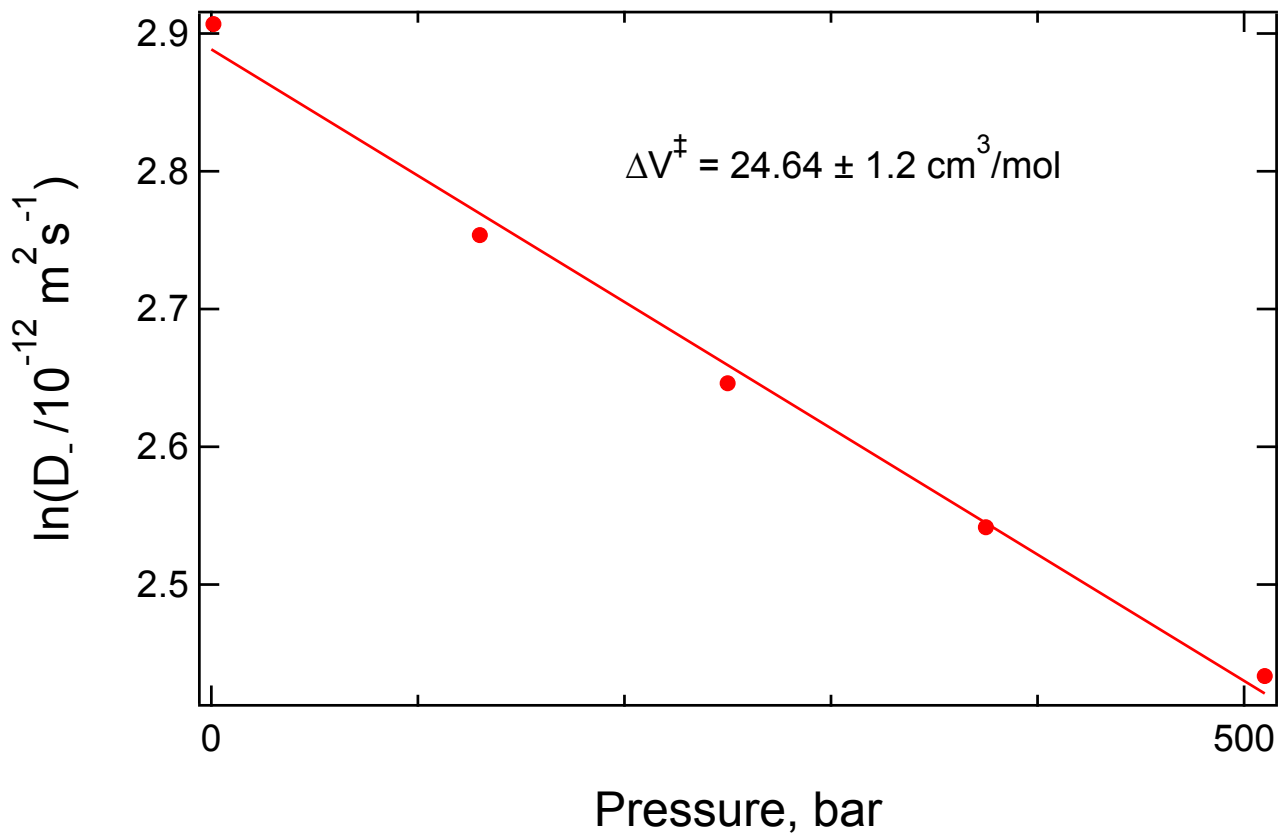

| Point | Pressure | D (10 <sup>-12</sup> m <sup>2</sup> /s) | ln(D) |
|-------|----------|-----------------------------------------|-------|
| 0     | 1        | 18.3                                    | 2.907 |
| 1     | 130      | 15.7                                    | 2.754 |
| 2     | 250      | 14.1                                    | 2.646 |
| 3     | 375      | 12.7                                    | 2.542 |
| 4     | 510      | 11.4                                    | 2.434 |



# ln(D<sub>-</sub>) vs. Pressure Plot for PF<sub>6</sub> diffusion in BMIM PF<sub>6</sub> at 70 °C

Data from Kanakubo et al. 10.1021/jp063278k

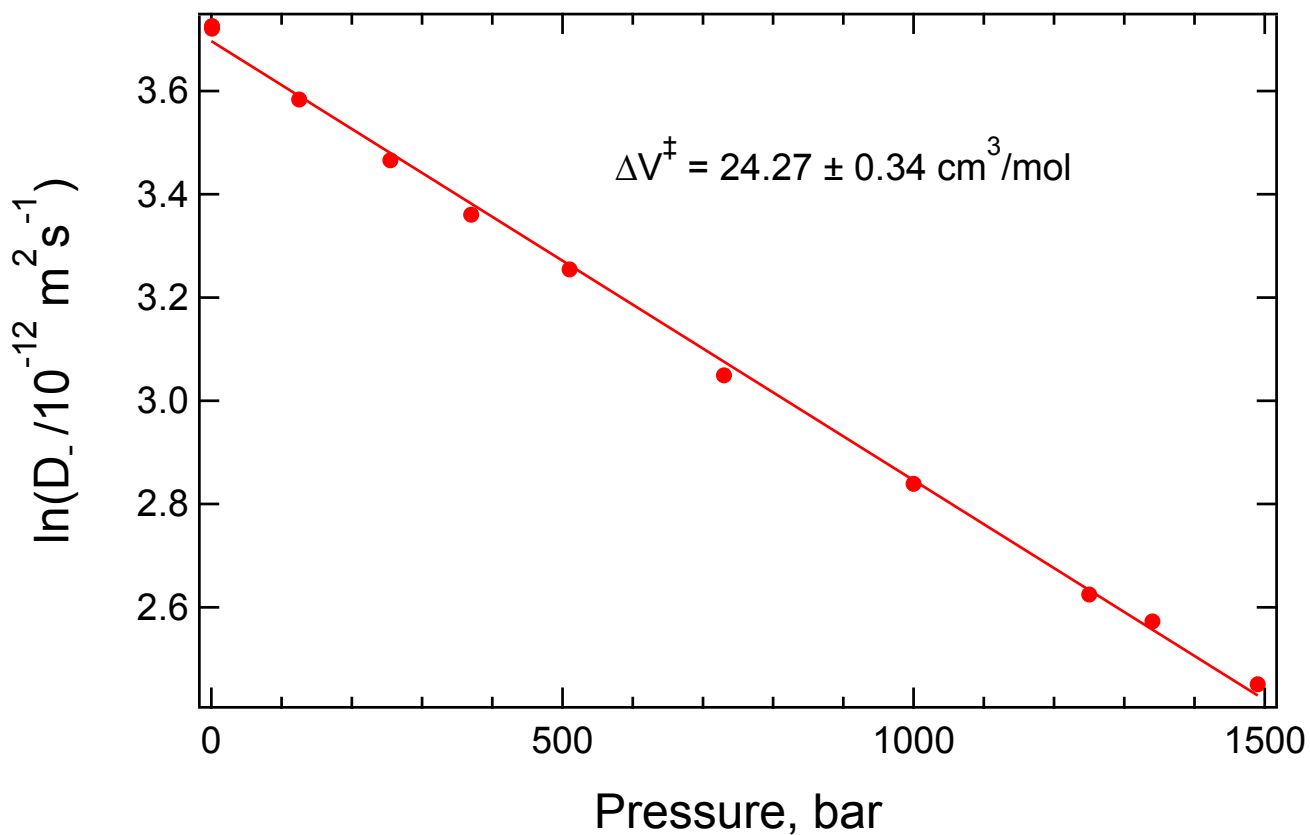

| Point | Pressure | D (10 <sup>-12</sup> m <sup>2</sup> /s) | ln(D) |
|-------|----------|-----------------------------------------|-------|
| 0     | 1        | 41.3                                    | 3.721 |
| 1     | 1        | 41.5                                    | 3.726 |
| 2     | 125      | 36.0                                    | 3.584 |
| 3     | 255      | 32.0                                    | 3.466 |
| 4     | 370      | 28.8                                    | 3.360 |
| 5     | 510      | 25.9                                    | 3.254 |
| 6     | 730      | 21.1                                    | 3.049 |
| 7     | 1000     | 17.1                                    | 2.839 |
| 8     | 1250     | 13.8                                    | 2.625 |
| 9     | 1340     | 13.1                                    | 2.573 |
| 10    | 1490     | 11.6                                    | 2.451 |

In(D<sub>-</sub>) vs. Pressure Plot for PF<sub>6</sub> diffusion in hmim PF<sub>6</sub> at 50 °C  
 Data from Harris et al. 10.1021/jp8021375

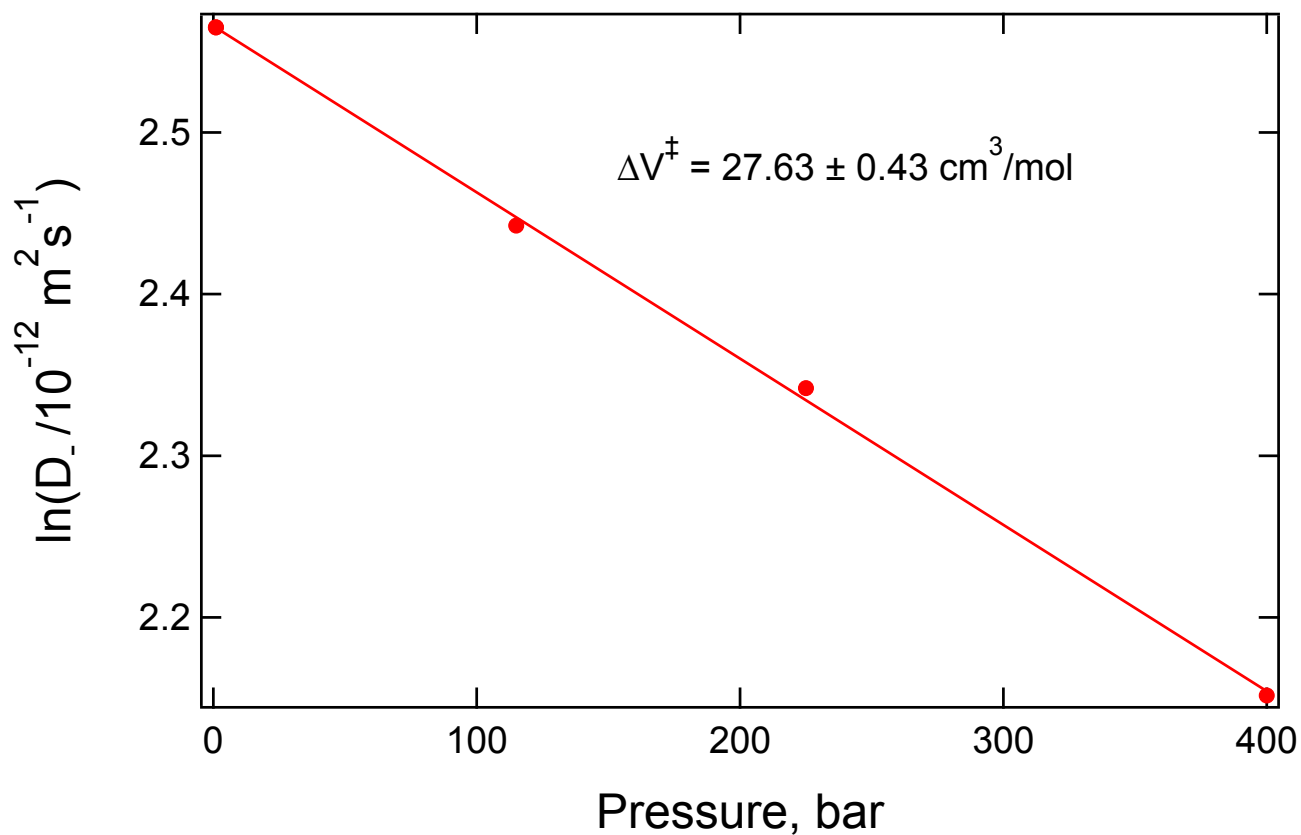

| Point | Pressure | D (10 <sup>-12</sup> m <sup>2</sup> /s) | ln(D) |
|-------|----------|-----------------------------------------|-------|
| 0     | 1        | 13.0                                    | 2.565 |
| 1     | 1        | 13.0                                    | 2.565 |
| 2     | 115      | 11.5                                    | 2.442 |
| 3     | 225      | 10.4                                    | 2.342 |
| 4     | 400      | 8.6                                     | 2.152 |

In(D<sub>-</sub>) vs. Pressure Plot for PF<sub>6</sub> diffusion in hmim PF<sub>6</sub> at 60 °C  
 Data from Harris et al. 10.1021/jp8021375

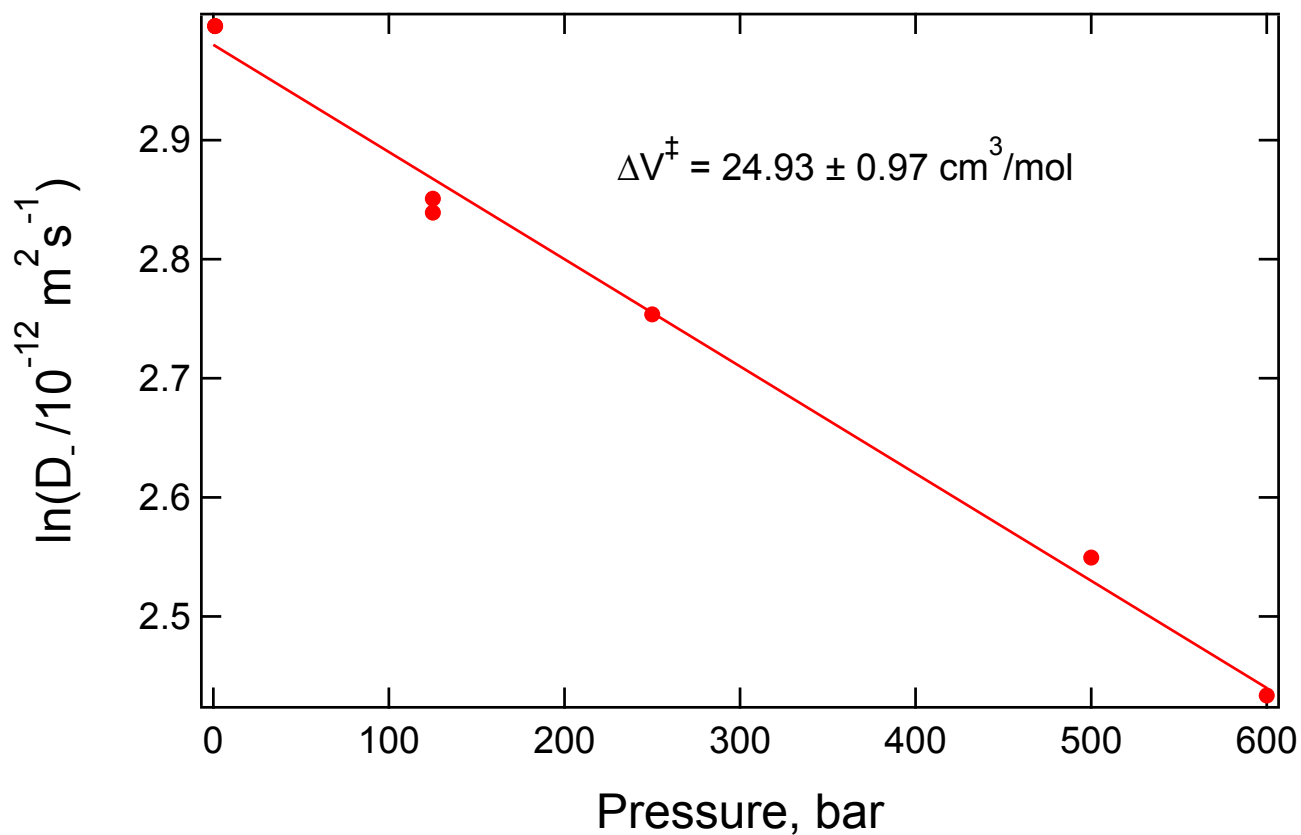

| Point | Pressure | D (10 <sup>-12</sup> m <sup>2</sup> /s) | ln(D) |
|-------|----------|-----------------------------------------|-------|
| 0     | 1        | 20.0                                    | 2.996 |
| 1     | 1        | 20.0                                    | 2.996 |
| 2     | 125      | 17.1                                    | 2.839 |
| 3     | 125      | 17.3                                    | 2.851 |
| 4     | 250      | 15.7                                    | 2.754 |
| 5     | 500      | 12.8                                    | 2.549 |
| 6     | 600      | 11.4                                    | 2.434 |

In(D<sub>-</sub>) vs. Pressure Plot for PF<sub>6</sub> diffusion in hmim PF<sub>6</sub> at 75 °C  
 Data from Harris et al. 10.1021/jp8021375

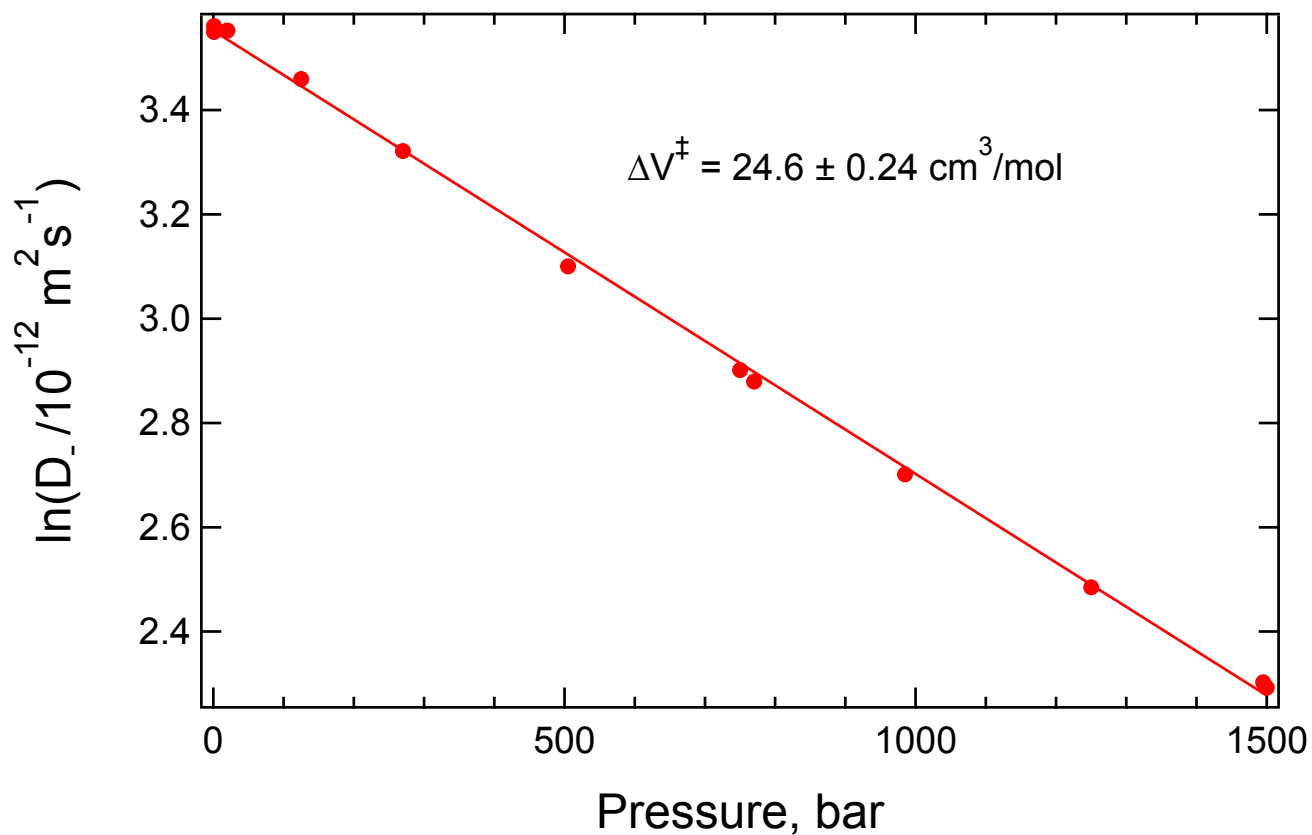

| Point | Pressure | D (10 <sup>-12</sup> m <sup>2</sup> /s) | ln(D) |
|-------|----------|-----------------------------------------|-------|
| 0     | 1        | 35.2                                    | 3.561 |
| 1     | 1        | 34.8                                    | 3.550 |
| 2     | 20       | 34.9                                    | 3.552 |
| 3     | 125      | 31.8                                    | 3.459 |
| 4     | 270      | 27.7                                    | 3.321 |
| 5     | 505      | 22.2                                    | 3.100 |
| 6     | 750      | 18.2                                    | 2.901 |
| 7     | 770      | 17.8                                    | 2.879 |
| 8     | 985      | 14.9                                    | 2.701 |
| 9     | 1250     | 12.0                                    | 2.485 |
| 10    | 1495     | 10.0                                    | 2.303 |
| 11    | 1500     | 9.9                                     | 2.293 |

In(D<sub>-</sub>) vs. Pressure Plot for PF<sub>6</sub> diffusion in OMIM PF<sub>6</sub> at 75 °C  
 Data from Harris et al. 10.1021/jp8021375

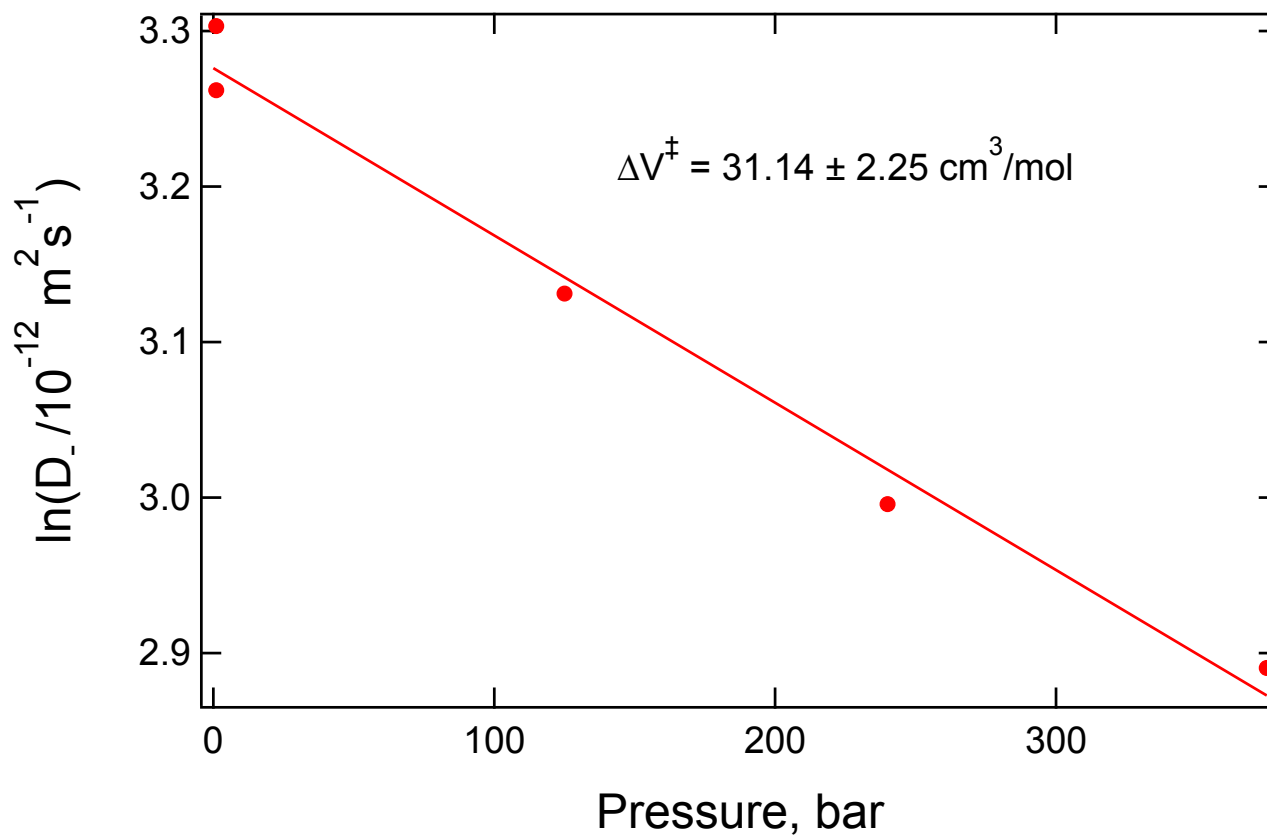

| Point | Pressure | D (10 <sup>-12</sup> m <sup>2</sup> /s) | ln(D) |
|-------|----------|-----------------------------------------|-------|
| 0     | 1        | 26.1                                    | 3.262 |
| 1     | 1        | 27.2                                    | 3.303 |
| 2     | 125      | 22.9                                    | 3.131 |
| 3     | 240      | 20.0                                    | 2.996 |
| 4     | 375      | 18.0                                    | 2.890 |

In(D<sub>-</sub>) vs. Pressure Plot for PF<sub>6</sub> diffusion in OMIM PF<sub>6</sub> at 80 °C  
 Data from Harris et al. 10.1021/jp8021375

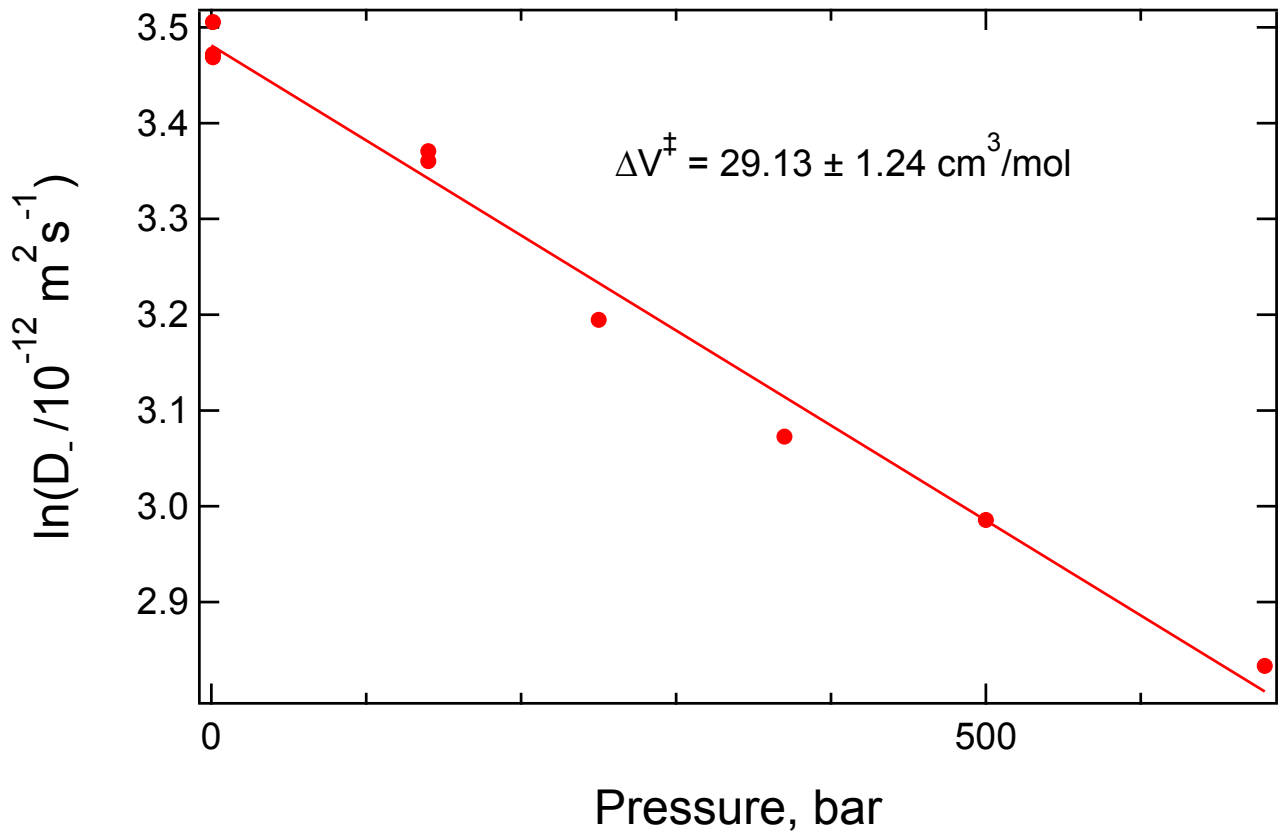

| Point | Pressure | D (10 <sup>-12</sup> m <sup>2</sup> /s) | ln(D) |
|-------|----------|-----------------------------------------|-------|
| 0     | 1        | 32.2                                    | 3.472 |
| 1     | 1        | 32.1                                    | 3.469 |
| 2     | 1        | 33.3                                    | 3.506 |
| 3     | 140      | 29.1                                    | 3.371 |
| 4     | 140      | 28.8                                    | 3.360 |
| 5     | 250      | 24.4                                    | 3.195 |
| 6     | 370      | 21.6                                    | 3.073 |
| 7     | 500      | 19.8                                    | 2.986 |
| 8     | 680      | 17.0                                    | 2.833 |

In(D<sub>-</sub>) vs. Pressure Plot for TFSA diffusion in BMpyrr TFSA at 30 °C  
 Data from Harris et al. 10.1021/je2006049

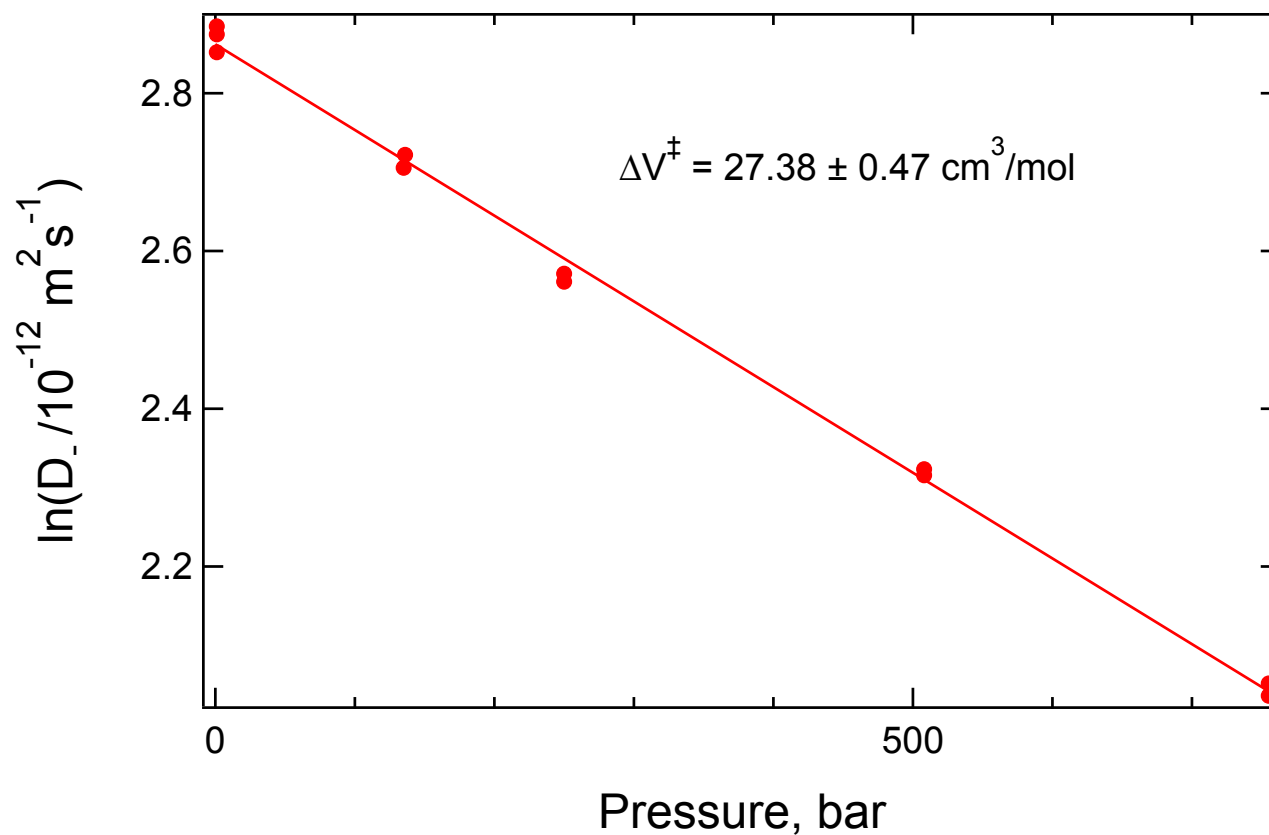

| Point | Pressure | D (10 <sup>-12</sup> m <sup>2</sup> /s) | ln(D) |
|-------|----------|-----------------------------------------|-------|
| 0     | 1        | 17.9                                    | 2.885 |
| 1     | 1        | 17.7                                    | 2.875 |
| 2     | 1        | 17.3                                    | 2.852 |
| 3     | 135      | 15.0                                    | 2.705 |
| 4     | 136      | 15.2                                    | 2.722 |
| 5     | 250      | 12.9                                    | 2.561 |
| 6     | 250      | 13.1                                    | 2.571 |
| 7     | 508      | 10.2                                    | 2.323 |
| 8     | 508      | 10.1                                    | 2.316 |
| 9     | 755      | 7.7                                     | 2.036 |
| 10    | 755      | 7.8                                     | 2.052 |

$\ln(D_)$  vs. Pressure Plot for TFSA diffusion in BMpyrr TFSA at 50 °C  
 Data from Harris et al. 10.1021/je2006049

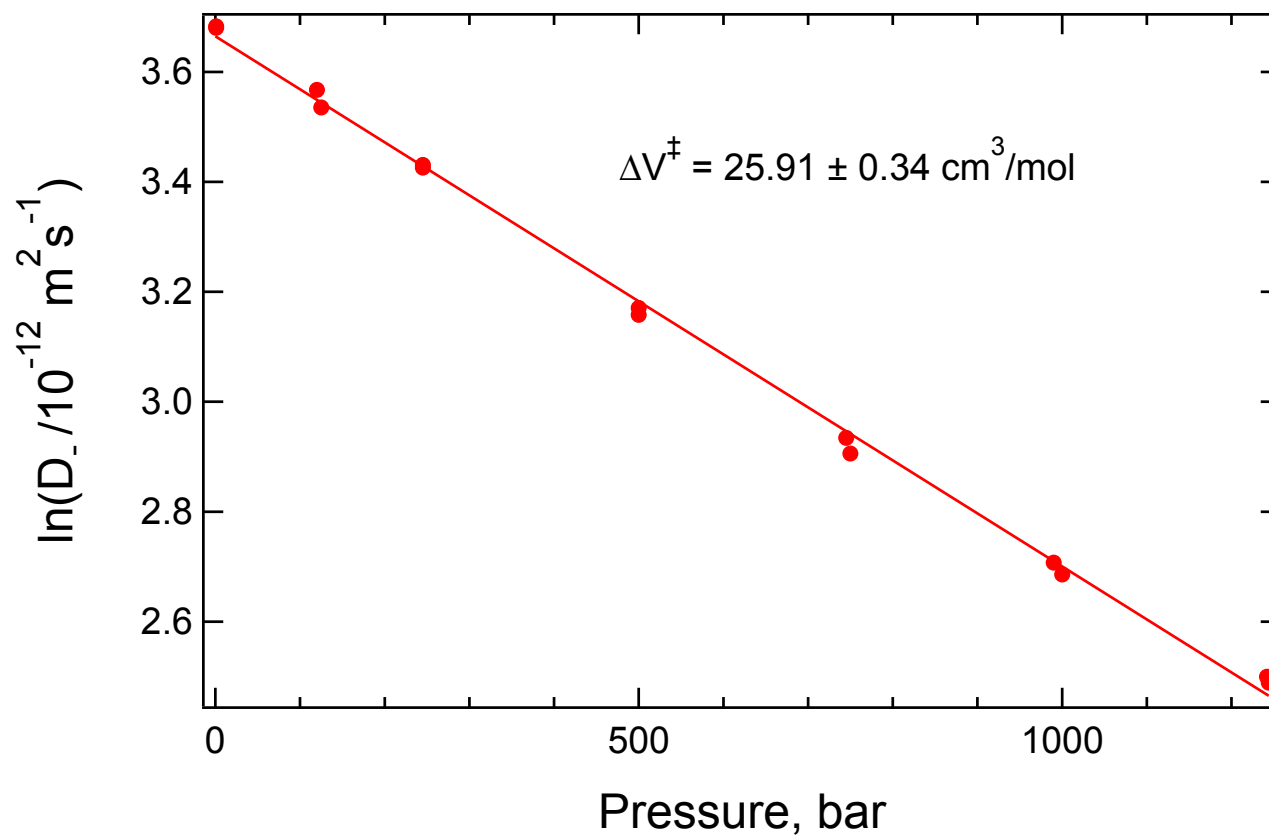

| Point | Pressure | D (10 <sup>-12</sup> m <sup>2</sup> /s) | ln(D) |
|-------|----------|-----------------------------------------|-------|
| 0     | 1        | 39.8                                    | 3.683 |
| 1     | 1        | 39.7                                    | 3.680 |
| 2     | 120      | 35.4                                    | 3.567 |
| 3     | 125      | 34.3                                    | 3.535 |
| 4     | 245      | 30.9                                    | 3.431 |
| 5     | 245      | 30.8                                    | 3.426 |
| 6     | 500      | 23.8                                    | 3.171 |
| 7     | 500      | 23.5                                    | 3.158 |
| 8     | 745      | 18.8                                    | 2.934 |
| 9     | 750      | 18.3                                    | 2.906 |
| 10    | 990      | 15.0                                    | 2.707 |
| 11    | 1000     | 14.7                                    | 2.686 |
| 12    | 1242     | 12.2                                    | 2.500 |
| 13    | 1244     | 12.1                                    | 2.489 |



# ln(D<sub>-</sub>) vs. Pressure Plot for TFSA diffusion in BMpyrr TFSA at 65 °C

Data from Harris et al. 10.1021/je2006049

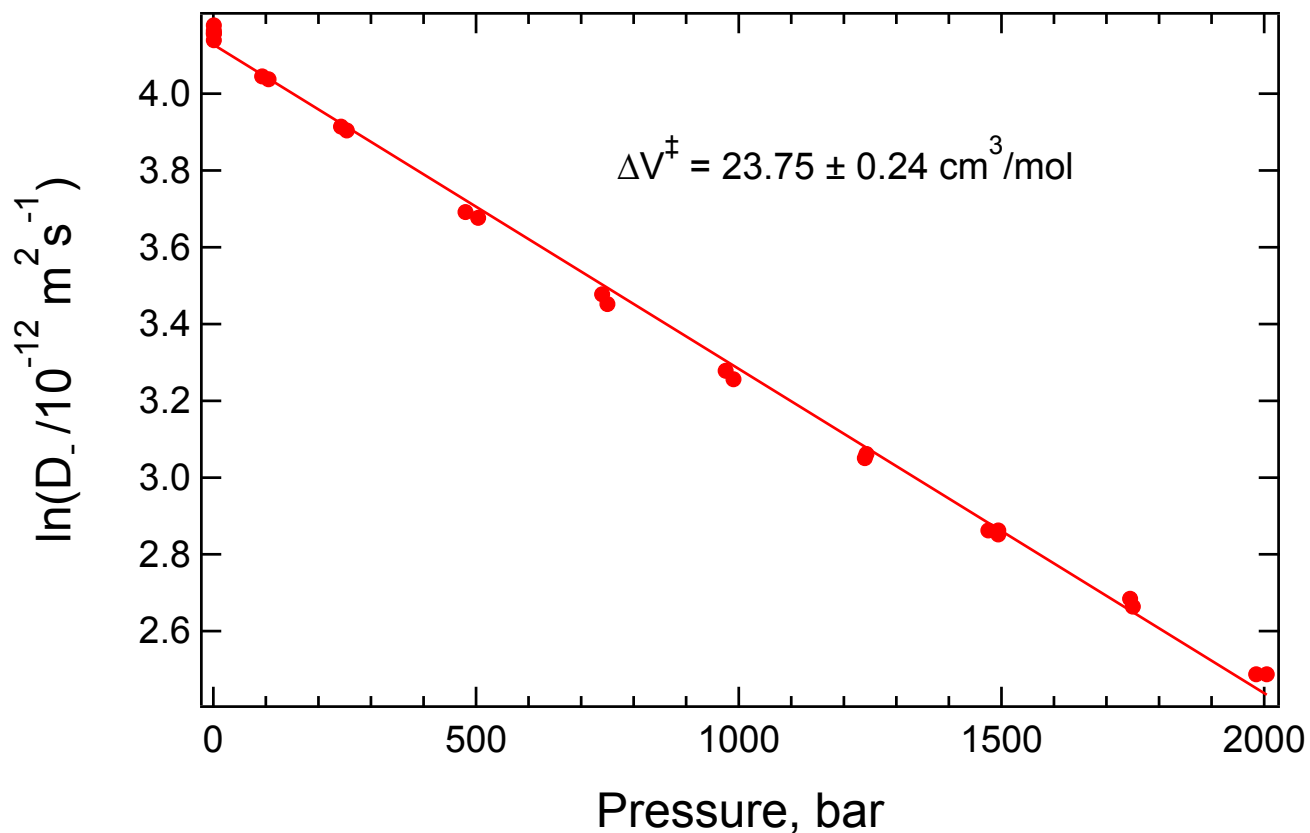

| Point | Pressure | D (10 <sup>-12</sup> m <sup>2</sup> /s) | ln(D) |
|-------|----------|-----------------------------------------|-------|
| 0     | 1        | 63.9                                    | 4.158 |
| 1     | 1        | 63.8                                    | 4.156 |
| 2     | 1        | 62.8                                    | 4.139 |
| 3     | 1        | 65.2                                    | 4.178 |
| 4     | 1        | 64.3                                    | 4.164 |
| 5     | 93       | 57.1                                    | 4.045 |
| 6     | 105      | 56.7                                    | 4.038 |
| 7     | 243      | 50.1                                    | 3.914 |
| 8     | 254      | 49.6                                    | 3.904 |
| 9     | 480      | 40.1                                    | 3.692 |
| 10    | 504      | 39.5                                    | 3.677 |
| 11    | 740      | 32.4                                    | 3.478 |
| 12    | 750      | 31.6                                    | 3.452 |
| 13    | 975      | 26.5                                    | 3.278 |
| 14    | 990      | 26.0                                    | 3.256 |
| 15    | 1240     | 21.1                                    | 3.051 |
| 16    | 1243     | 21.4                                    | 3.062 |
| 17    | 1475     | 17.5                                    | 2.862 |
| 18    | 1494     | 17.5                                    | 2.862 |
| 19    | 1494     | 17.3                                    | 2.852 |
| 20    | 1745     | 14.6                                    | 2.684 |
| 21    | 1750     | 14.4                                    | 2.664 |
| 22    | 1985     | 12.0                                    | 2.487 |
| 23    | 2005     | 12.0                                    | 2.487 |

# ln(D<sub>0</sub>) vs. Pressure Plot for TFSA diffusion in BMpyrr TFSA at 75 °C

Data from Harris et al. 10.1021/je2006049

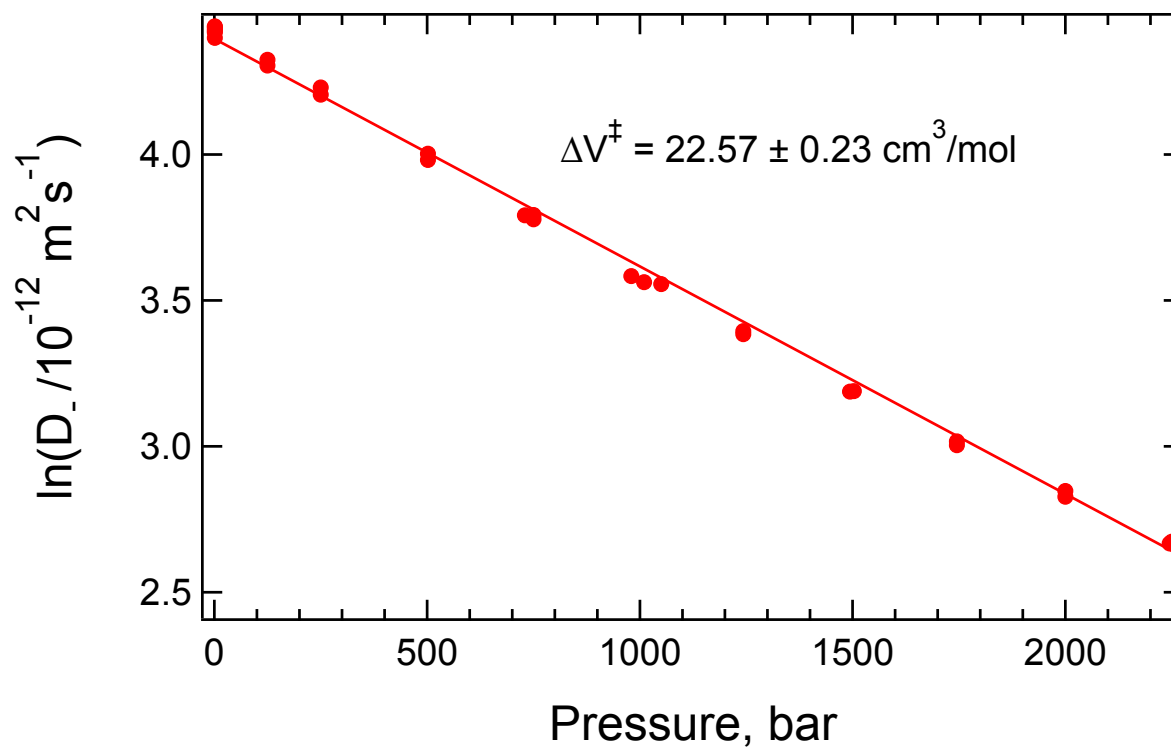

| Point | Pressure | D (10 <sup>-12</sup> m <sup>2</sup> /s) | ln(D) |
|-------|----------|-----------------------------------------|-------|
| 0     | 1        | 83.4                                    | 4.423 |
| 1     | 1        | 83.9                                    | 4.430 |
| 2     | 1        | 81.4                                    | 4.400 |
| 3     | 1        | 82.9                                    | 4.418 |
| 4     | 1        | 84.6                                    | 4.438 |
| 5     | 1        | 84.7                                    | 4.439 |
| 6     | 125      | 75.5                                    | 4.324 |
| 7     | 125      | 74.1                                    | 4.305 |
| 8     | 250      | 67.0                                    | 4.205 |
| 9     | 250      | 68.7                                    | 4.229 |
| 10    | 502      | 54.8                                    | 4.003 |
| 11    | 502      | 53.6                                    | 3.982 |
| 12    | 730      | 44.3                                    | 3.792 |
| 13    | 750      | 44.4                                    | 3.793 |
| 14    | 750      | 43.7                                    | 3.778 |
| 15    | 980      | 36.0                                    | 3.584 |
| 16    | 1010     | 35.3                                    | 3.563 |
| 17    | 1050     | 35.0                                    | 3.556 |
| 18    | 1243     | 29.8                                    | 3.395 |
| 19    | 1243     | 29.5                                    | 3.384 |
| 20    | 1494     | 24.2                                    | 3.188 |
| 21    | 1503     | 24.3                                    | 3.189 |
| 22    | 1745     | 20.4                                    | 3.017 |
| 23    | 1745     | 20.2                                    | 3.004 |
| 24    | 2000     | 17.2                                    | 2.847 |
| 25    | 2000     | 16.9                                    | 2.827 |
| 26    | 2245     | 14.4                                    | 2.667 |
| 27    | 2250     | 14.5                                    | 2.673 |
| 28    | 2500     | 12.4                                    | 2.521 |
| 29    | 2500     | 12.4                                    | 2.519 |

# 1/Viscosity vs. Pressure Plot for BMIM BF<sub>4</sub> at 20 °C

Data from Sanmamed et al. 10.1016/j.jct.2009.11.014

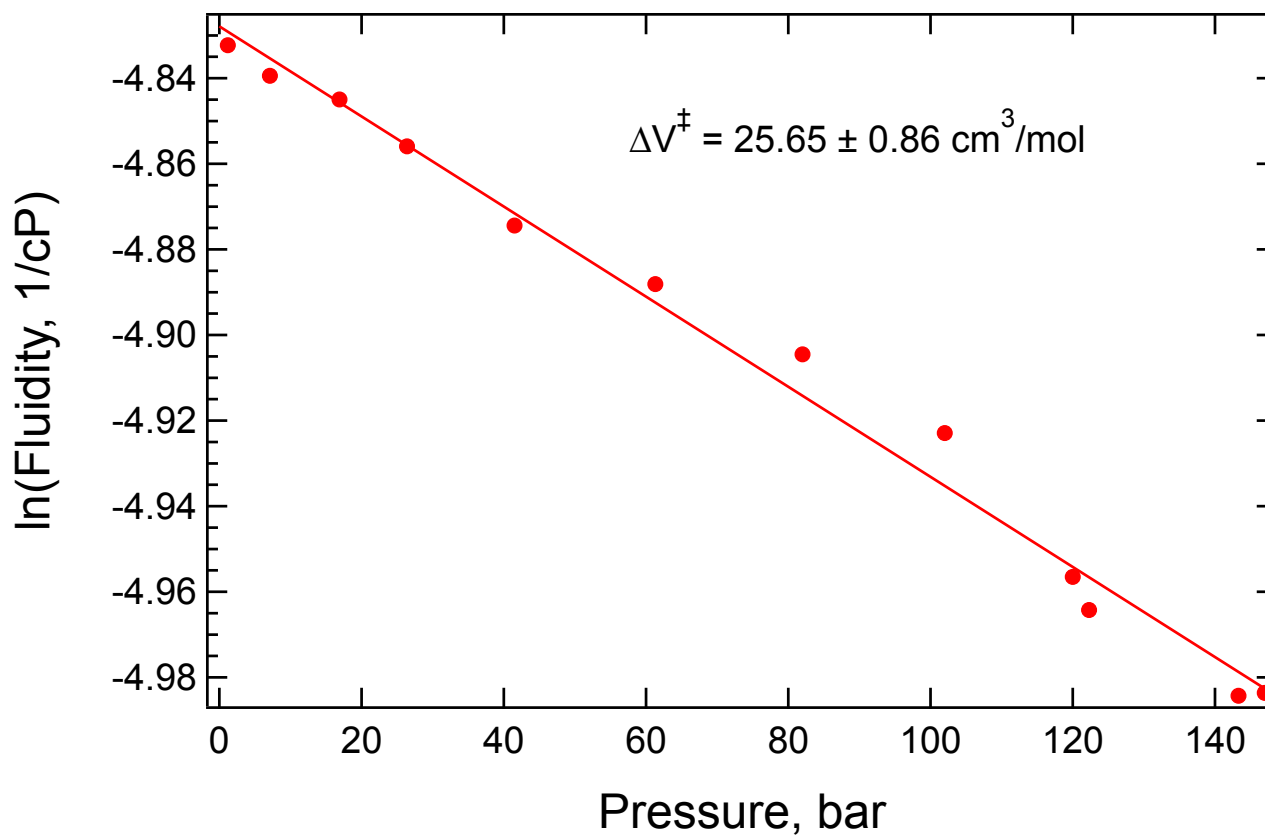

| Point | Pressure | Visc, cP | ln(Fluidity) |
|-------|----------|----------|--------------|
| 0     | 1.2      | 125.5    | -4.832       |
| 1     | 7.1      | 126.4    | -4.839       |
| 2     | 16.9     | 127.1    | -4.845       |
| 3     | 26.4     | 128.5    | -4.856       |
| 4     | 41.5     | 130.9    | -4.874       |
| 5     | 61.3     | 132.7    | -4.888       |
| 6     | 82       | 134.9    | -4.905       |
| 7     | 102      | 137.4    | -4.923       |
| 8     | 120      | 142.1    | -4.957       |
| 9     | 122.3    | 143.2    | -4.964       |
| 10    | 143.3    | 146.1    | -4.984       |
| 11    | 147      | 146      | -4.984       |

# 1/Viscosity vs. Pressure Plot for BMIM BF<sub>4</sub> at 25 °C

Data from Harris et al. 10.1021/je700370z

J. Chem. Eng. Data 2007, 52, 2425-2430

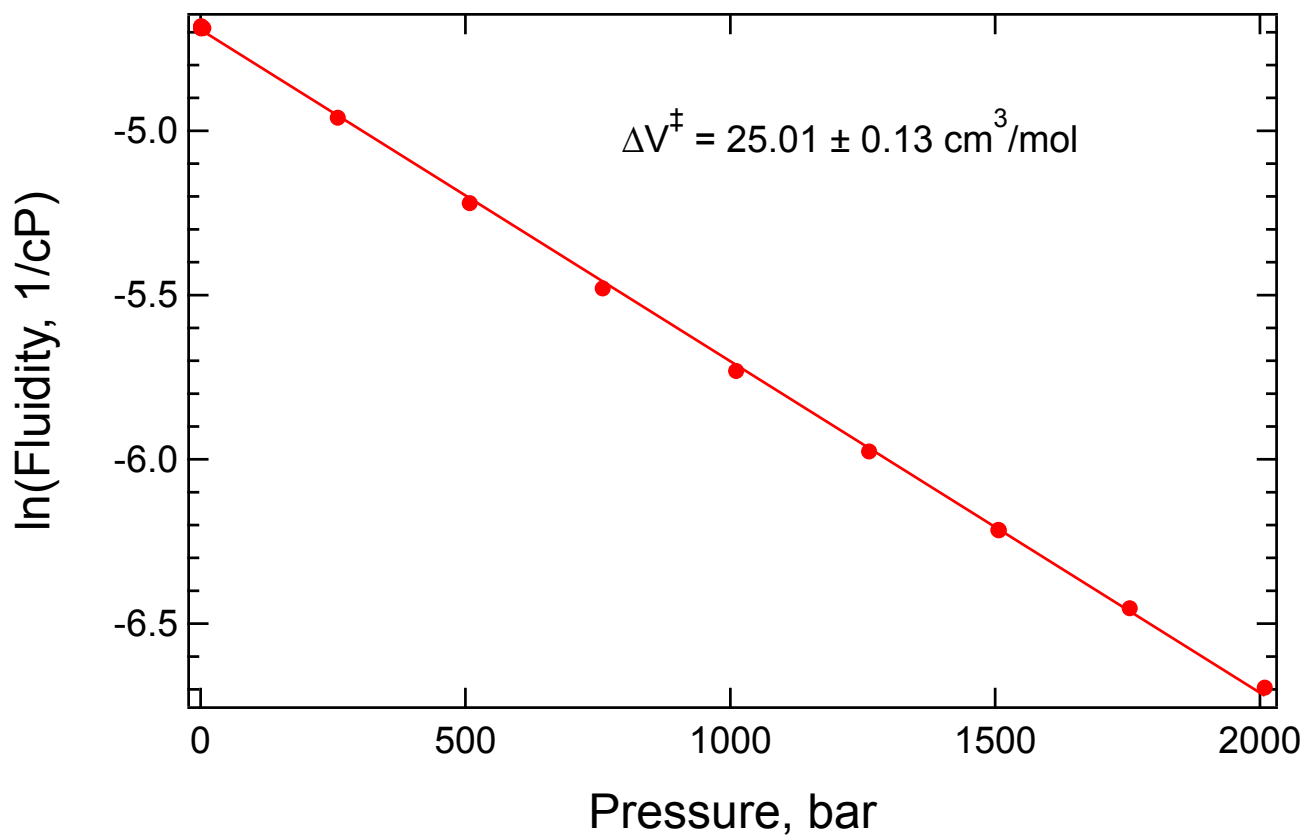

| Point | Pressure | Visc, cP | ln(Fluidity) |
|-------|----------|----------|--------------|
| 0     | 1        | 108      | -4.682       |
| 1     | 1        | 108      | -4.682       |
| 2     | 1        | 108.5    | -4.687       |
| 3     | 1        | 108.7    | -4.689       |
| 4     | 5        | 108.6    | -4.688       |
| 5     | 259      | 142.6    | -4.960       |
| 6     | 508      | 185      | -5.220       |
| 7     | 759      | 239.8    | -5.480       |
| 8     | 1011     | 308.3    | -5.731       |
| 9     | 1262     | 393.9    | -5.976       |
| 10    | 1506     | 499.9    | -6.214       |
| 11    | 1507     | 500.6    | -6.216       |
| 12    | 1754     | 634.7    | -6.453       |
| 13    | 2009     | 808.3    | -6.695       |

# 1/Viscosity vs. Pressure Plot for BMIM BF<sub>4</sub> at 50 °C

Data from Harris et al. 10.1021/je700370z  
J. Chem. Eng. Data 2007, 52, 2425-2430

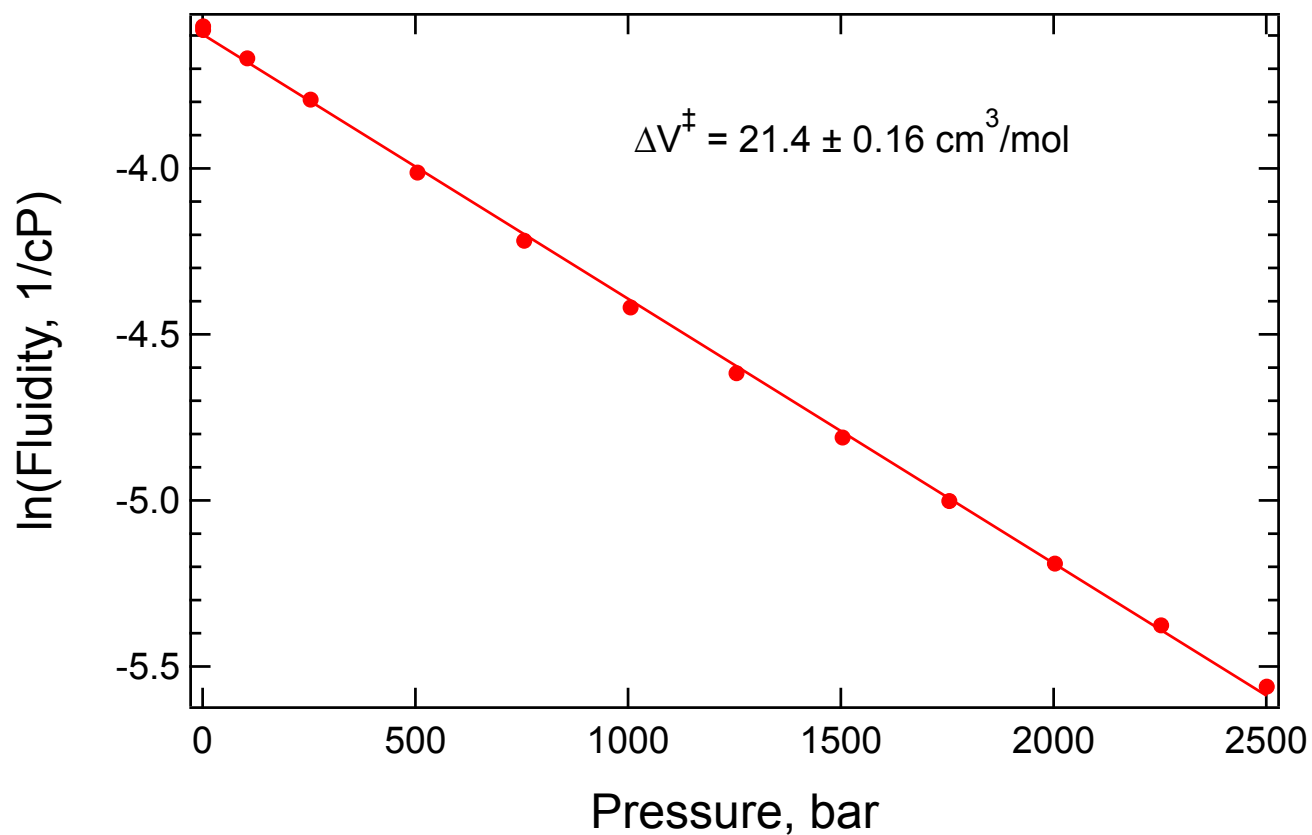

| Point | Pressure | Visc, cP | ln(Fluidity) |
|-------|----------|----------|--------------|
| 0     | 1        | 35.6     | -3.572       |
| 1     | 1        | 36       | -3.584       |
| 2     | 105      | 39.2     | -3.669       |
| 3     | 254      | 44.4     | -3.793       |
| 4     | 505      | 55.3     | -4.013       |
| 5     | 756      | 67.9     | -4.218       |
| 6     | 1006     | 83       | -4.419       |
| 7     | 1255     | 101.2    | -4.617       |
| 8     | 1504     | 122.8    | -4.811       |
| 9     | 1755     | 148.7    | -5.002       |
| 10    | 2003     | 179.5    | -5.190       |
| 11    | 2253     | 216.2    | -5.376       |
| 12    | 2501     | 260      | -5.561       |

# 1/Viscosity vs. Pressure Plot for BMIM BF<sub>4</sub> at 75 °C

Data from Harris et al. 10.1021/je700370z  
J. Chem. Eng. Data 2007, 52, 2425-2430

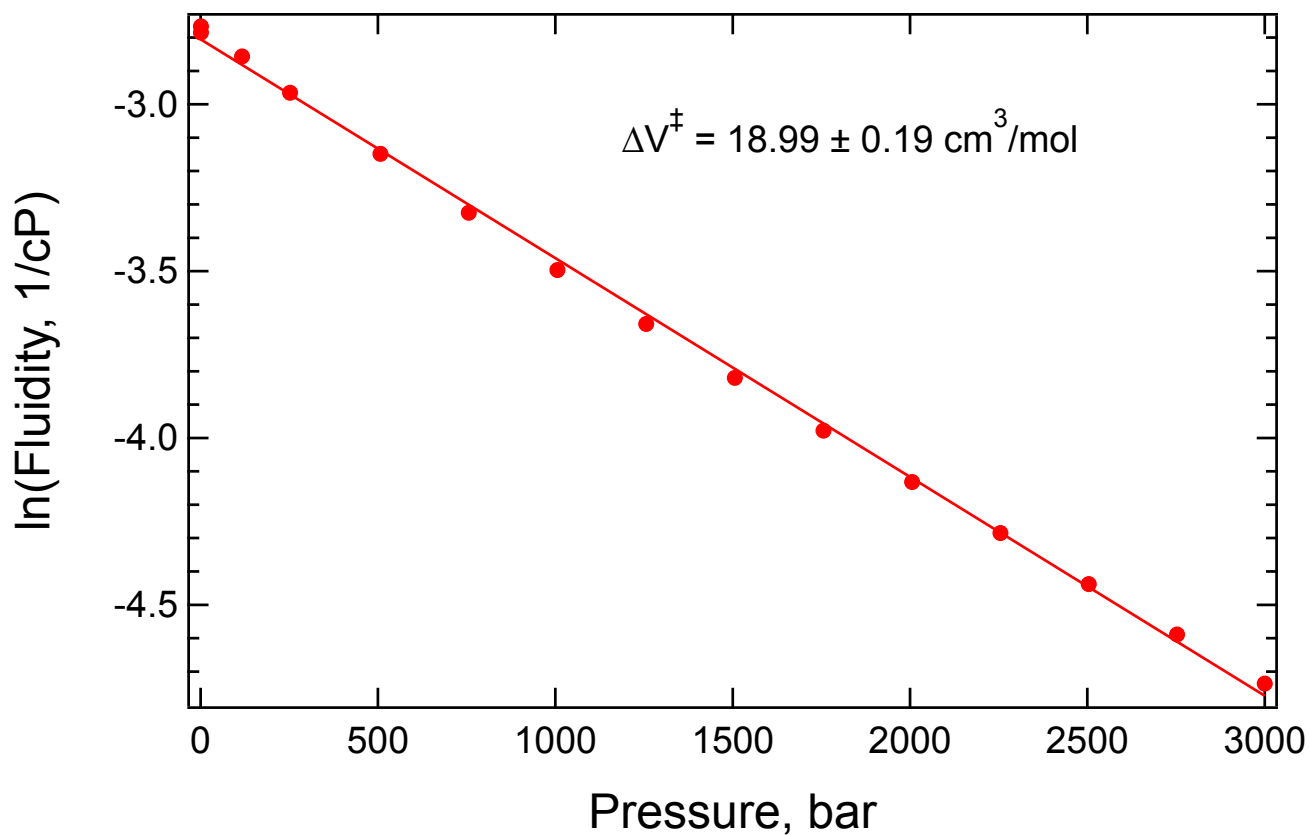

| Point | Pressure | Visc, cP | ln(Fluidity) |
|-------|----------|----------|--------------|
| 0     | 1        | 16.2     | -2.785       |
| 1     | 1        | 15.9     | -2.766       |
| 2     | 117      | 17.4     | -2.856       |
| 3     | 252      | 19.4     | -2.965       |
| 4     | 507      | 23.3     | -3.148       |
| 5     | 756      | 27.8     | -3.325       |
| 6     | 1006     | 33       | -3.497       |
| 7     | 1256     | 38.8     | -3.658       |
| 8     | 1506     | 45.6     | -3.820       |
| 9     | 1756     | 53.4     | -3.978       |
| 10    | 2006     | 62.3     | -4.132       |
| 11    | 2255     | 72.6     | -4.285       |
| 12    | 2504     | 84.6     | -4.438       |
| 13    | 2753     | 98.4     | -4.589       |
| 14    | 3000     | 114      | -4.736       |

# 1/Viscosity vs. Pressure Plot for BMIM PF<sub>6</sub> at 25 °C

Data from Ahosseini and Scurto 10.1007/s10765-008-0497-7

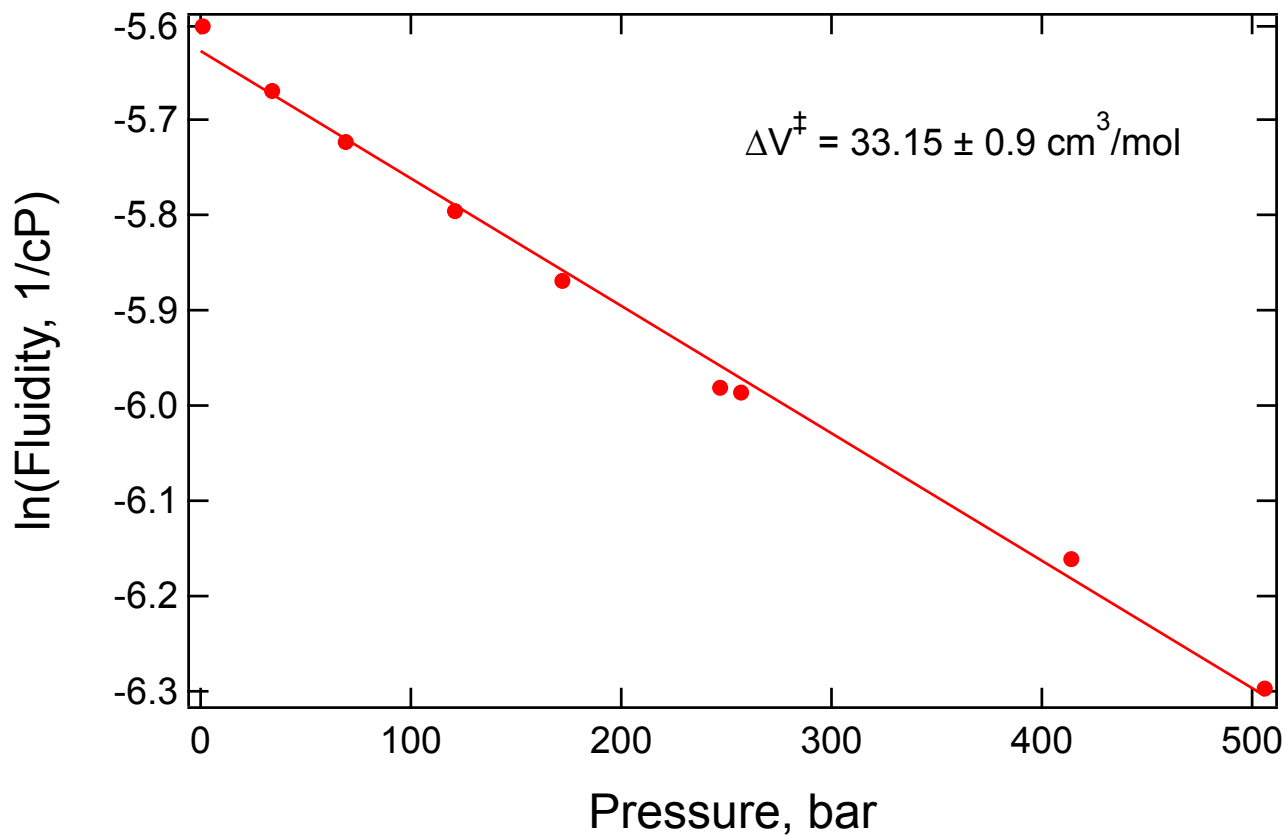

| Point | Pressure | Visc, cP | ln(Fluidity) |
|-------|----------|----------|--------------|
| 0     | 1        | 271      | -5.602       |
| 1     | 34       | 290      | -5.670       |
| 2     | 69       | 306      | -5.724       |
| 3     | 121      | 329      | -5.796       |
| 4     | 172      | 354      | -5.869       |
| 5     | 247      | 396      | -5.981       |
| 6     | 257      | 398      | -5.986       |
| 7     | 414      | 474      | -6.161       |
| 8     | 506      | 543      | -6.297       |

# 1/Viscosity vs. Pressure Plot for BMIM PF<sub>6</sub> at 25 °C

Data from Harris et al. 10.1021/je050147b

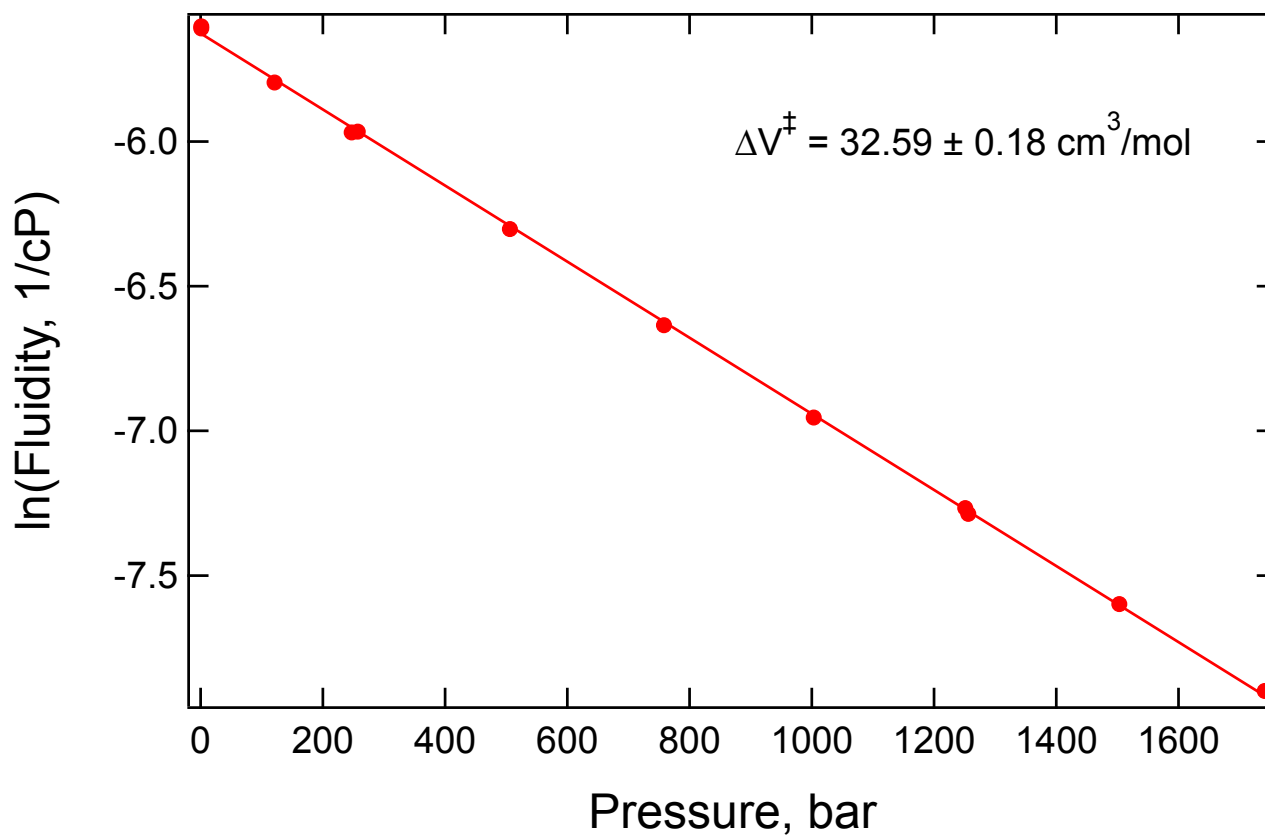

| Point | Pressure | Visc, cP | ln(Fluidity) |
|-------|----------|----------|--------------|
| 0     | 1        | 273      | -5.609       |
| 1     | 1        | 271      | -5.602       |
| 2     | 121      | 329      | -5.796       |
| 3     | 247      | 391      | -5.969       |
| 4     | 257      | 390      | -5.966       |
| 5     | 506      | 546      | -6.303       |
| 6     | 758      | 761      | -6.635       |
| 7     | 1003     | 1047     | -6.954       |
| 8     | 1251     | 1432     | -7.267       |
| 9     | 1256     | 1461     | -7.287       |
| 10    | 1503     | 1995     | -7.598       |
| 11    | 1741     | 2694     | -7.899       |



# 1/Viscosity vs. Pressure Plot for BMIM PF<sub>6</sub> at 50 °C

Data from Harris et al. 10.1021/je050147b

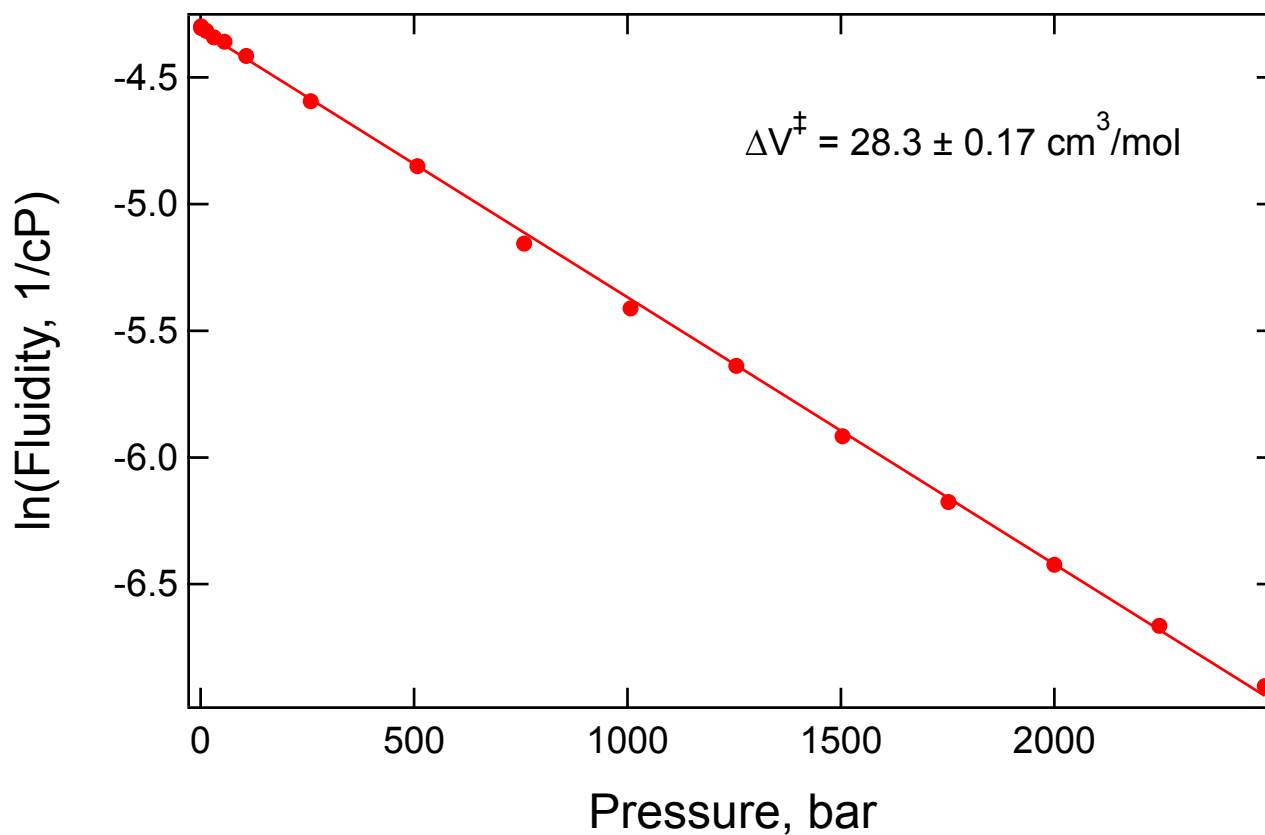

| Point | Pressure | Visc, cP | ln(Fluidity) |
|-------|----------|----------|--------------|
| 0     | 1        | 73.6     | -4.299       |
| 1     | 1        | 74.1     | -4.305       |
| 2     | 13       | 74.9     | -4.316       |
| 3     | 31       | 76.9     | -4.343       |
| 4     | 56       | 78.2     | -4.359       |
| 5     | 107      | 82.7     | -4.415       |
| 6     | 258      | 98.9     | -4.594       |
| 7     | 508      | 127.8    | -4.850       |
| 8     | 758      | 173.5    | -5.156       |
| 9     | 1007     | 224      | -5.412       |
| 10    | 1255     | 281      | -5.638       |
| 11    | 1504     | 371      | -5.916       |
| 12    | 1752     | 481      | -6.176       |
| 13    | 2000     | 616      | -6.423       |
| 14    | 2246     | 784      | -6.664       |
| 15    | 2493     | 995      | -6.903       |

# 1/Viscosity vs. Pressure Plot for BMIM PF<sub>6</sub> at 70 °C

Data from Harris et al. 10.1021/je050147b

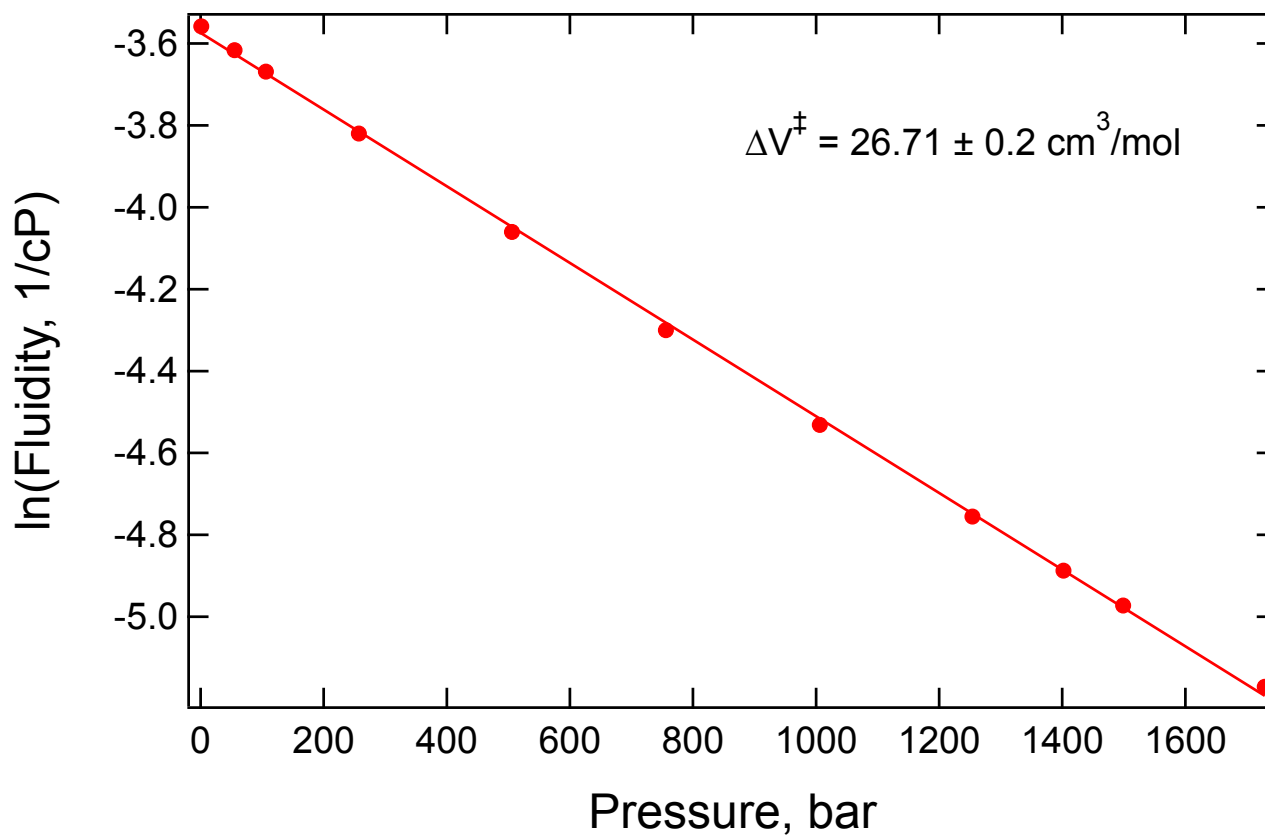

| Point | Pressure | Visc, cP | ln(Fluidity) |
|-------|----------|----------|--------------|
| 0     | 1        | 35.1     | -3.558       |
| 1     | 55       | 37.2     | -3.616       |
| 2     | 106      | 39.2     | -3.669       |
| 3     | 257      | 45.6     | -3.820       |
| 4     | 506      | 58       | -4.060       |
| 5     | 756      | 73.7     | -4.300       |
| 6     | 1006     | 92.9     | -4.532       |
| 7     | 1254     | 116.2    | -4.755       |
| 8     | 1402     | 132.6    | -4.887       |
| 9     | 1499     | 144.4    | -4.973       |
| 10    | 1729     | 176.1    | -5.171       |

# 1/Viscosity vs. Pressure Plot for BMIM TFSA at 25 °C

Data from Harris et al. 10.1021/je700032n

J. Chem. Eng. Data 2007, 52, 1080-1085

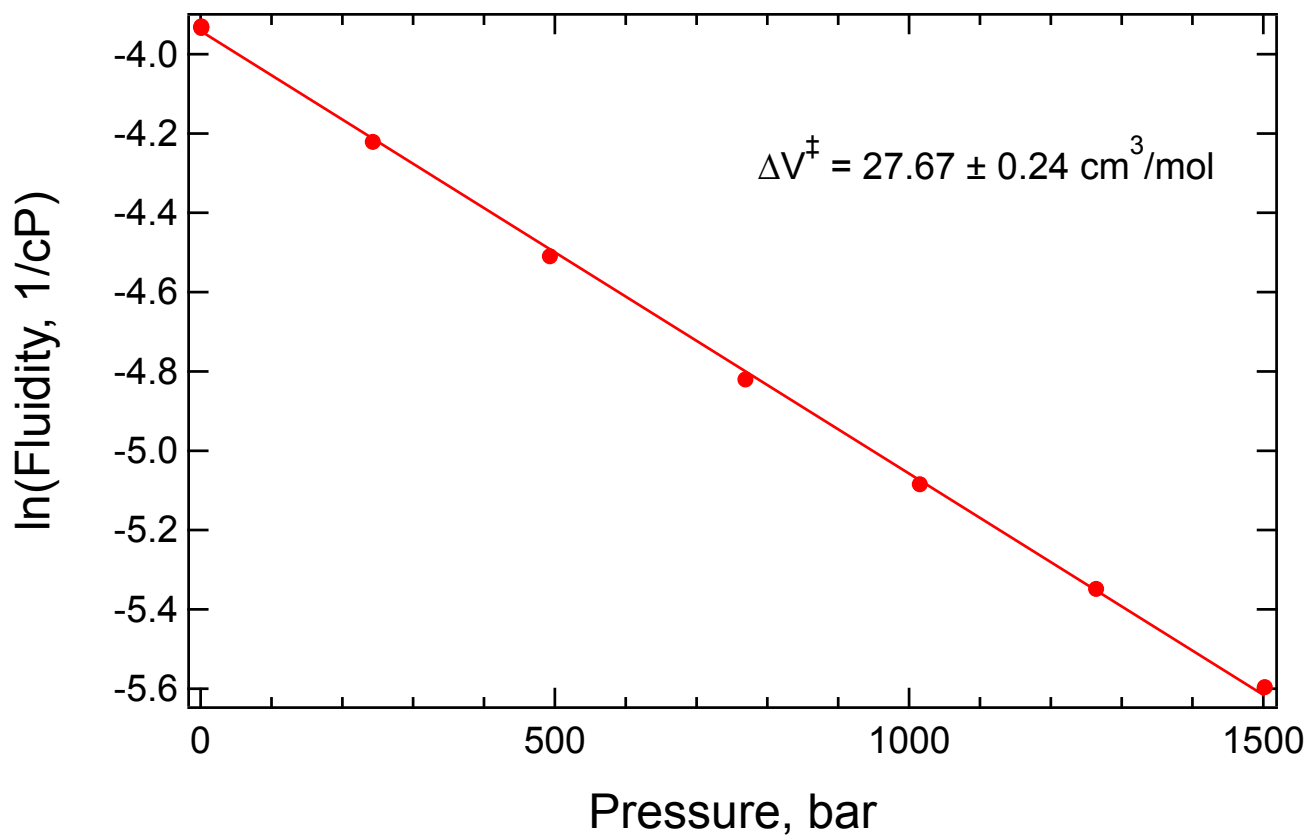

| Point | Pressure | Visc, cP | ln(Fluidity) |
|-------|----------|----------|--------------|
| 0     | 1        | 51       | -3.932       |
| 1     | 1        | 51.1     | -3.934       |
| 2     | 1        | 50.9     | -3.930       |
| 3     | 243      | 68.1     | -4.221       |
| 4     | 493      | 90.9     | -4.510       |
| 5     | 769      | 124      | -4.820       |
| 6     | 1015     | 161.5    | -5.085       |
| 7     | 1264     | 210.3    | -5.349       |
| 8     | 1502     | 269.4    | -5.596       |

# 1/Viscosity vs. Pressure Plot for BMIM TFSA at 50 °C

Data from Harris et al. 10.1021/je700032n

J. Chem. Eng. Data 2007, 52, 1080-1085

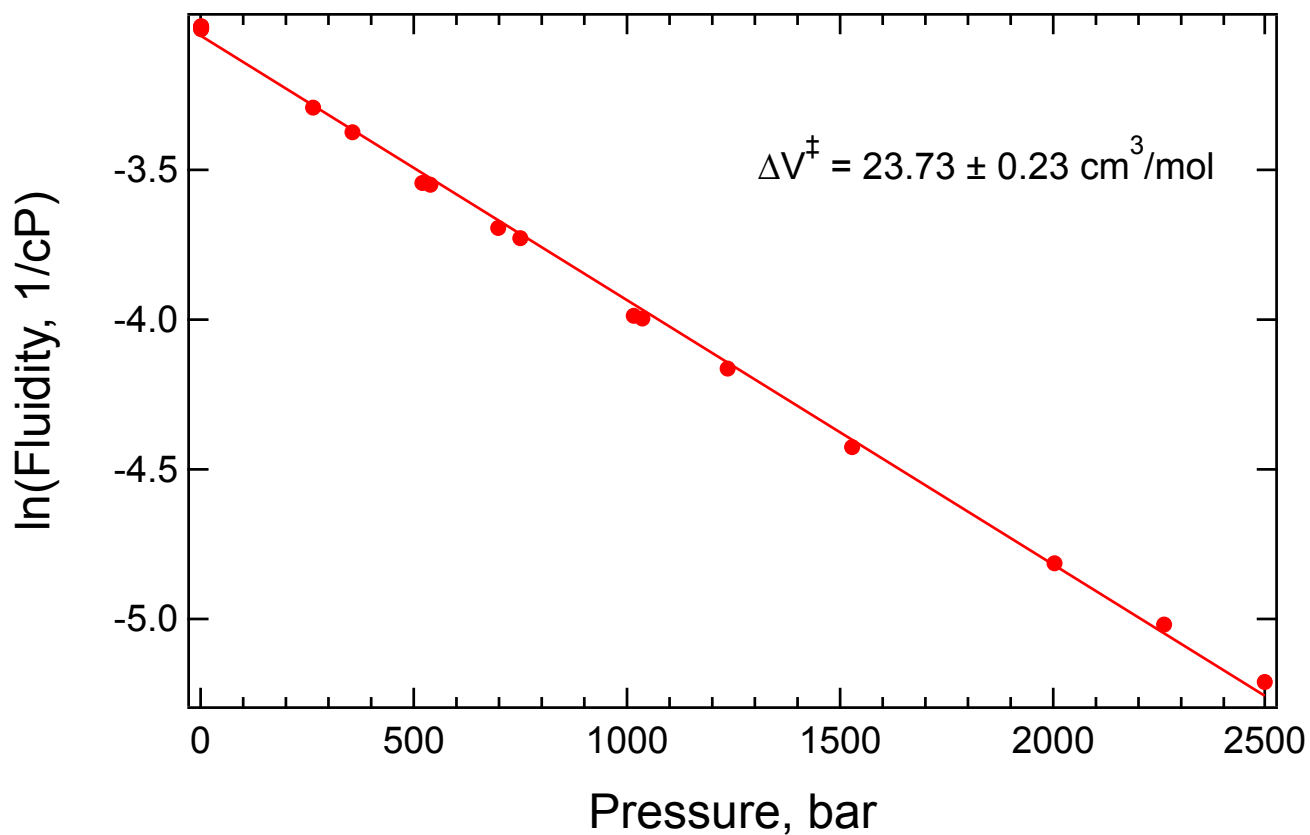

| Point | Pressure | Visc, cP | ln(Fluidity) |
|-------|----------|----------|--------------|
| 0     | 1        | 20.5     | -3.020       |
| 1     | 1        | 20.5     | -3.020       |
| 2     | 264      | 26.9     | -3.292       |
| 3     | 520      | 34.6     | -3.544       |
| 4     | 750      | 41.6     | -3.728       |
| 5     | 1016     | 53.9     | -3.987       |
| 6     | 1528     | 83.6     | -4.426       |
| 7     | 2003     | 123.2    | -4.814       |
| 8     | 2260     | 151.2    | -5.019       |
| 9     | 2496     | 183.2    | -5.211       |
| 10    | 1        | 20.6     | -3.025       |
| 11    | 1        | 20.7     | -3.030       |
| 12    | 1        | 20.6     | -3.025       |
| 13    | 356      | 29.2     | -3.374       |
| 14    | 539      | 34.8     | -3.550       |
| 15    | 698      | 40.2     | -3.694       |
| 16    | 1036     | 54.4     | -3.996       |
| 17    | 1236     | 64.3     | -4.164       |

# 1/Viscosity vs. Pressure Plot for BMIM TFSA at 75 °C

Data from Harris et al. 10.1021/je700032n

J. Chem. Eng. Data 2007, 52, 1080-1085

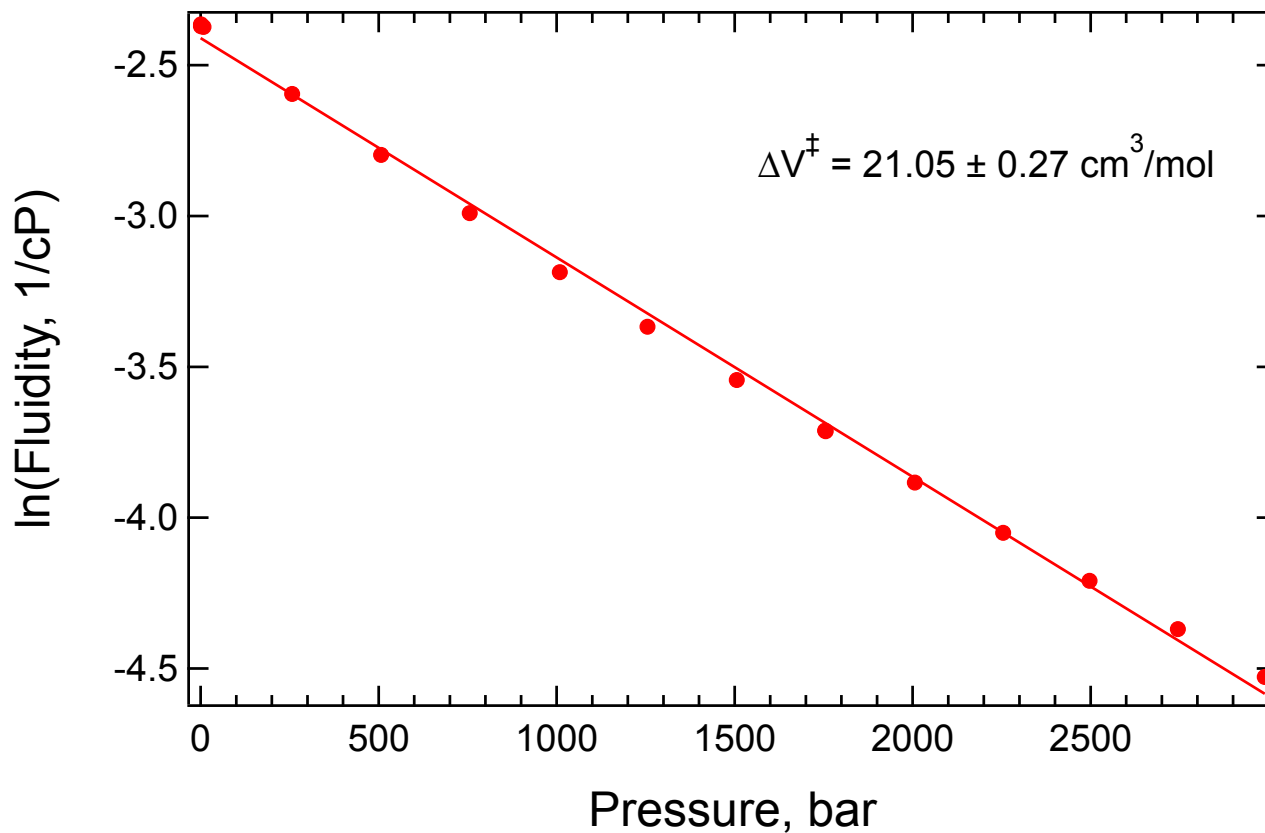

| Point | Pressure | Visc, cP | ln(Fluidity) |
|-------|----------|----------|--------------|
| 0     | 1        | 10.64    | -2.365       |
| 1     | 1        | 10.71    | -2.371       |
| 2     | 8        | 10.73    | -2.373       |
| 3     | 257      | 13.4     | -2.595       |
| 4     | 507      | 16.4     | -2.797       |
| 5     | 756      | 19.9     | -2.991       |
| 6     | 1009     | 24.2     | -3.186       |
| 7     | 1255     | 29       | -3.367       |
| 8     | 1506     | 34.6     | -3.544       |
| 9     | 1754     | 40.9     | -3.711       |
| 10    | 1756     | 41       | -3.714       |
| 11    | 2006     | 48.6     | -3.884       |
| 12    | 2254     | 57.4     | -4.050       |
| 13    | 2497     | 67.3     | -4.209       |
| 14    | 2745     | 79       | -4.369       |
| 15    | 2989     | 92.6     | -4.528       |

# 1/Viscosity vs. Pressure Plot BMMIM FAP at 40 °C

Data from Gacino et al. 10.1016/j.jct.2013.02.014

J. Chem. Thermodynamics 62 (2013) 162–169

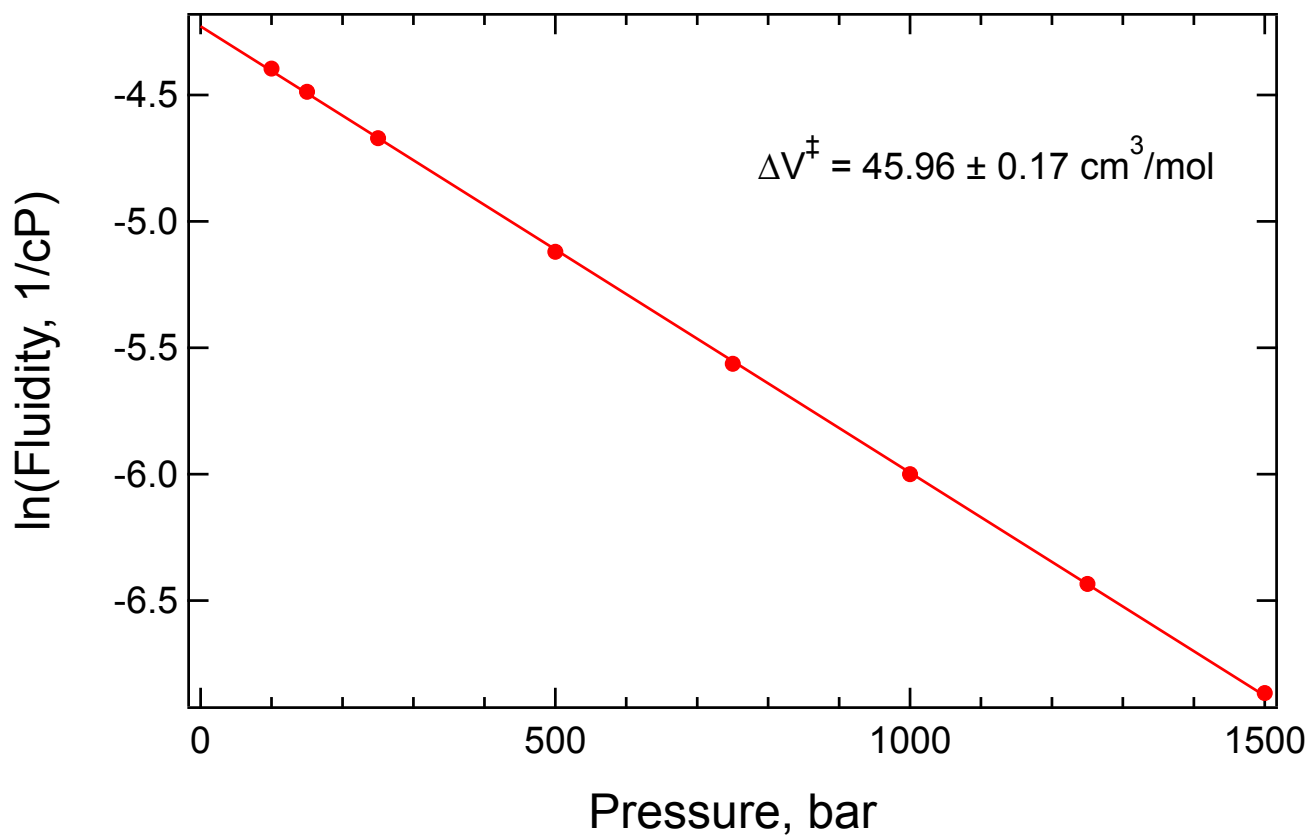

| Point | Pressure | Visc, cP | ln(Fluidity) |
|-------|----------|----------|--------------|
| 0     | 100      | 81.1     | -4.396       |
| 1     | 150      | 88.9     | -4.488       |
| 2     | 250      | 106.8    | -4.671       |
| 3     | 500      | 167.4    | -5.120       |
| 4     | 750      | 260.6    | -5.563       |
| 5     | 1000     | 403.5    | -6.000       |
| 6     | 1250     | 622.7    | -6.434       |
| 7     | 1500     | 958.7    | -6.866       |

# 1/Viscosity vs. Pressure Plot BMMIM FAP at 70 °C

Data from Gacino et al. 10.1016/j.jct.2013.02.014

J. Chem. Thermodynamics 62 (2013) 162–169

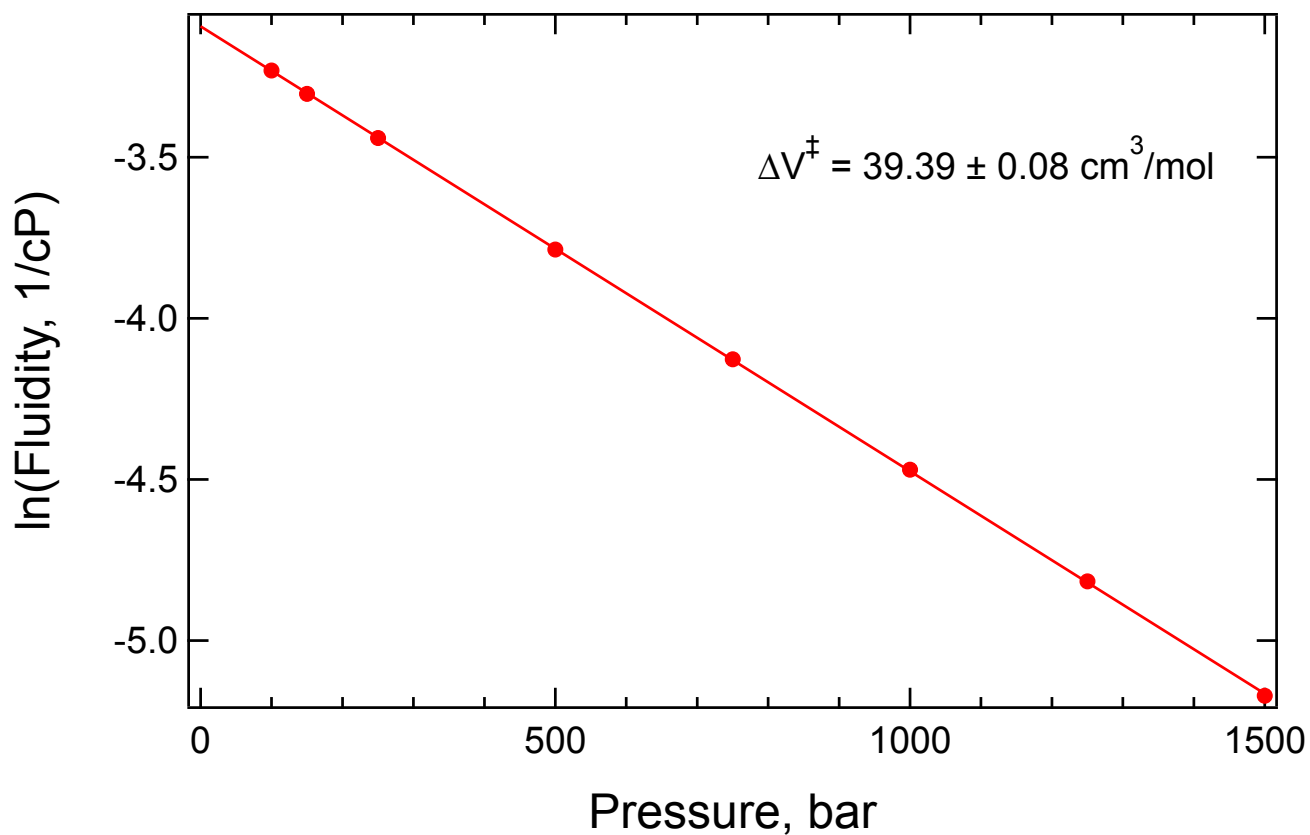

| Point | Pressure | Visc, cP | ln(Fluidity) |
|-------|----------|----------|--------------|
| 0     | 100      | 25.3     | -3.231       |
| 1     | 150      | 27.2     | -3.303       |
| 2     | 250      | 31.2     | -3.440       |
| 3     | 500      | 44.1     | -3.786       |
| 4     | 750      | 62       | -4.127       |
| 5     | 1000     | 87.3     | -4.469       |
| 6     | 1250     | 123.5    | -4.816       |
| 7     | 1500     | 176.1    | -5.171       |

# 1/Viscosity vs. Pressure Plot BMMIM TFSA at 40 °C

Data from Gacino et al. 10.1016/j.jct.2013.02.014

J. Chem. Thermodynamics 62 (2013) 162–169

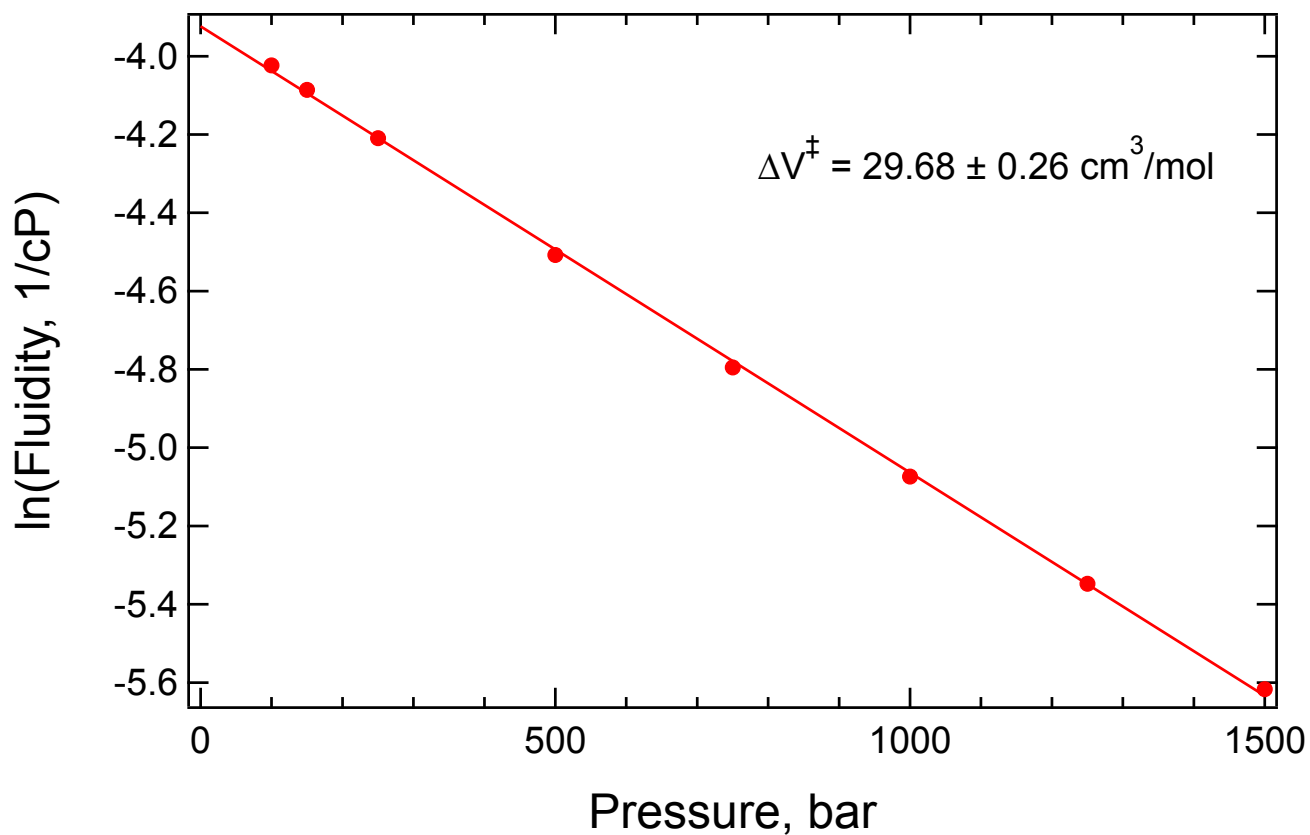

| Point | Pressure | Visc, cP | ln(Fluidity) |
|-------|----------|----------|--------------|
| 0     | 100      | 55.9     | -4.024       |
| 1     | 150      | 59.5     | -4.086       |
| 2     | 250      | 67.3     | -4.209       |
| 3     | 500      | 90.7     | -4.508       |
| 4     | 750      | 120.9    | -4.795       |
| 5     | 1000     | 159.8    | -5.074       |
| 6     | 1250     | 210.1    | -5.348       |
| 7     | 1500     | 275      | -5.617       |



# 1/Viscosity vs. Pressure Plot BMMIM TFSA at 70 °C

Data from Gacino et al. 10.1016/j.jct.2013.02.014

J. Chem. Thermodynamics 62 (2013) 162–169

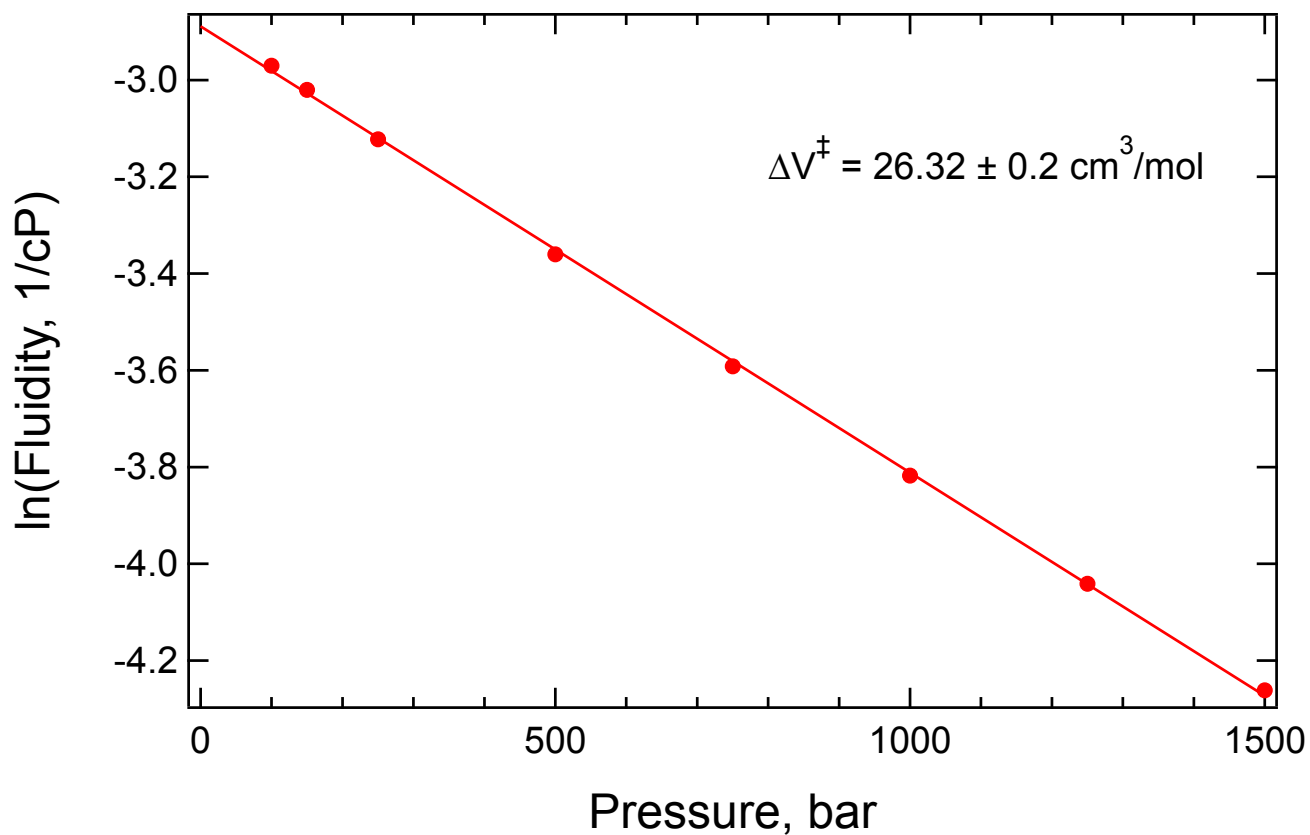

| Point | Pressure | Visc, cP | ln(Fluidity) |
|-------|----------|----------|--------------|
| 0     | 100      | 19.5     | -2.970       |
| 1     | 150      | 20.5     | -3.020       |
| 2     | 250      | 22.7     | -3.122       |
| 3     | 500      | 28.8     | -3.360       |
| 4     | 750      | 36.3     | -3.592       |
| 5     | 1000     | 45.5     | -3.818       |
| 6     | 1250     | 56.9     | -4.041       |
| 7     | 1500     | 70.9     | -4.261       |

# 1/Viscosity vs. Pressure Plot BMMIM TFSA at 90 °C

Data from Gacino et al. 10.1016/j.jct.2013.02.014

J. Chem. Thermodynamics 62 (2013) 162–169

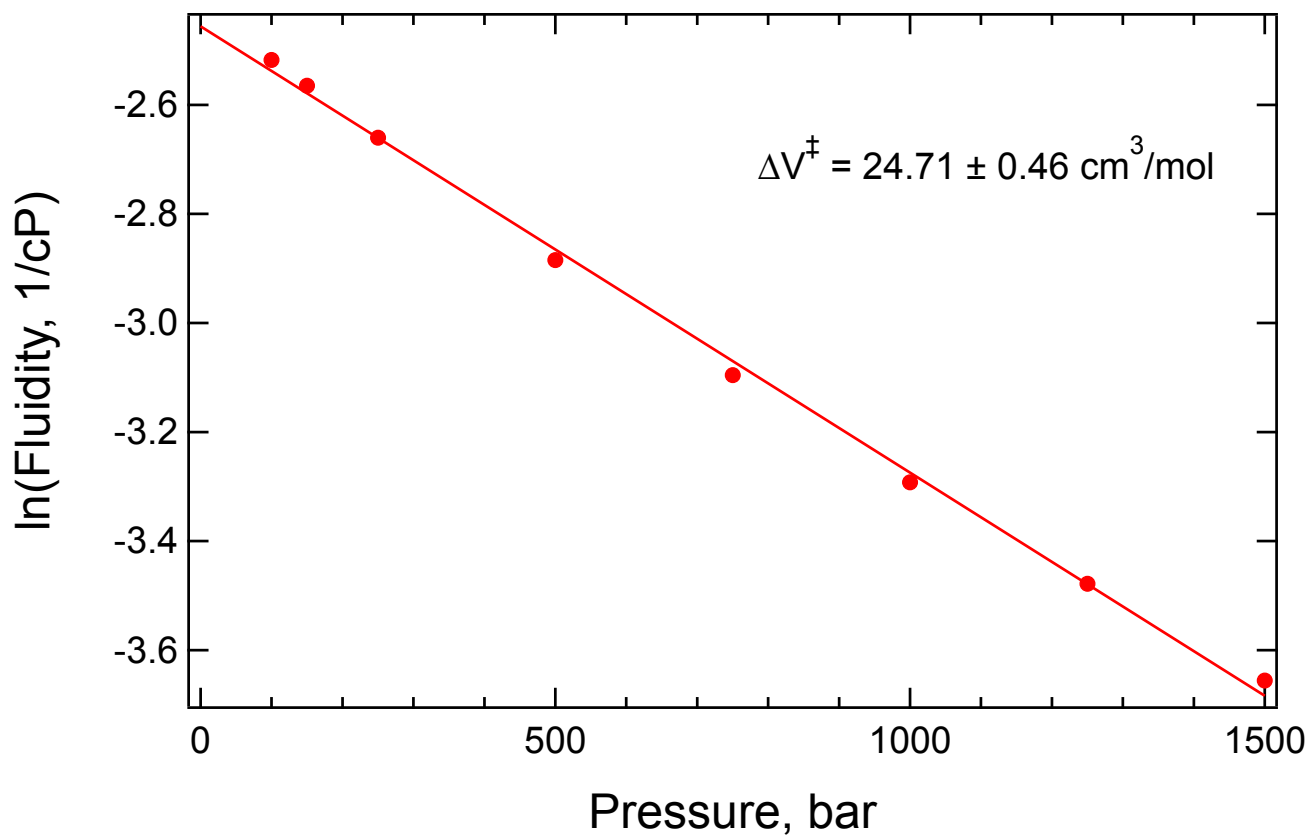

| Point | Pressure | Visc, cP | ln(Fluidity) |
|-------|----------|----------|--------------|
| 0     | 100      | 12.4     | -2.518       |
| 1     | 150      | 13       | -2.565       |
| 2     | 250      | 14.3     | -2.660       |
| 3     | 500      | 17.9     | -2.885       |
| 4     | 750      | 22.1     | -3.096       |
| 5     | 1000     | 26.9     | -3.292       |
| 6     | 1250     | 32.4     | -3.478       |
| 7     | 1500     | 38.7     | -3.656       |

1/Viscosity vs. Pressure Plot for BMpyrr TFSA at 25 °C  
 Data from Harris et al. 10.1021/je2006049

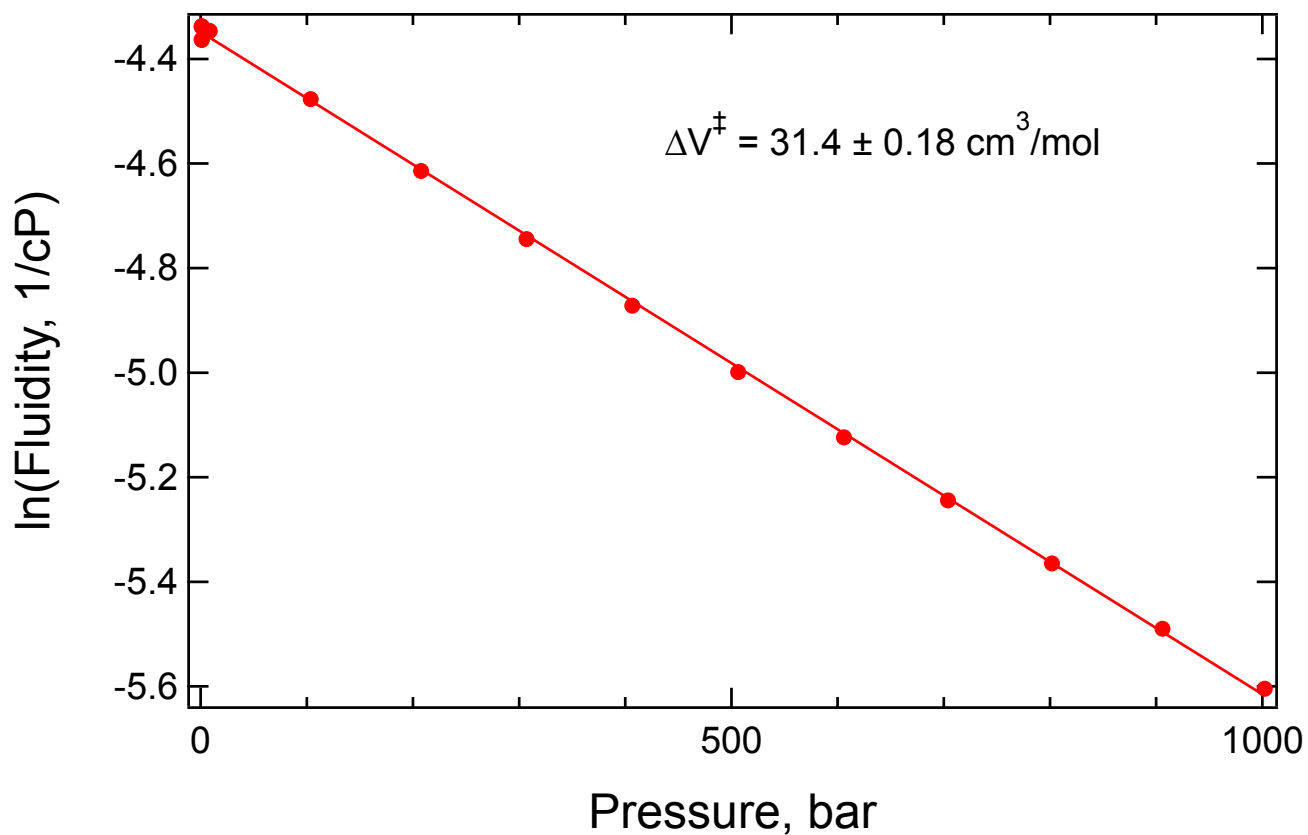

| Point | Pressure | Visc, cP | ln(Fluidity) |
|-------|----------|----------|--------------|
| 0     | 1        | 76.54    | -4.338       |
| 1     | 1        | 78.55    | -4.364       |
| 2     | 1        | 78.48    | -4.363       |
| 3     | 1        | 76.53    | -4.338       |
| 4     | 1        | 76.63    | -4.339       |
| 5     | 8.6      | 77.22    | -4.347       |
| 6     | 103.7    | 87.96    | -4.477       |
| 7     | 207.6    | 100.93   | -4.614       |
| 8     | 307      | 114.96   | -4.745       |
| 9     | 406.6    | 130.58   | -4.872       |
| 10    | 506.3    | 148.26   | -4.999       |
| 11    | 606      | 167.95   | -5.124       |
| 12    | 703.9    | 189.46   | -5.244       |
| 13    | 801.8    | 213.75   | -5.365       |
| 14    | 906      | 242.18   | -5.490       |
| 15    | 1002.3   | 271.62   | -5.604       |

1/Viscosity vs. Pressure Plot for BMpyrr TFSA at 40 °C  
 Data from Gacino et al. 10.1016/j.jct.2012.05.007

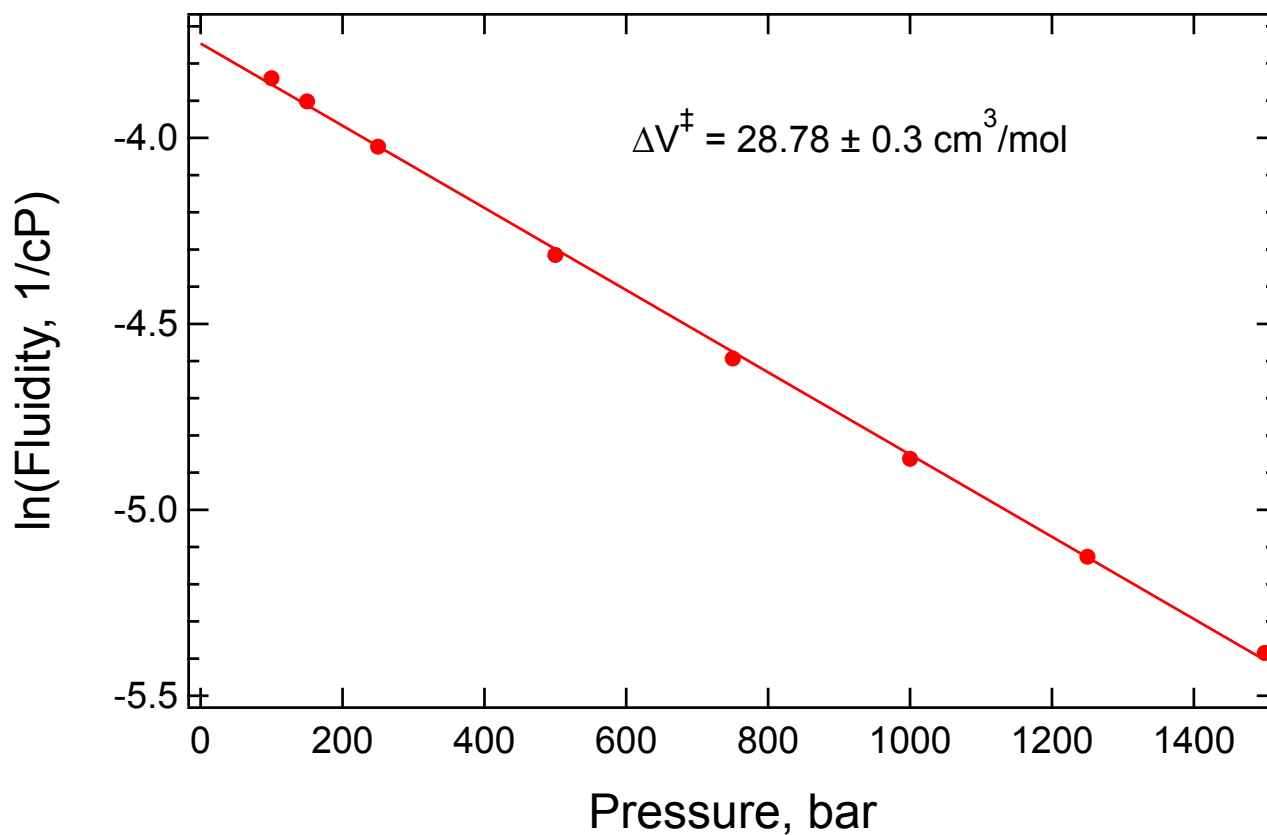

| Point | Pressure | Visc, cP | ln(Fluidity) |
|-------|----------|----------|--------------|
| 0     | 100      | 46.5     | -3.839       |
| 1     | 150      | 49.5     | -3.902       |
| 2     | 250      | 55.9     | -4.024       |
| 3     | 500      | 74.8     | -4.315       |
| 4     | 750      | 98.8     | -4.593       |
| 5     | 1000     | 129.4    | -4.863       |
| 6     | 1250     | 168.4    | -5.126       |
| 7     | 1500     | 218      | -5.384       |

1/Viscosity vs. Pressure Plot for BMpyrr TFSA at 50 °C  
 Data from Harris et al. 10.1021/je2006049

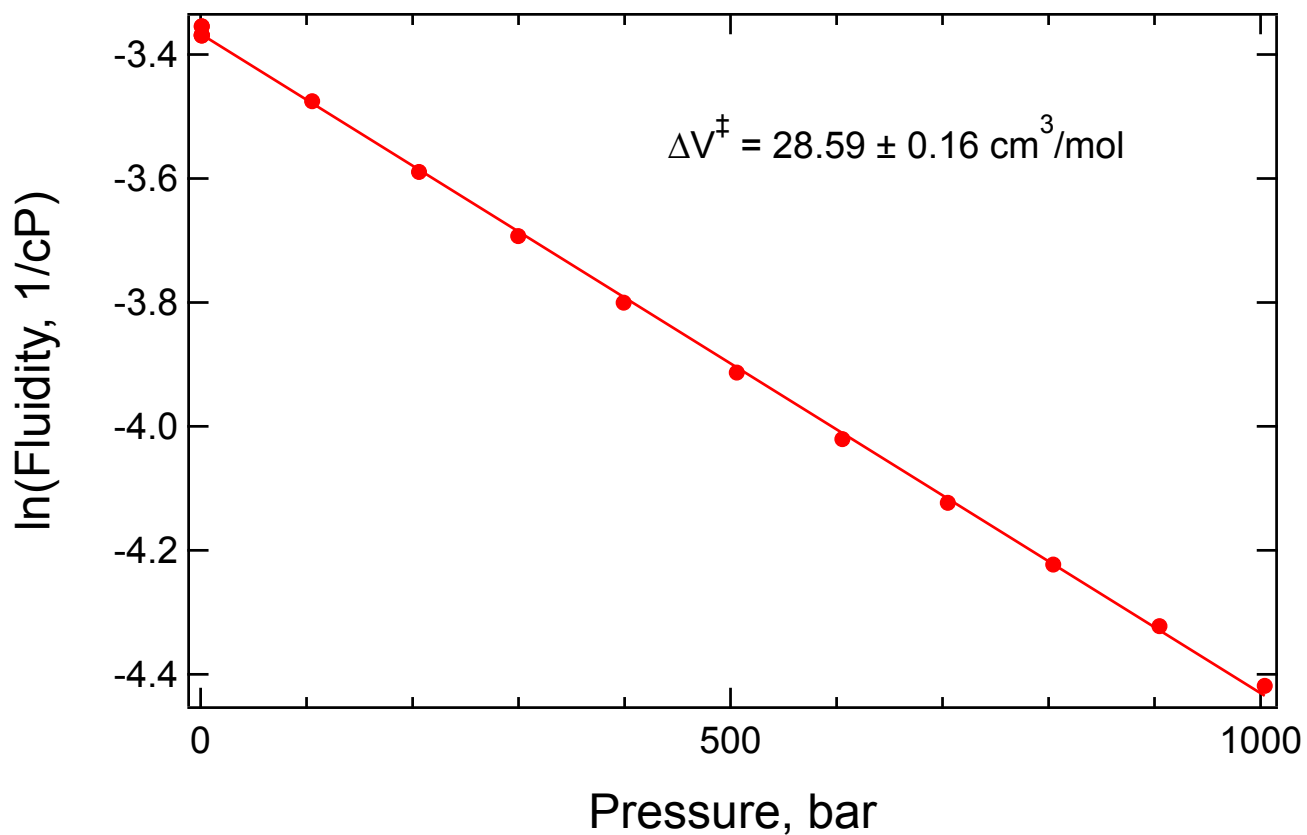

| Point | Pressure | Visc, cP | ln(Fluidity) |
|-------|----------|----------|--------------|
| 0     | 1        | 29.06    | -3.369       |
| 1     | 1        | 29.04    | -3.369       |
| 2     | 1        | 28.63    | -3.354       |
| 3     | 1        | 29.05    | -3.369       |
| 4     | 1        | 29.03    | -3.368       |
| 5     | 1        | 28.63    | -3.354       |
| 6     | 105.2    | 32.31    | -3.475       |
| 7     | 206      | 36.21    | -3.589       |
| 8     | 299.7    | 40.16    | -3.693       |
| 9     | 399.1    | 44.72    | -3.800       |
| 10    | 505.9    | 50.06    | -3.913       |
| 11    | 605.5    | 55.73    | -4.021       |
| 12    | 704.9    | 61.77    | -4.123       |
| 13    | 804.5    | 68.24    | -4.223       |
| 14    | 904.7    | 75.36    | -4.322       |
| 15    | 1004     | 82.99    | -4.419       |

# 1/Viscosity vs. Pressure Plot for BMpyrr TFSA at 70 °C

Data from Gacino et al. 10.1016/j.jct.2012.05.007

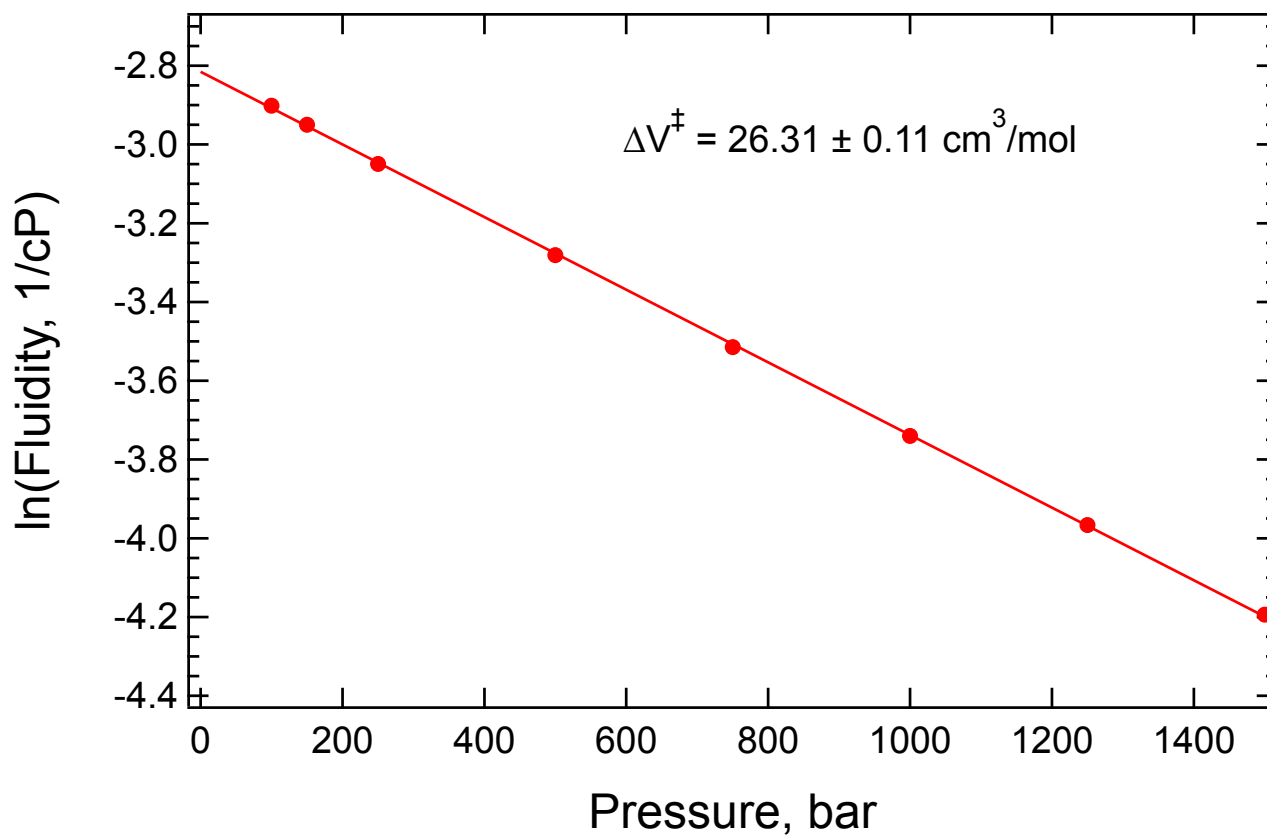

| Point | Pressure | Visc, cP | ln(Fluidity) |
|-------|----------|----------|--------------|
| 0     | 100      | 18.2     | -2.901       |
| 1     | 150      | 19.1     | -2.950       |
| 2     | 250      | 21.1     | -3.049       |
| 3     | 500      | 26.6     | -3.281       |
| 4     | 750      | 33.6     | -3.515       |
| 5     | 1000     | 42.1     | -3.740       |
| 6     | 1250     | 52.8     | -3.967       |
| 7     | 1500     | 66.3     | -4.194       |

1/Viscosity vs. Pressure Plot for BMpyrr TFSA at 75 °C  
 Data from Harris et al. 10.1021/je2006049

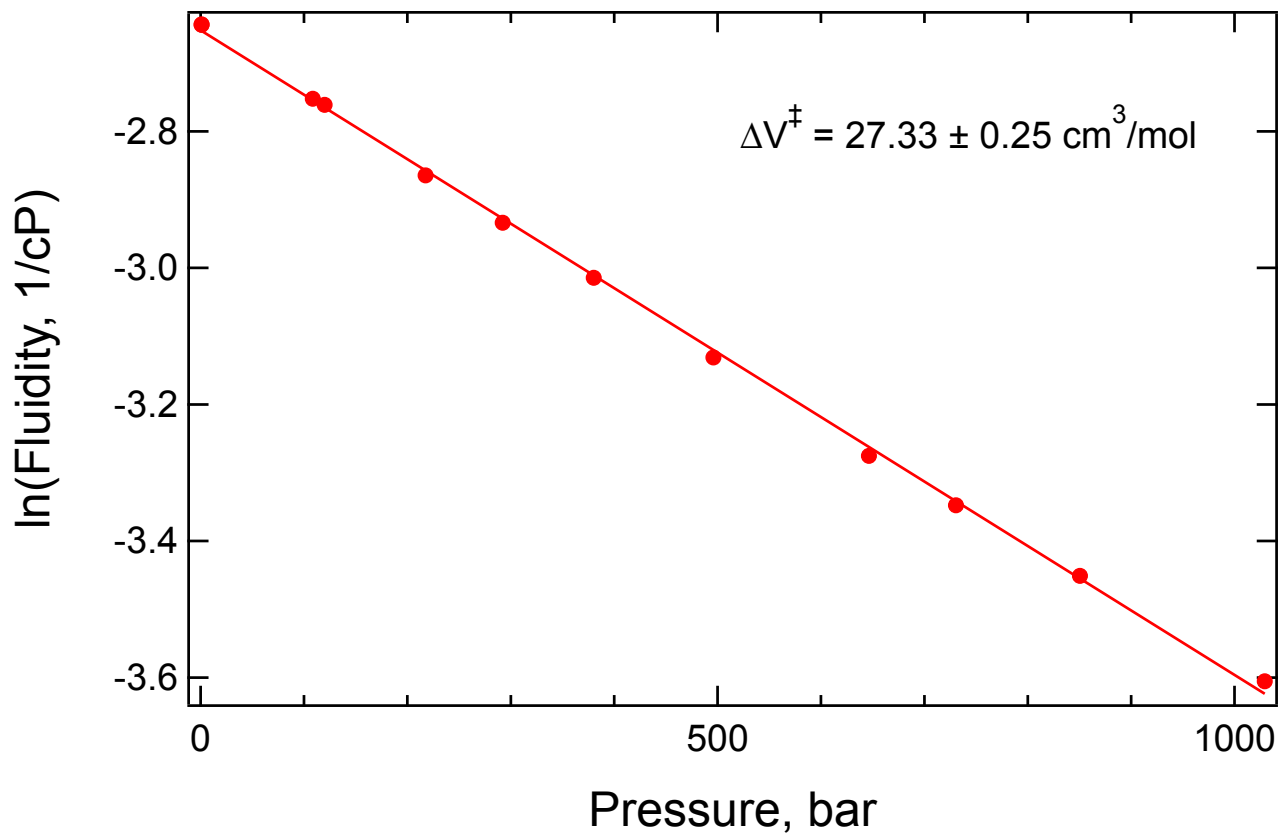

| Point | Pressure | Visc, cP | ln(Fluidity) |
|-------|----------|----------|--------------|
| 0     | 1        | 14.07    | -2.644       |
| 1     | 1        | 14.06    | -2.643       |
| 2     | 108.5    | 15.68    | -2.752       |
| 3     | 119.9    | 15.82    | -2.761       |
| 4     | 217.6    | 17.54    | -2.864       |
| 5     | 292.1    | 18.8     | -2.934       |
| 6     | 380.2    | 20.38    | -3.015       |
| 7     | 496      | 22.9     | -3.131       |
| 8     | 646.3    | 26.45    | -3.275       |
| 9     | 730.6    | 28.44    | -3.348       |
| 10    | 850.4    | 31.53    | -3.451       |
| 11    | 1029.2   | 36.8     | -3.605       |

1/Viscosity vs. Pressure Plot for BMpyrr TFSA at 90 °C  
 Data from Gacino et al. 10.1016/j.jct.2012.05.007

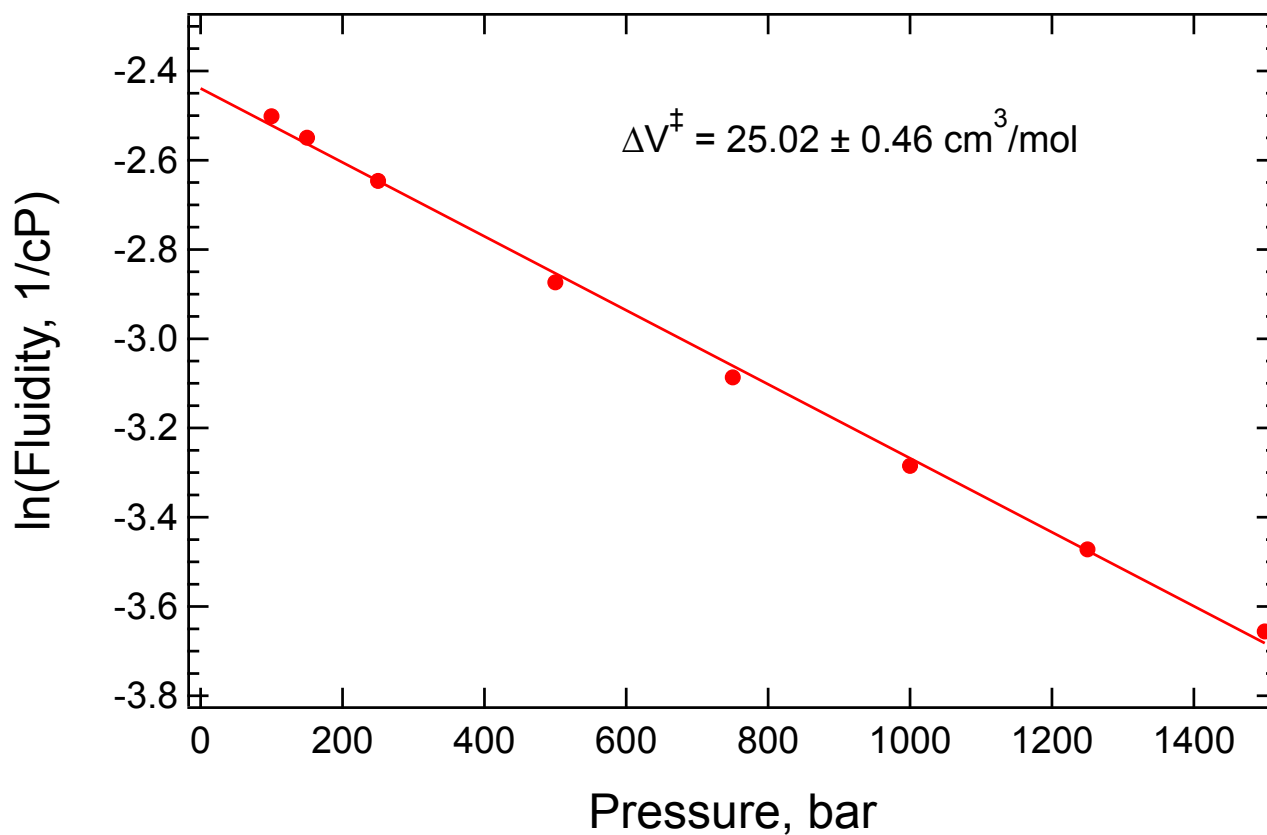

| Point | Pressure | Visc, cP | ln(Fluidity) |
|-------|----------|----------|--------------|
| 0     | 100      | 12.2     | -2.501       |
| 1     | 150      | 12.8     | -2.549       |
| 2     | 250      | 14.1     | -2.646       |
| 3     | 500      | 17.7     | -2.874       |
| 4     | 750      | 21.9     | -3.086       |
| 5     | 1000     | 26.7     | -3.285       |
| 6     | 1250     | 32.2     | -3.472       |
| 7     | 1500     | 38.7     | -3.656       |



# 1/Viscosity vs. Pressure Plot C<sub>10</sub>MIM TFSA at 25 °C

Data from Ahosseini and Scurto 10.1007/s10765-008-0497-7

Int J Thermophys (2008) 29:1222–1243

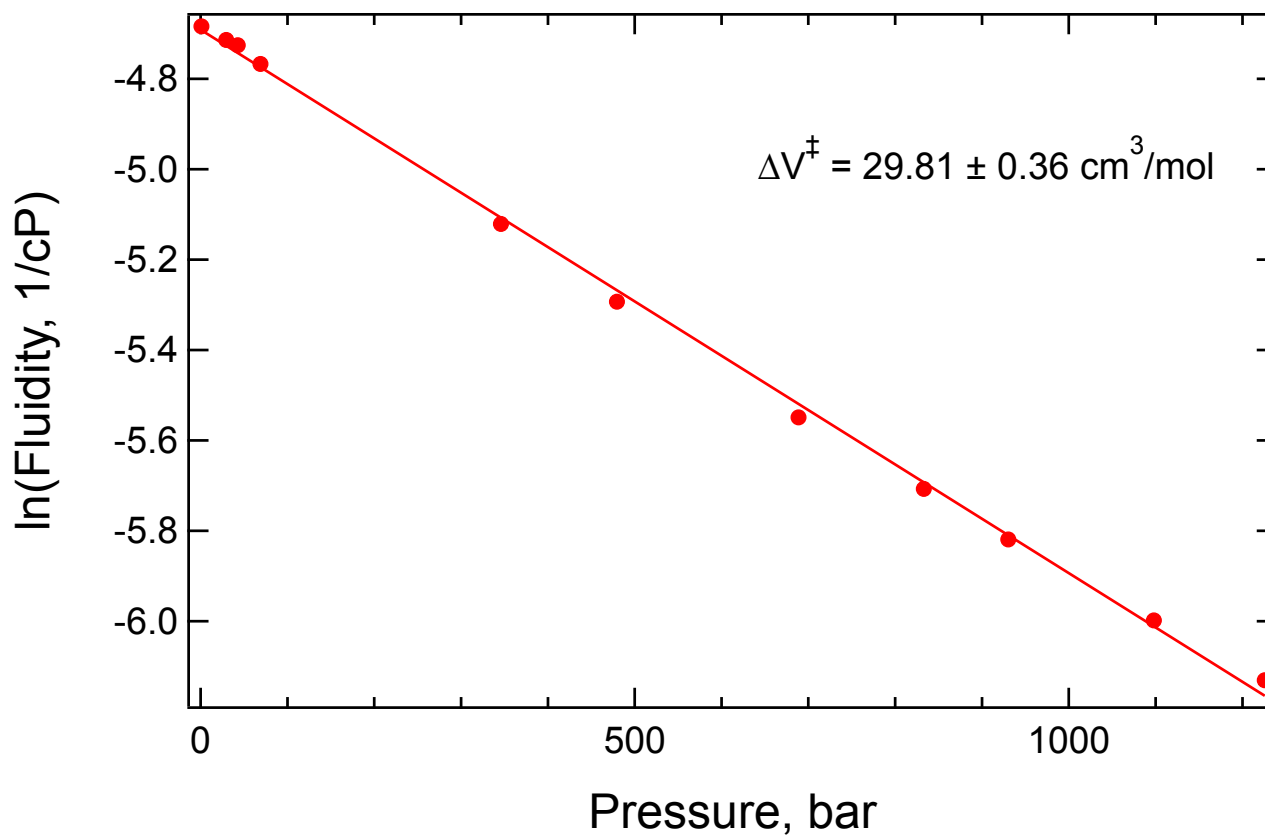

| Point | Pressure | Visc, cP | ln(Fluidity) |
|-------|----------|----------|--------------|
| 0     | 1        | 108.2    | -4.684       |
| 1     | 29.5     | 111.5    | -4.714       |
| 2     | 42.7     | 112.8    | -4.726       |
| 3     | 69       | 117.6    | -4.767       |
| 4     | 346      | 167.5    | -5.121       |
| 5     | 479.6    | 199      | -5.293       |
| 6     | 688.7    | 257      | -5.549       |
| 7     | 832.9    | 301.1    | -5.707       |
| 8     | 930.3    | 336.7    | -5.819       |
| 9     | 1098     | 402.7    | -5.998       |
| 10    | 1225.7   | 459.8    | -6.131       |

# 1/Viscosity vs. Pressure Plot C<sub>10</sub>MIM TFSA at 50 °C

Data from Ahosseini and Scurto 10.1007/s10765-008-0497-7

Int J Thermophys (2008) 29:1222–1243

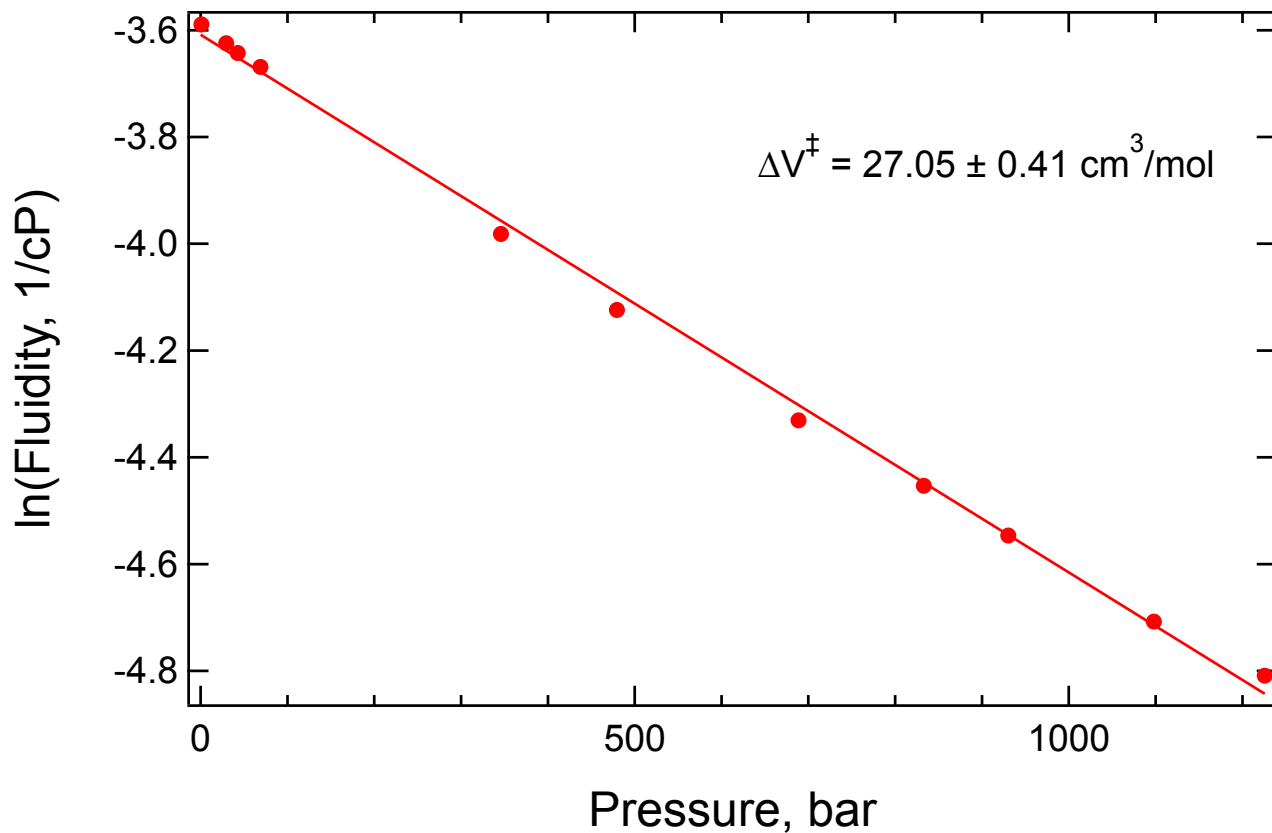

| Point | Pressure | Visc, cP | ln(Fluidity) |
|-------|----------|----------|--------------|
| 0     | 1        | 36.2     | -3.589       |
| 1     | 29.5     | 37.5     | -3.624       |
| 2     | 42.7     | 38.2     | -3.643       |
| 3     | 69       | 39.2     | -3.669       |
| 4     | 346      | 53.6     | -3.982       |
| 5     | 479.6    | 61.8     | -4.124       |
| 6     | 688.7    | 76       | -4.331       |
| 7     | 832.9    | 85.9     | -4.453       |
| 8     | 930.3    | 94.3     | -4.546       |
| 9     | 1098     | 110.8    | -4.708       |
| 10    | 1225.7   | 122.6    | -4.809       |

# 1/Viscosity vs. Pressure Plot C<sub>10</sub>MIM TFSA at 70 °C

Data from Ahosseini and Scurto 10.1007/s10765-008-0497-7

Int J Thermophys (2008) 29:1222–1243

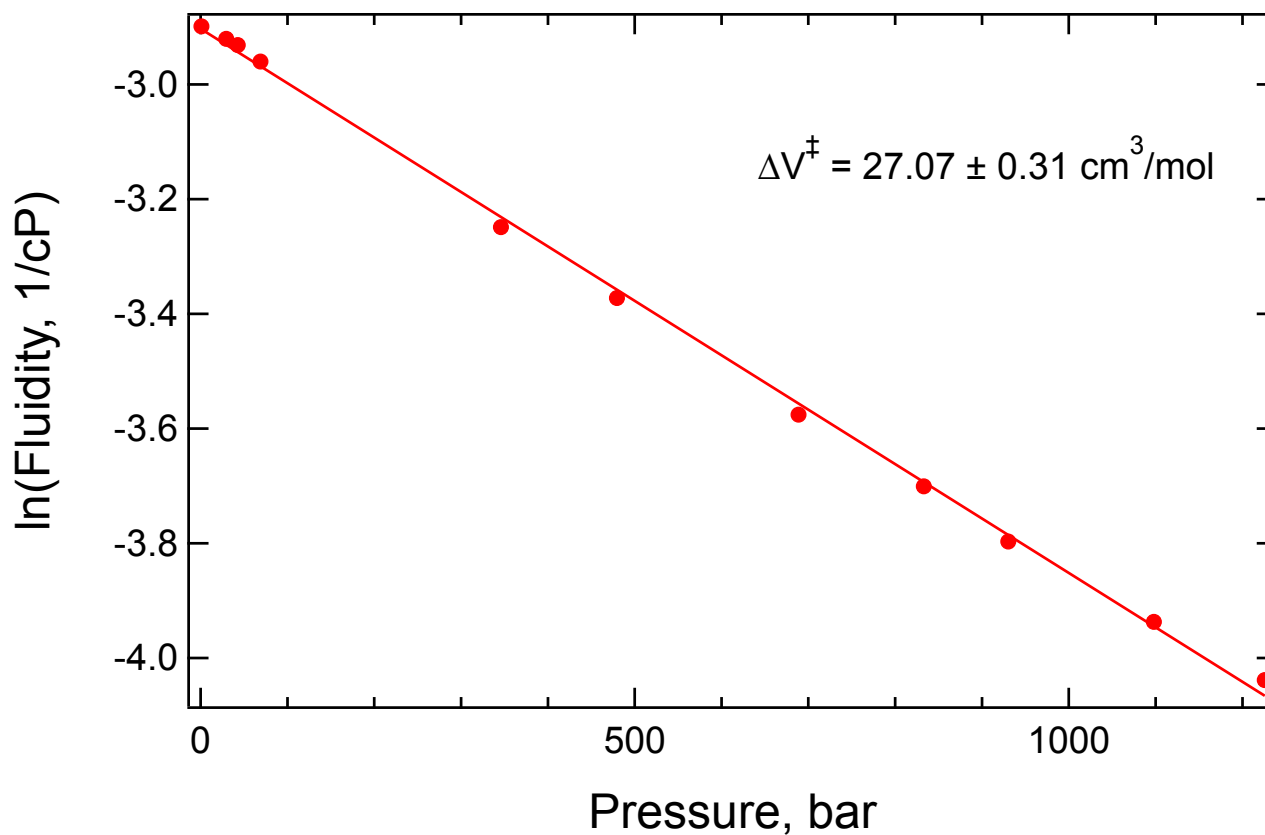

| Point | Pressure | Visc, cP | ln(Fluidity) |
|-------|----------|----------|--------------|
| 0     | 1        | 18.15    | -2.899       |
| 1     | 29.5     | 18.55    | -2.920       |
| 2     | 42.7     | 18.75    | -2.931       |
| 3     | 69       | 19.3     | -2.960       |
| 4     | 346      | 25.76    | -3.249       |
| 5     | 479.6    | 29.15    | -3.372       |
| 6     | 688.7    | 35.72    | -3.576       |
| 7     | 832.9    | 40.47    | -3.701       |
| 8     | 930.3    | 44.56    | -3.797       |
| 9     | 1098     | 51.26    | -3.937       |
| 10    | 1225.7   | 56.74    | -4.038       |

# 1/Viscosity vs. Pressure Plot for EMIM BF<sub>4</sub> at 20 °C

Data from Sanmamed et al. 10.1016/j.jct.2009.11.014

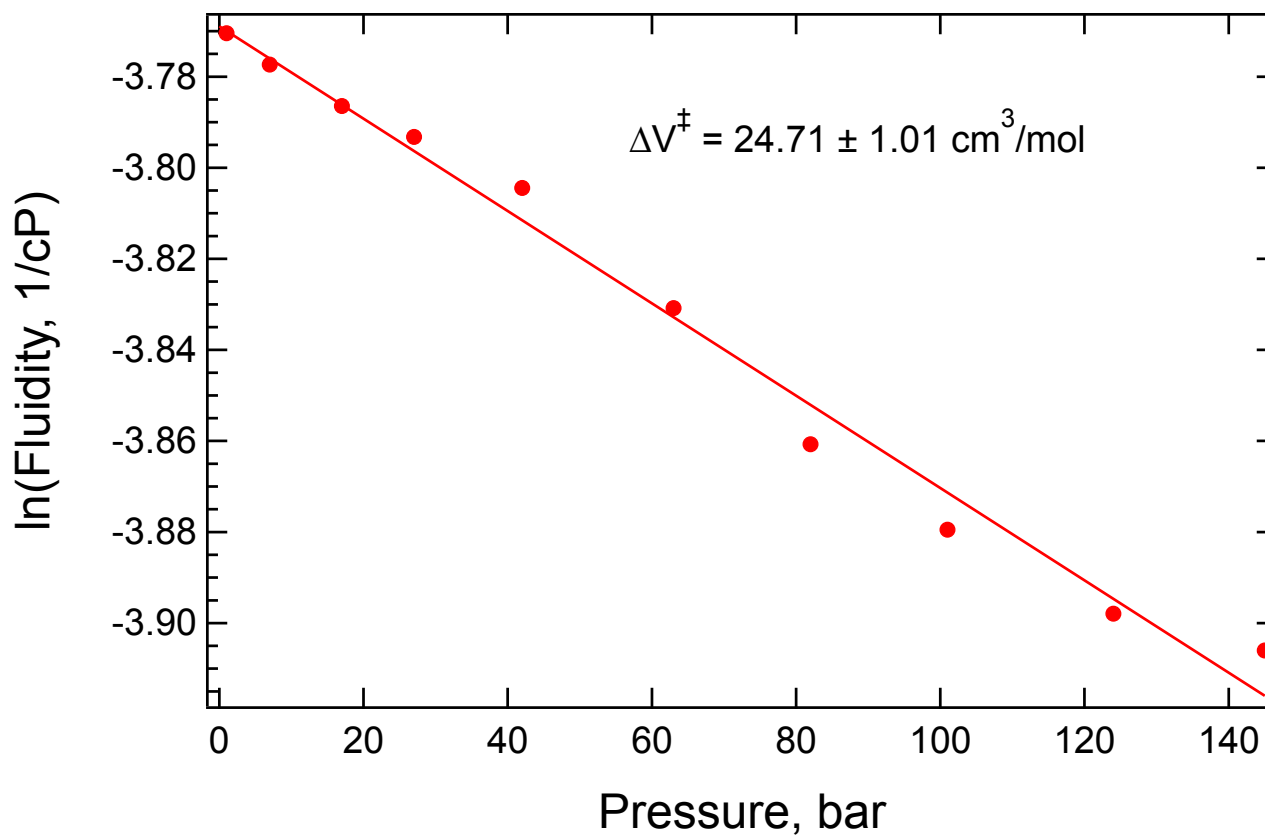

| Point | Pressure | Visc, cP | ln(Fluidity) |
|-------|----------|----------|--------------|
| 0     | 1        | 43.4     | -3.770       |
| 1     | 7        | 43.7     | -3.777       |
| 2     | 17       | 44.1     | -3.786       |
| 3     | 27       | 44.4     | -3.793       |
| 4     | 42       | 44.9     | -3.804       |
| 5     | 63       | 46.1     | -3.831       |
| 6     | 82       | 47.5     | -3.861       |
| 7     | 101      | 48.4     | -3.879       |
| 8     | 124      | 49.3     | -3.898       |
| 9     | 145      | 49.7     | -3.906       |

# 1/Viscosity vs. Pressure Plot for EMIM BF<sub>4</sub> at 30 °C

Data from Sanmamed et al. 10.1016/j.jct.2009.11.014

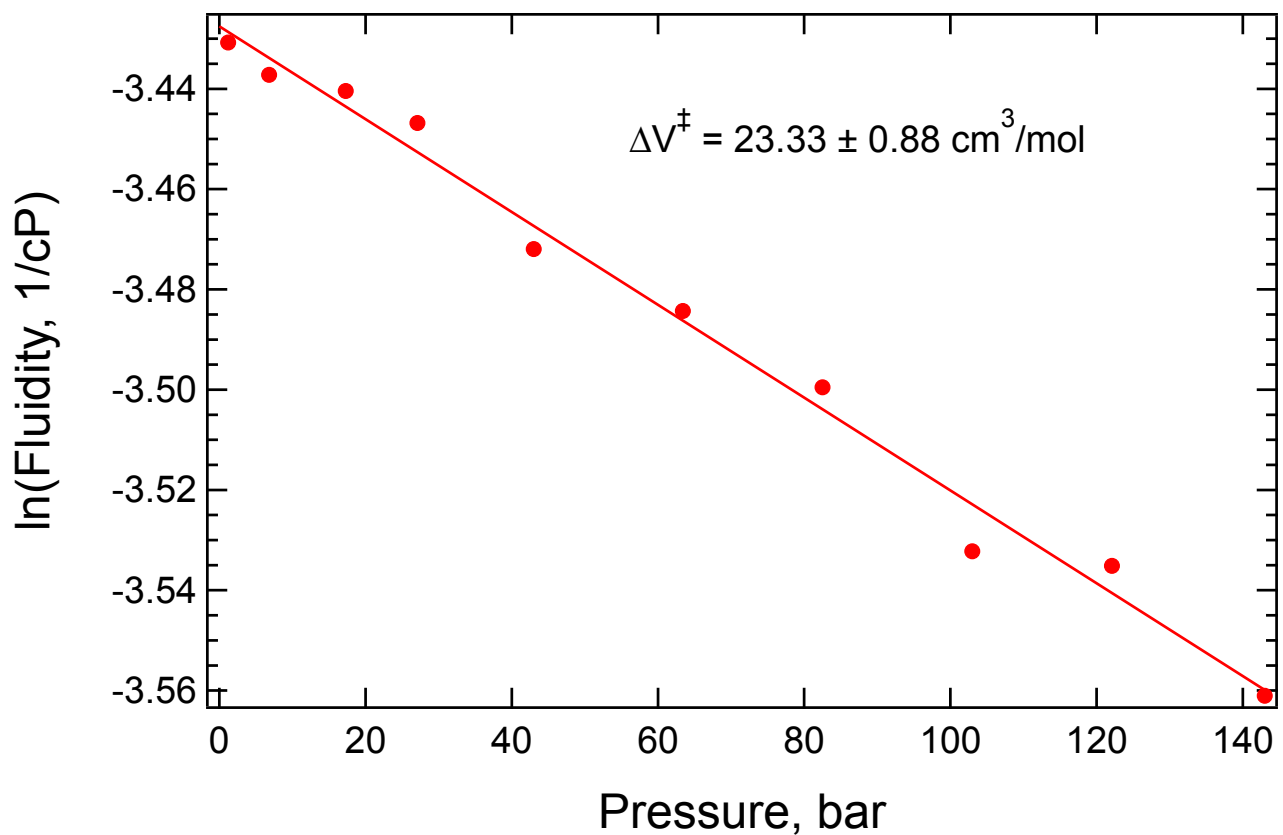

| Point | Pressure | Visc, cP | ln(Fluidity) |
|-------|----------|----------|--------------|
| 0     | 1.2      | 30.9     | -3.431       |
| 1     | 6.8      | 31.1     | -3.437       |
| 2     | 17.3     | 31.2     | -3.440       |
| 3     | 27.1     | 31.4     | -3.447       |
| 4     | 43       | 32.2     | -3.472       |
| 5     | 63.4     | 32.6     | -3.484       |
| 6     | 82.5     | 33.1     | -3.500       |
| 7     | 103      | 34.2     | -3.532       |
| 8     | 122.1    | 34.3     | -3.535       |
| 9     | 143      | 35.2     | -3.561       |

# 1/Viscosity vs. Pressure Plot for EMIM EtSO<sub>4</sub> at 40 °C

Data from Gacino et al. 10.1016/j.jct.2012.05.007

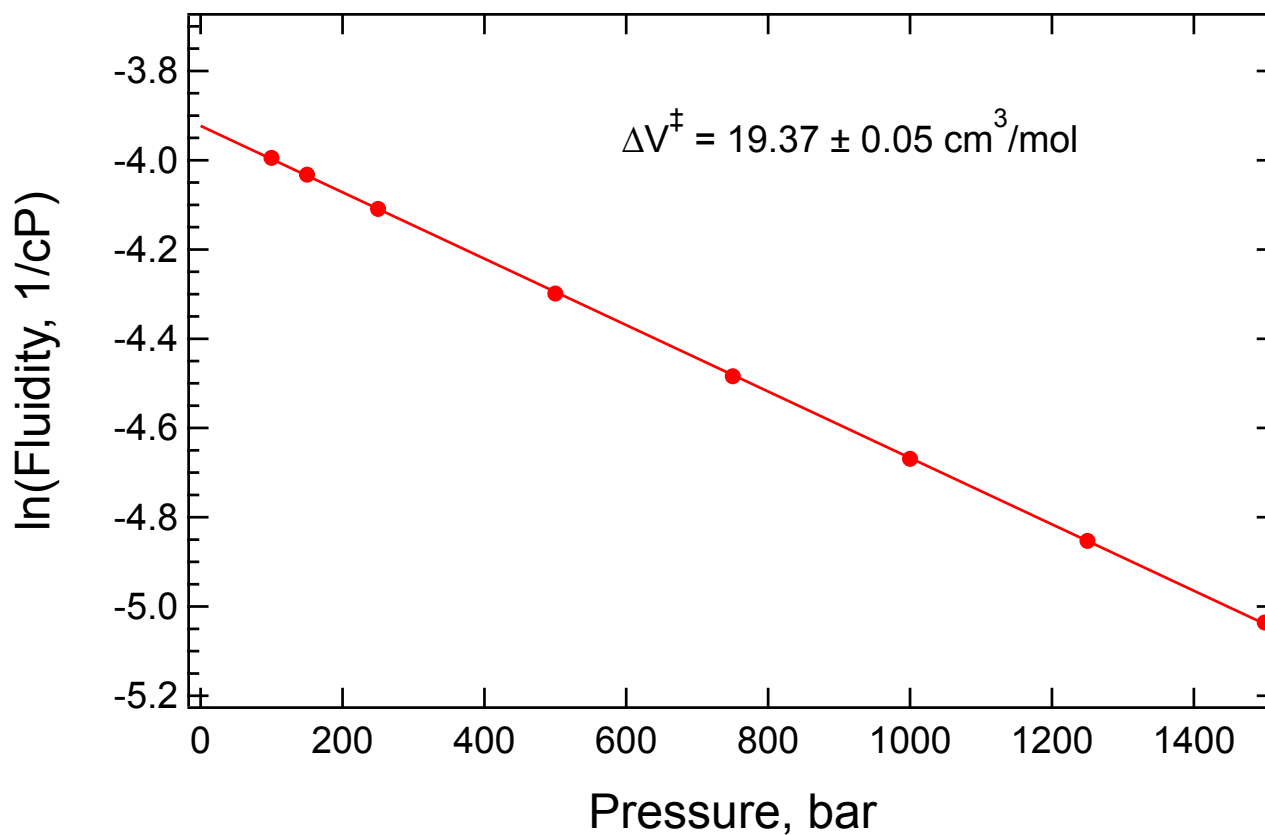

| Point | Pressure | Visc, cP | ln(Fluidity) |
|-------|----------|----------|--------------|
| 0     | 100      | 54.3     | -3.995       |
| 1     | 150      | 56.4     | -4.032       |
| 2     | 250      | 60.9     | -4.109       |
| 3     | 500      | 73.6     | -4.299       |
| 4     | 750      | 88.6     | -4.484       |
| 5     | 1000     | 106.6    | -4.669       |
| 6     | 1250     | 128.1    | -4.853       |
| 7     | 1500     | 153.8    | -5.036       |

1/Viscosity vs. Pressure Plot EMIM TFSA at 25 °C  
 Data from Ahosseini and Scurto 10.1007/s10765-008-0497-7

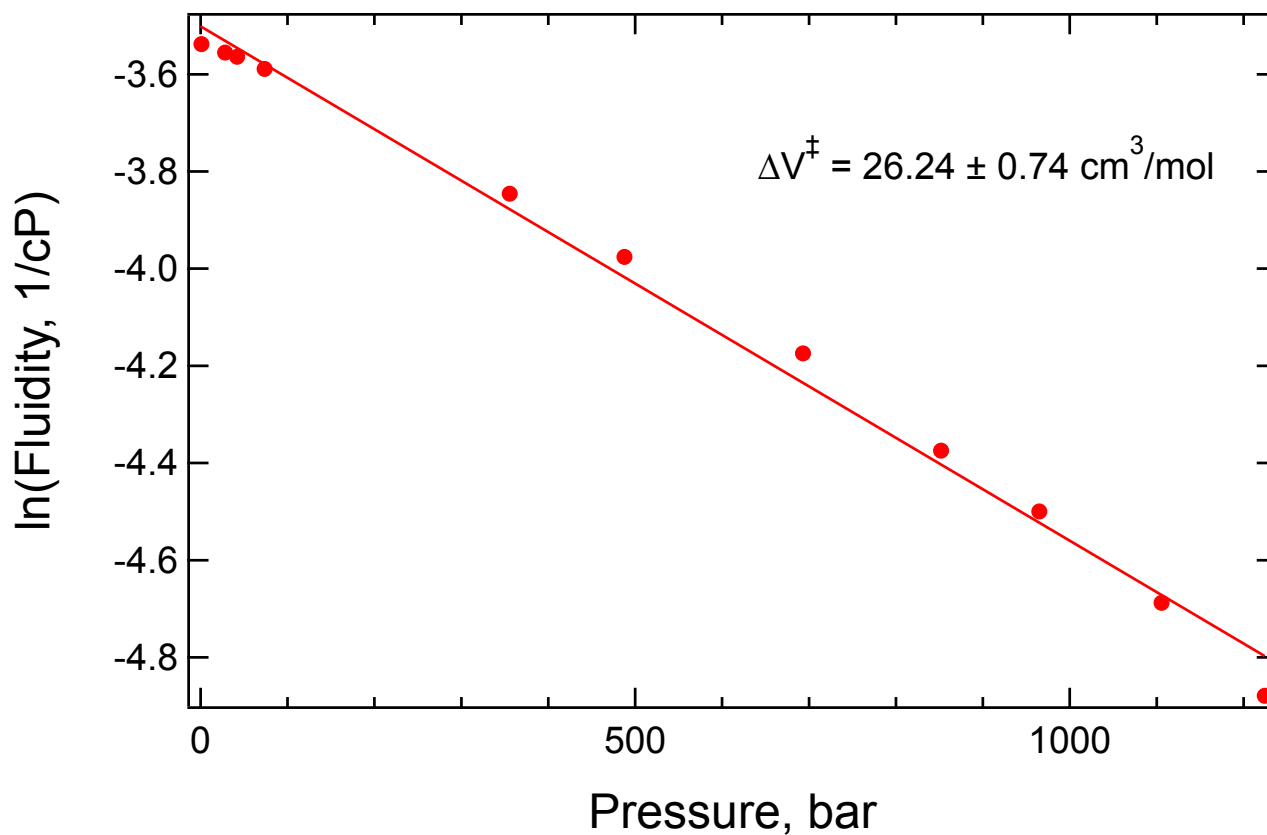

| Point | Pressure | Visc, cP | ln(Fluidity) |
|-------|----------|----------|--------------|
| 0     | 1        | 34.4     | -3.538       |
| 1     | 28.2     | 35       | -3.555       |
| 2     | 41.9     | 35.3     | -3.564       |
| 3     | 73.6     | 36.2     | -3.589       |
| 4     | 355.6    | 46.8     | -3.846       |
| 5     | 487.6    | 53.3     | -3.976       |
| 6     | 693      | 65       | -4.174       |
| 7     | 852      | 79.4     | -4.374       |
| 8     | 965      | 90       | -4.500       |
| 9     | 1105.5   | 108.6    | -4.688       |
| 10    | 1224.3   | 131.5    | -4.879       |

1/Viscosity vs. Pressure Plot EMIM TFSA at 50 °C  
 Data from Ahosseini and Scurto 10.1007/s10765-008-0497-7

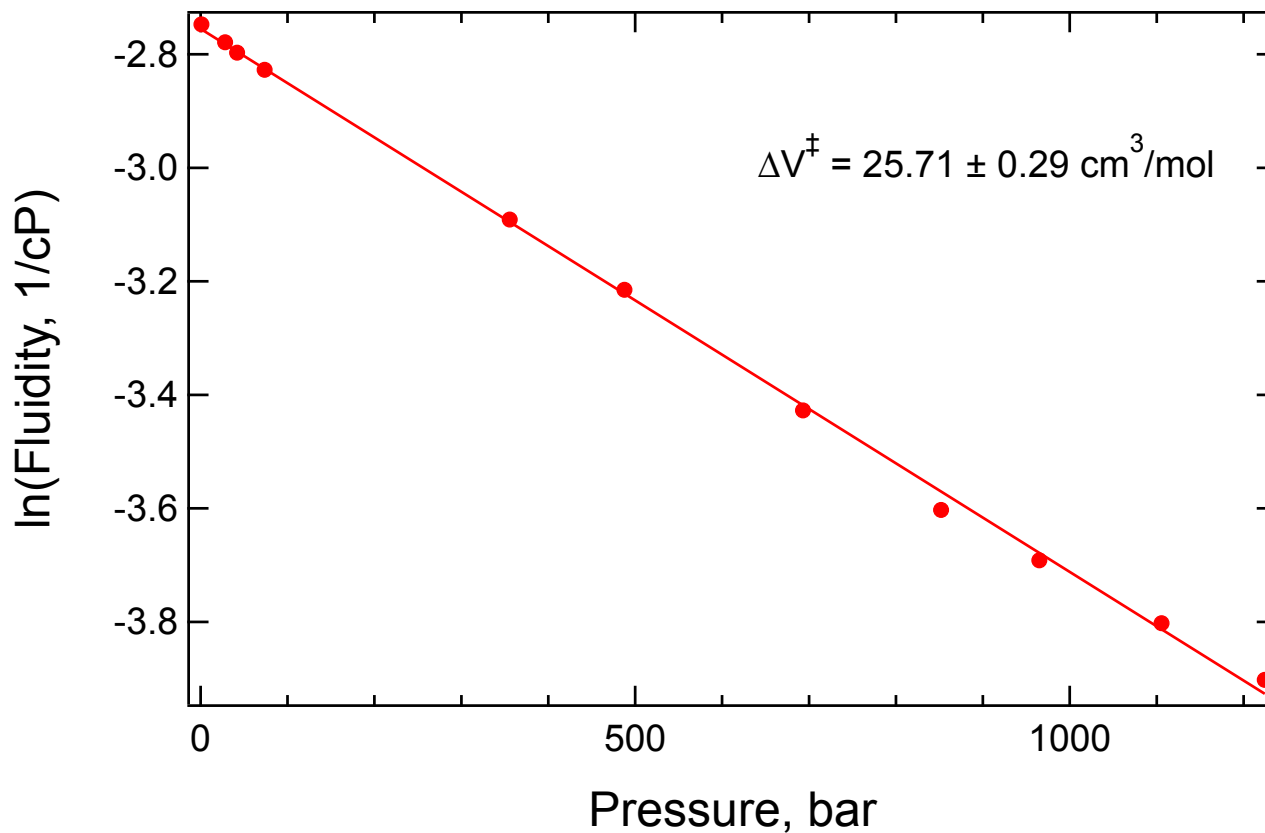

| Point | Pressure | Visc, cP | ln(Fluidity) |
|-------|----------|----------|--------------|
| 0     | 1        | 15.6     | -2.747       |
| 1     | 28.2     | 16.1     | -2.779       |
| 2     | 41.9     | 16.4     | -2.797       |
| 3     | 73.6     | 16.9     | -2.827       |
| 4     | 355.6    | 22       | -3.091       |
| 5     | 487.6    | 24.9     | -3.215       |
| 6     | 693      | 30.8     | -3.428       |
| 7     | 852      | 36.7     | -3.603       |
| 8     | 965      | 40.1     | -3.691       |
| 9     | 1105.5   | 44.8     | -3.802       |
| 10    | 1224.3   | 49.5     | -3.902       |



1/Viscosity vs. Pressure Plot EMIM TFSA at 70 °C  
 Data from Ahosseini and Scurto 10.1007/s10765-008-0497-7

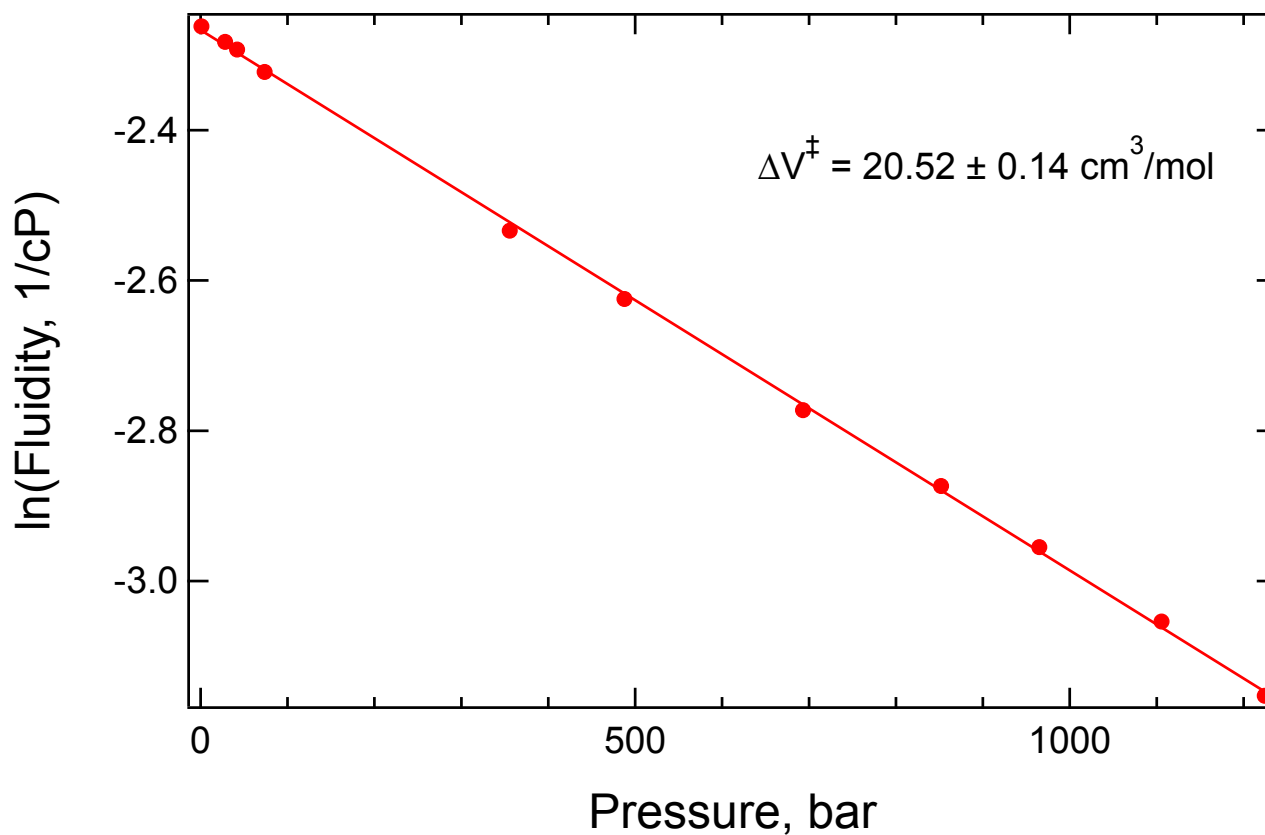

| Point | Pressure | Visc, cP | ln(Fluidity) |
|-------|----------|----------|--------------|
| 0     | 1        | 9.6      | -2.262       |
| 1     | 28.2     | 9.8      | -2.282       |
| 2     | 41.9     | 9.9      | -2.293       |
| 3     | 73.6     | 10.2     | -2.322       |
| 4     | 355.6    | 12.6     | -2.534       |
| 5     | 487.6    | 13.8     | -2.625       |
| 6     | 693      | 16       | -2.773       |
| 7     | 852      | 17.7     | -2.874       |
| 8     | 965      | 19.2     | -2.955       |
| 9     | 1105.5   | 21.2     | -3.054       |
| 10    | 1224.3   | 23.4     | -3.153       |

# 1/Viscosity vs. Pressure Plot (EOM)Mpyrr FAP at 40 °C

Data from Gacino et al. 10.1016/j.jct.2013.02.014

J. Chem. Thermodynamics 62 (2013) 162–169

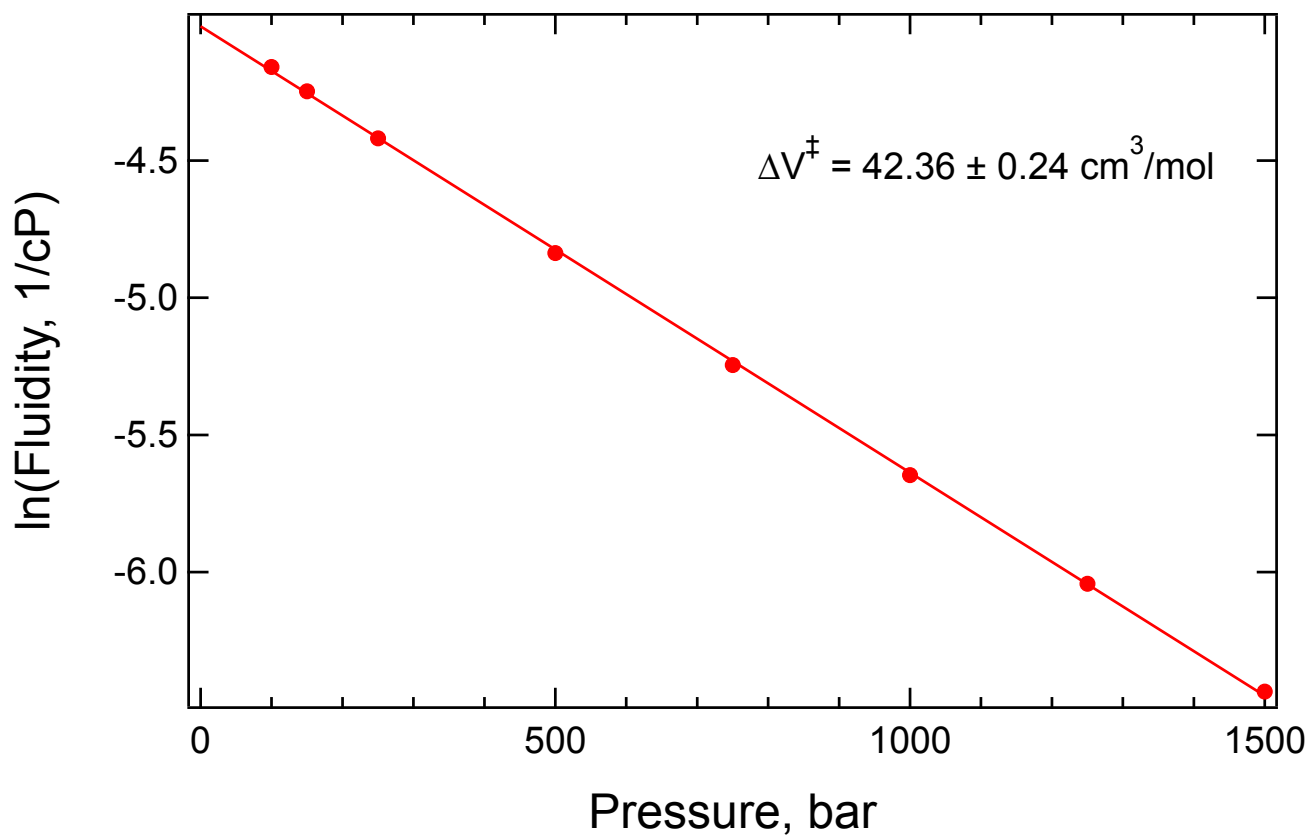

| Point | Pressure | Visc, cP | ln(Fluidity) |
|-------|----------|----------|--------------|
| 0     | 100      | 64       | -4.159       |
| 1     | 150      | 69.9     | -4.247       |
| 2     | 250      | 83       | -4.419       |
| 3     | 500      | 126.1    | -4.837       |
| 4     | 750      | 189.7    | -5.245       |
| 5     | 1000     | 283.3    | -5.647       |
| 6     | 1250     | 421.1    | -6.043       |
| 7     | 1500     | 623.8    | -6.436       |

# 1/Viscosity vs. Pressure Plot (EOM)Mpyrr FAP at 70 °C

Data from Gacino et al. 10.1016/j.jct.2013.02.014

J. Chem. Thermodynamics 62 (2013) 162–169

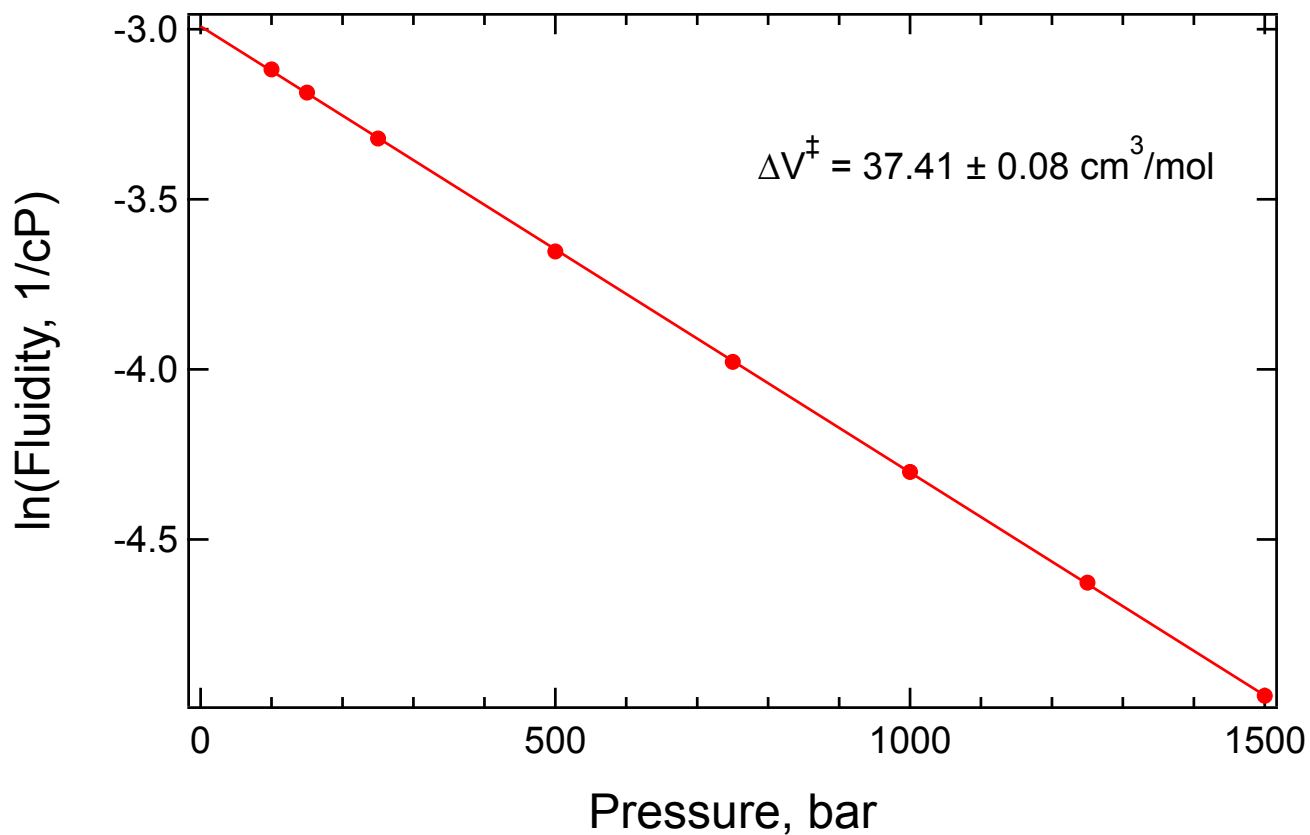

| Point | Pressure | Visc, cP | ln(Fluidity) |
|-------|----------|----------|--------------|
| 0     | 100      | 22.6     | -3.118       |
| 1     | 150      | 24.2     | -3.186       |
| 2     | 250      | 27.7     | -3.321       |
| 3     | 500      | 38.6     | -3.653       |
| 4     | 750      | 53.4     | -3.978       |
| 5     | 1000     | 73.8     | -4.301       |
| 6     | 1250     | 102.2    | -4.627       |
| 7     | 1500     | 142.5    | -4.959       |

# 1/Viscosity vs. Pressure Plot (EOM)Mpyrr FAP at 90 °C

Data from Gacino et al. 10.1016/j.jct.2013.02.014

J. Chem. Thermodynamics 62 (2013) 162–169

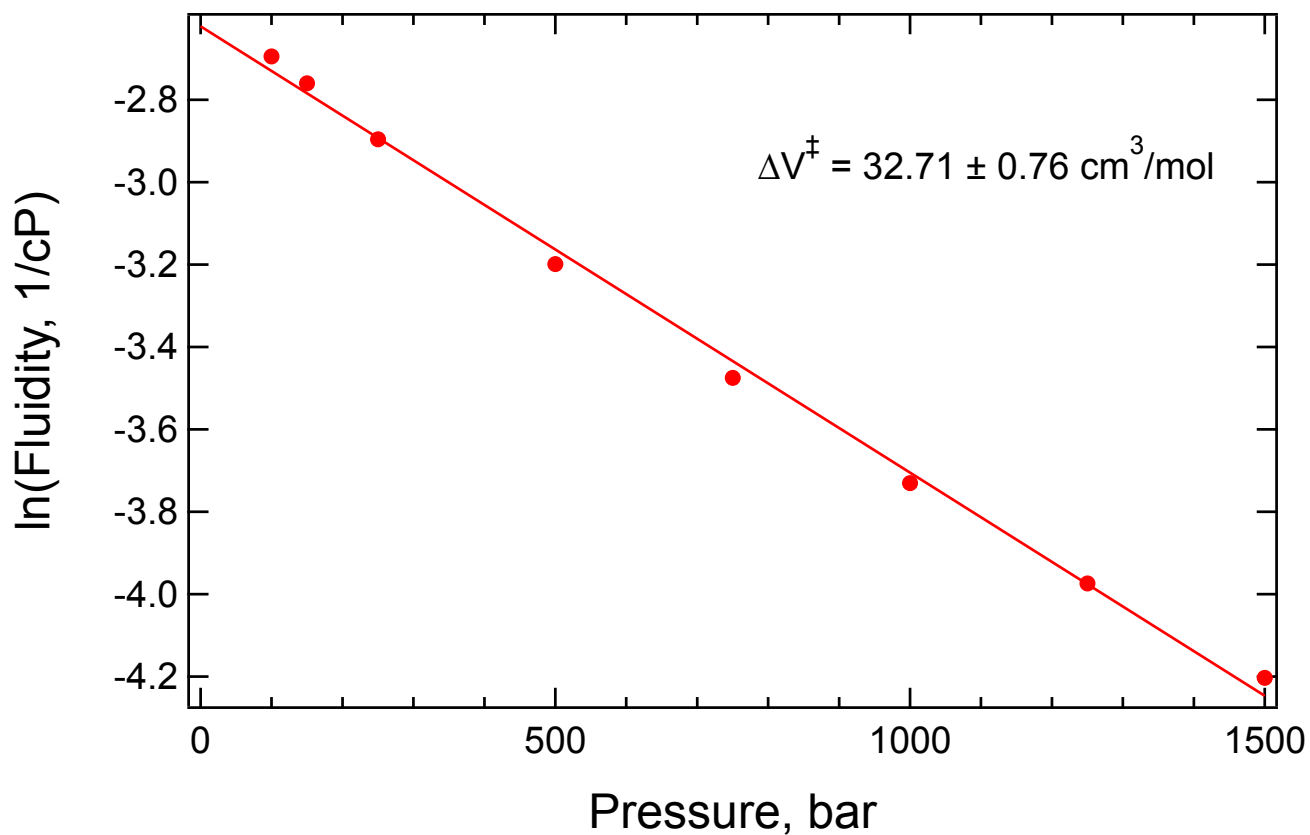

| Point | Pressure | Visc, cP | ln(Fluidity) |
|-------|----------|----------|--------------|
| 0     | 100      | 14.8     | -2.695       |
| 1     | 150      | 15.8     | -2.760       |
| 2     | 250      | 18.1     | -2.896       |
| 3     | 500      | 24.5     | -3.199       |
| 4     | 750      | 32.3     | -3.475       |
| 5     | 1000     | 41.7     | -3.731       |
| 6     | 1250     | 53.2     | -3.974       |
| 7     | 1500     | 66.9     | -4.203       |

1/Viscosity vs. Pressure Plot for (EOM)Mpyrr TFSA at 40 °C  
 Data from Gacino et al. 10.1016/j.jct.2012.05.007

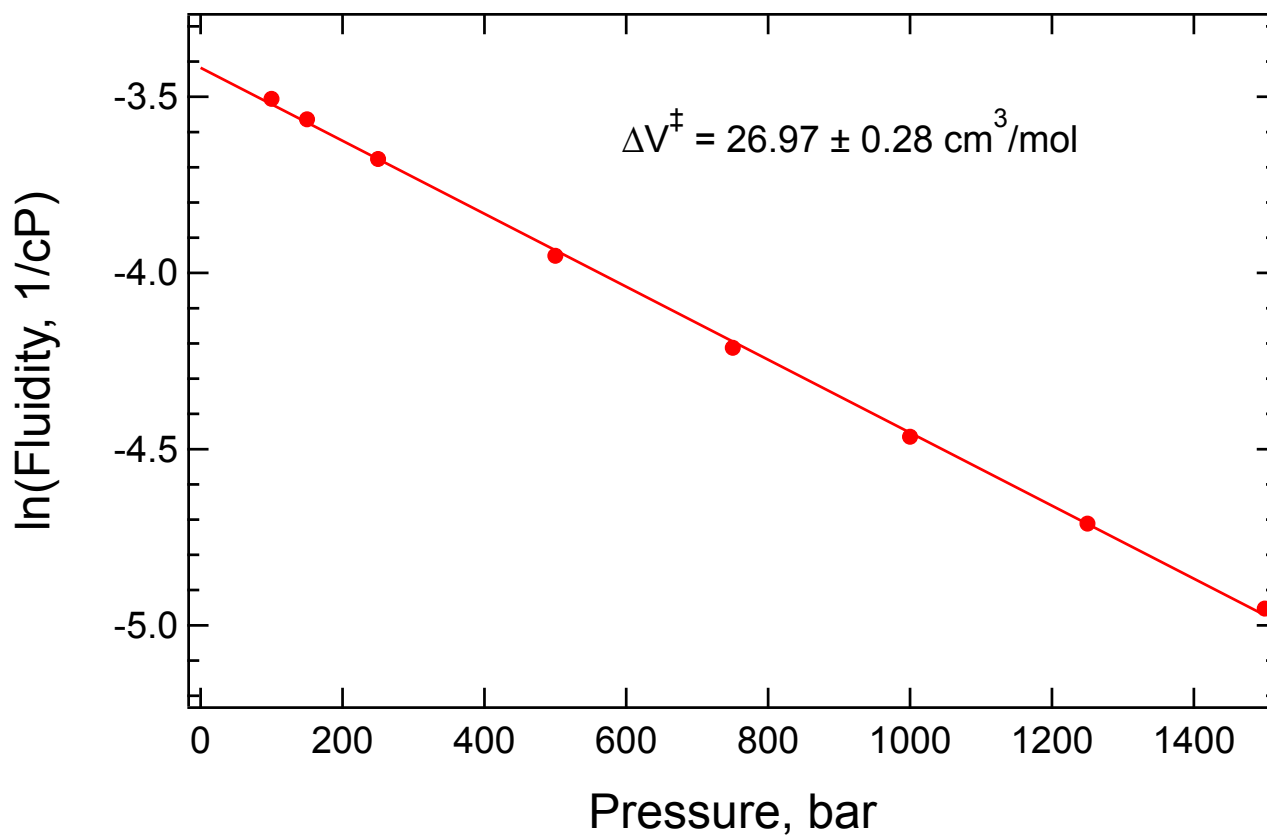

| Point | Pressure | Visc, cP | ln(Fluidity) |
|-------|----------|----------|--------------|
| 0     | 100      | 33.3     | -3.506       |
| 1     | 150      | 35.3     | -3.564       |
| 2     | 250      | 39.5     | -3.676       |
| 3     | 500      | 52       | -3.951       |
| 4     | 750      | 67.5     | -4.212       |
| 5     | 1000     | 86.9     | -4.465       |
| 6     | 1250     | 111.2    | -4.711       |
| 7     | 1500     | 141.5    | -4.952       |

1/Viscosity vs. Pressure Plot for (EOM)Mpyrr TFSA at 70 °C  
 Data from Gacino et al. 10.1016/j.jct.2012.05.007

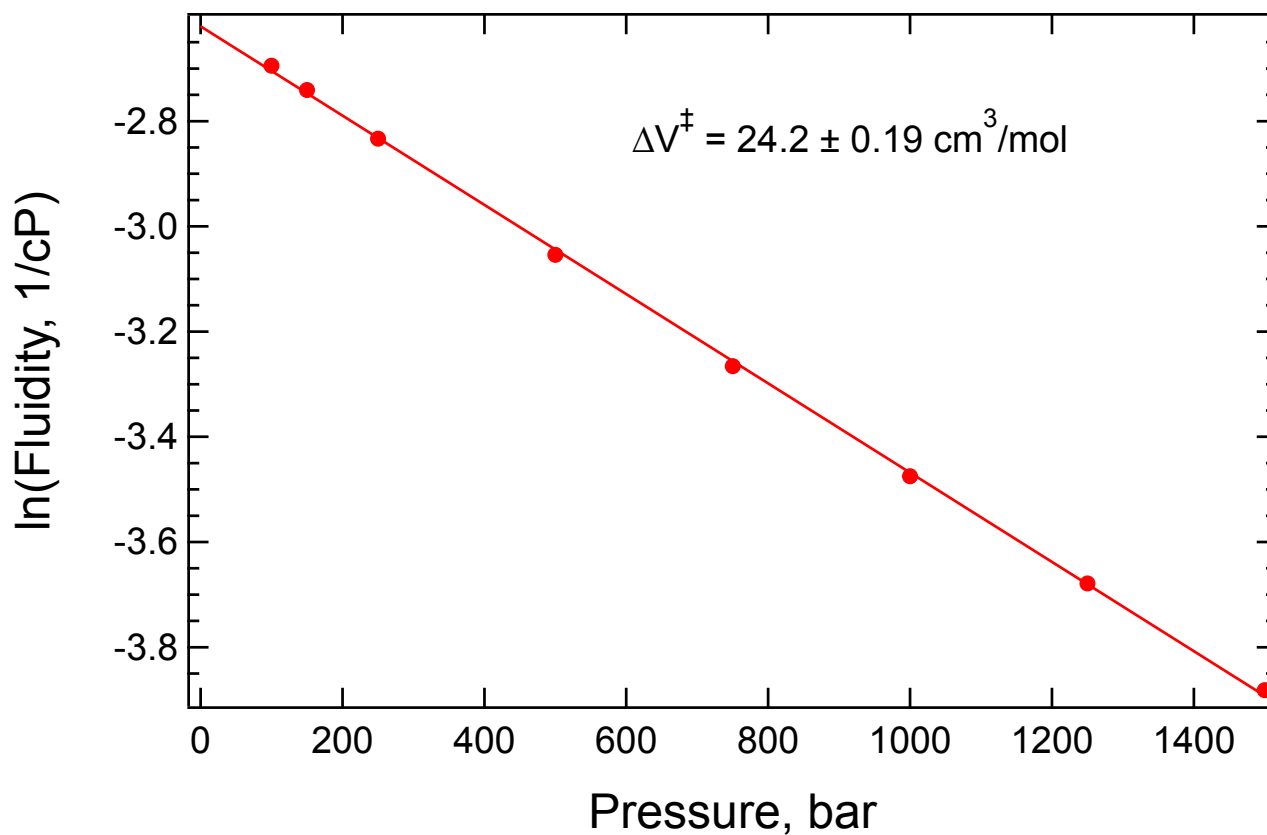

| Point | Pressure | Visc, cP | ln(Fluidity) |
|-------|----------|----------|--------------|
| 0     | 100      | 14.8     | -2.695       |
| 1     | 150      | 15.5     | -2.741       |
| 2     | 250      | 17       | -2.833       |
| 3     | 500      | 21.2     | -3.054       |
| 4     | 750      | 26.2     | -3.266       |
| 5     | 1000     | 32.3     | -3.475       |
| 6     | 1250     | 39.6     | -3.679       |
| 7     | 1500     | 48.5     | -3.882       |

1/Viscosity vs. Pressure Plot for (EOM)Mpyrr TFSA at 90 °C  
 Data from Gacino et al. 10.1016/j.jct.2012.05.007

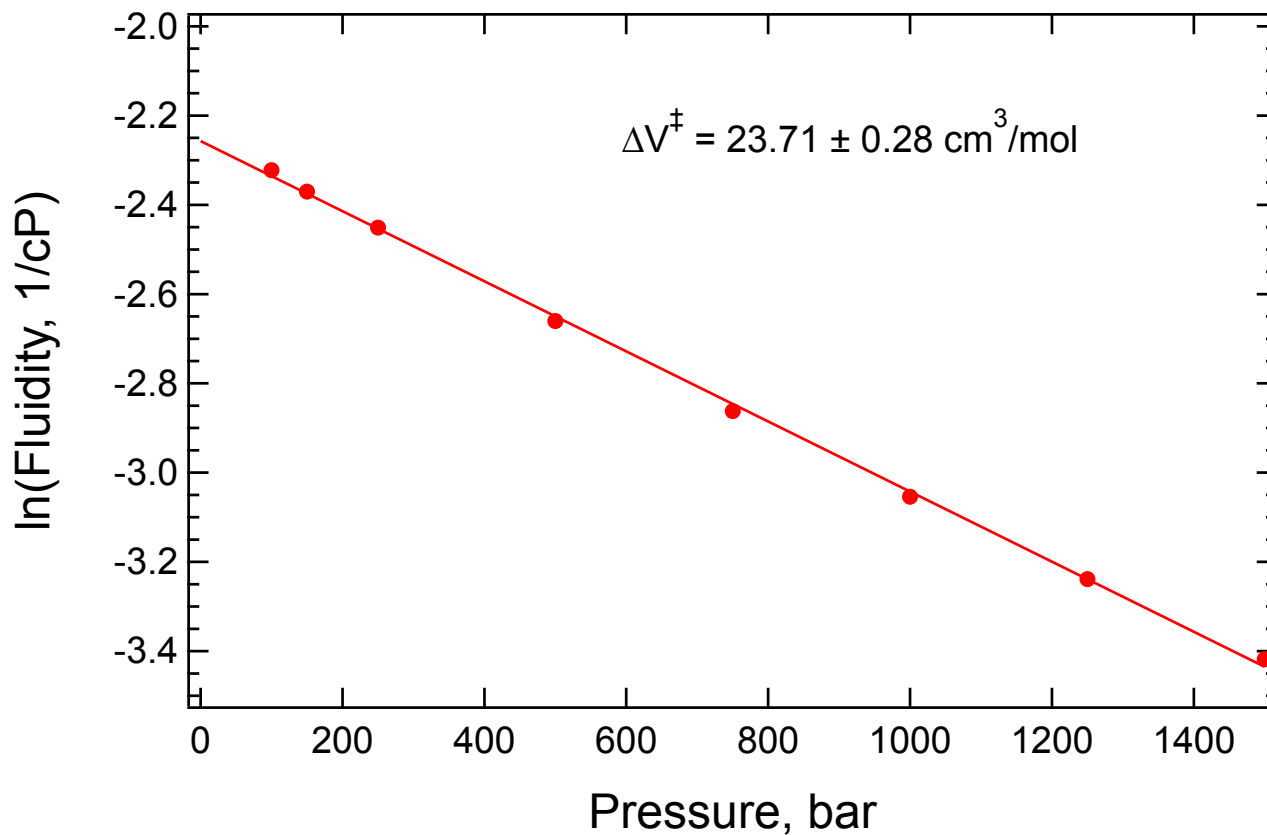

| Point | Pressure | Visc, cP | ln(Fluidity) |
|-------|----------|----------|--------------|
| 0     | 100      | 10.2     | -2.322       |
| 1     | 150      | 10.7     | -2.370       |
| 2     | 250      | 11.6     | -2.451       |
| 3     | 500      | 14.3     | -2.660       |
| 4     | 750      | 17.5     | -2.862       |
| 5     | 1000     | 21.2     | -3.054       |
| 6     | 1250     | 25.5     | -3.239       |
| 7     | 1500     | 30.5     | -3.418       |

# 1/Viscosity vs. Pressure Plot for HMIM BF<sub>4</sub> at 21.7 °C

Data from Sanmamed et al. 10.1016/j.jct.2009.11.014

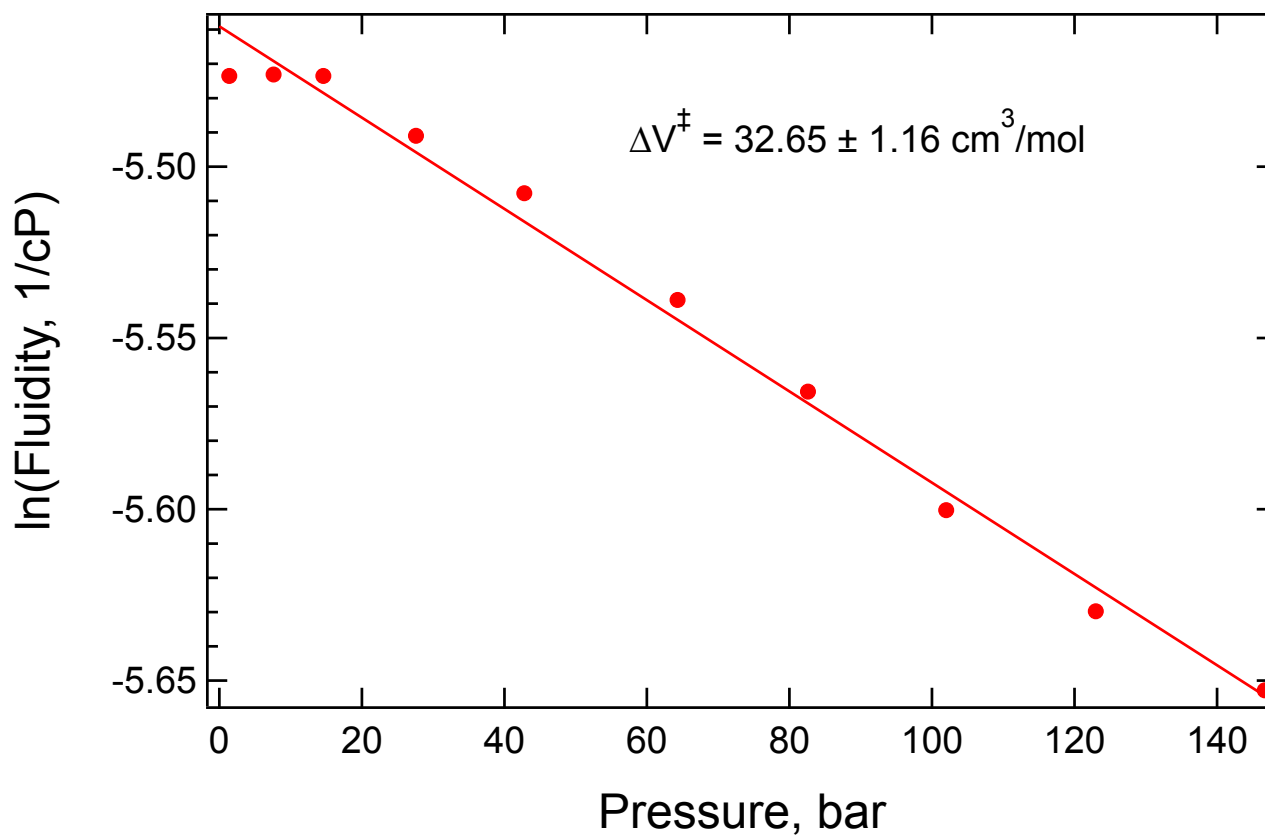

| Point | Pressure | Visc, cP | ln(Fluidity) |
|-------|----------|----------|--------------|
| 0     | 1.4      | 238.3    | -5.474       |
| 1     | 7.6      | 238.2    | -5.473       |
| 2     | 14.6     | 238.3    | -5.474       |
| 3     | 27.6     | 242.5    | -5.491       |
| 4     | 42.8     | 246.6    | -5.508       |
| 5     | 64.3     | 254.4    | -5.539       |
| 6     | 82.6     | 261.3    | -5.566       |
| 7     | 102      | 270.5    | -5.600       |
| 8     | 123      | 278.6    | -5.630       |
| 9     | 146.7    | 285.1    | -5.653       |



# 1/Viscosity vs. Pressure Plot for HMIM BF<sub>4</sub> at 25 °C

Data from Ahosseini and Scurto 10.1007/s10765-008-0497-7

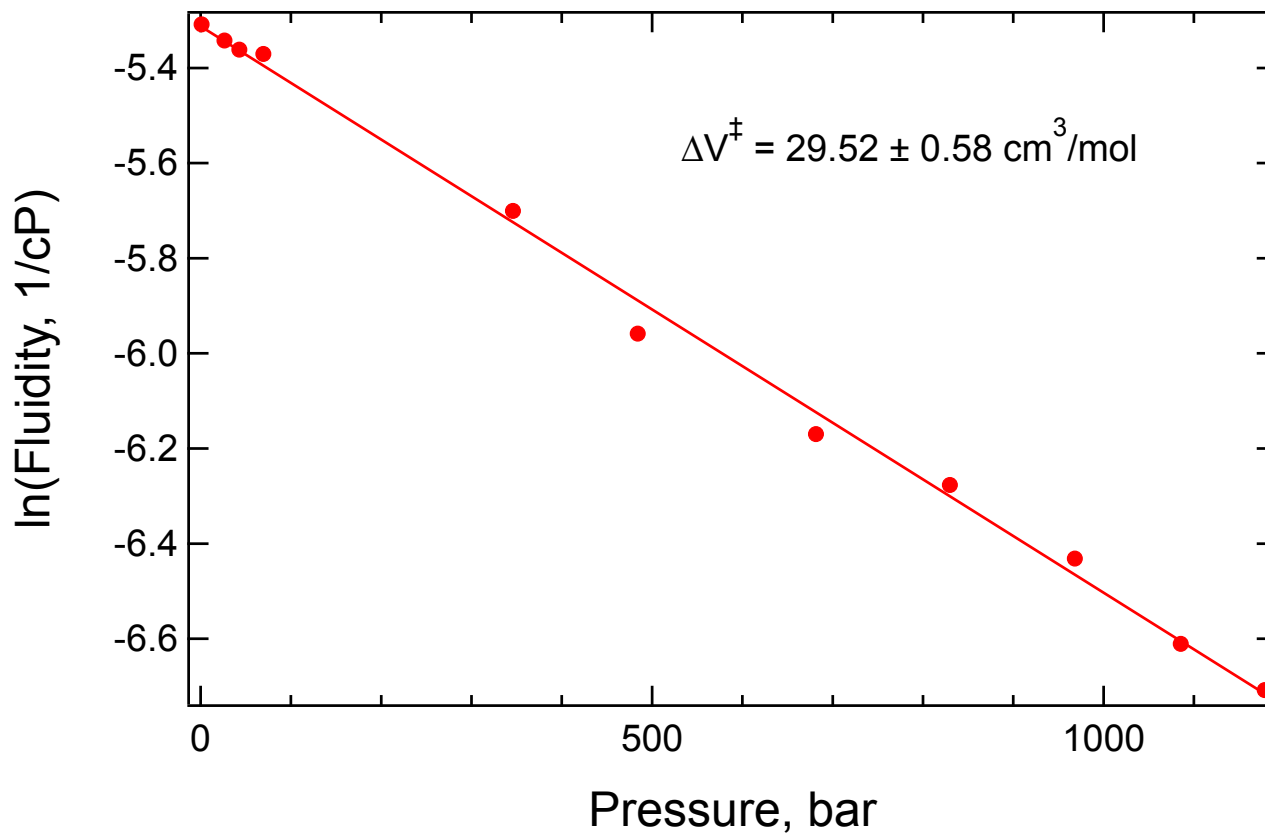

| Point | Pressure | Visc, cP | ln(Fluidity) |
|-------|----------|----------|--------------|
| 0     | 1        | 2.02e+02 | -5.308       |
| 1     | 26.4     | 2.09e+02 | -5.342       |
| 2     | 42.9     | 2.13e+02 | -5.361       |
| 3     | 69.5     | 2.15e+02 | -5.371       |
| 4     | 345.9    | 2.99e+02 | -5.700       |
| 5     | 484      | 3.87e+02 | -5.958       |
| 6     | 681.4    | 4.78e+02 | -6.170       |
| 7     | 829.7    | 5.32e+02 | -6.277       |
| 8     | 968.2    | 6.21e+02 | -6.431       |
| 9     | 1085.5   | 7.43e+02 | -6.611       |
| 10    | 1178.5   | 8.19e+02 | -6.708       |

# 1/Viscosity vs. Pressure Plot for HMIM BF<sub>4</sub> at 50 °C

Data from Ahosseini and Scurto 10.1007/s10765-008-0497-7

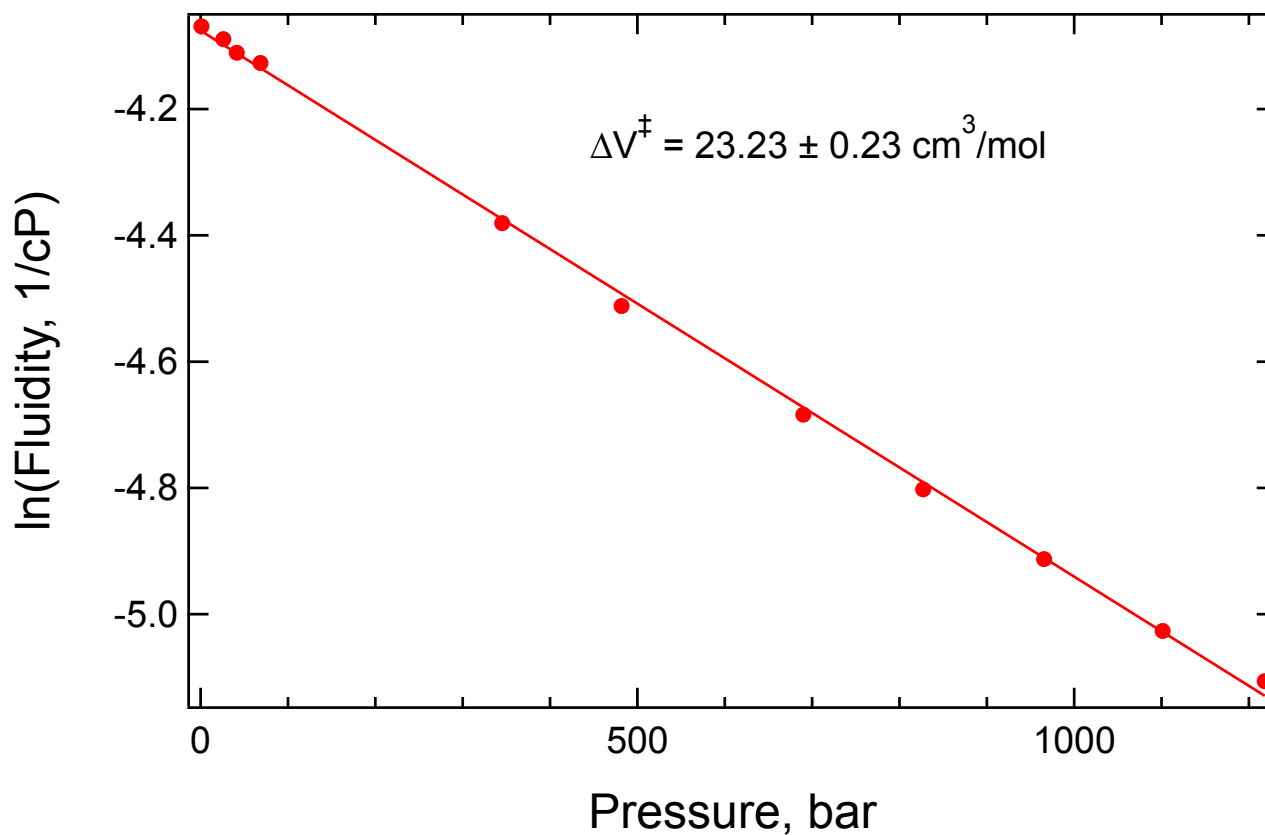

| Point | Pressure | Visc, cP | ln(Fluidity) |
|-------|----------|----------|--------------|
| 0     | 1        | 58.5     | -4.069       |
| 1     | 26       | 59.7     | -4.089       |
| 2     | 41.3     | 61       | -4.111       |
| 3     | 68.5     | 62       | -4.127       |
| 4     | 345.2    | 79.9     | -4.381       |
| 5     | 481.8    | 91.1     | -4.512       |
| 6     | 689.9    | 108.2    | -4.684       |
| 7     | 827.1    | 121.8    | -4.802       |
| 8     | 965.5    | 136      | -4.913       |
| 9     | 1101.2   | 152.4    | -5.027       |
| 10    | 1218.1   | 165      | -5.106       |

# 1/Viscosity vs. Pressure Plot for HMIM BF<sub>4</sub> at 70 °C

Data from Ahosseini and Scurto 10.1007/s10765-008-0497-7

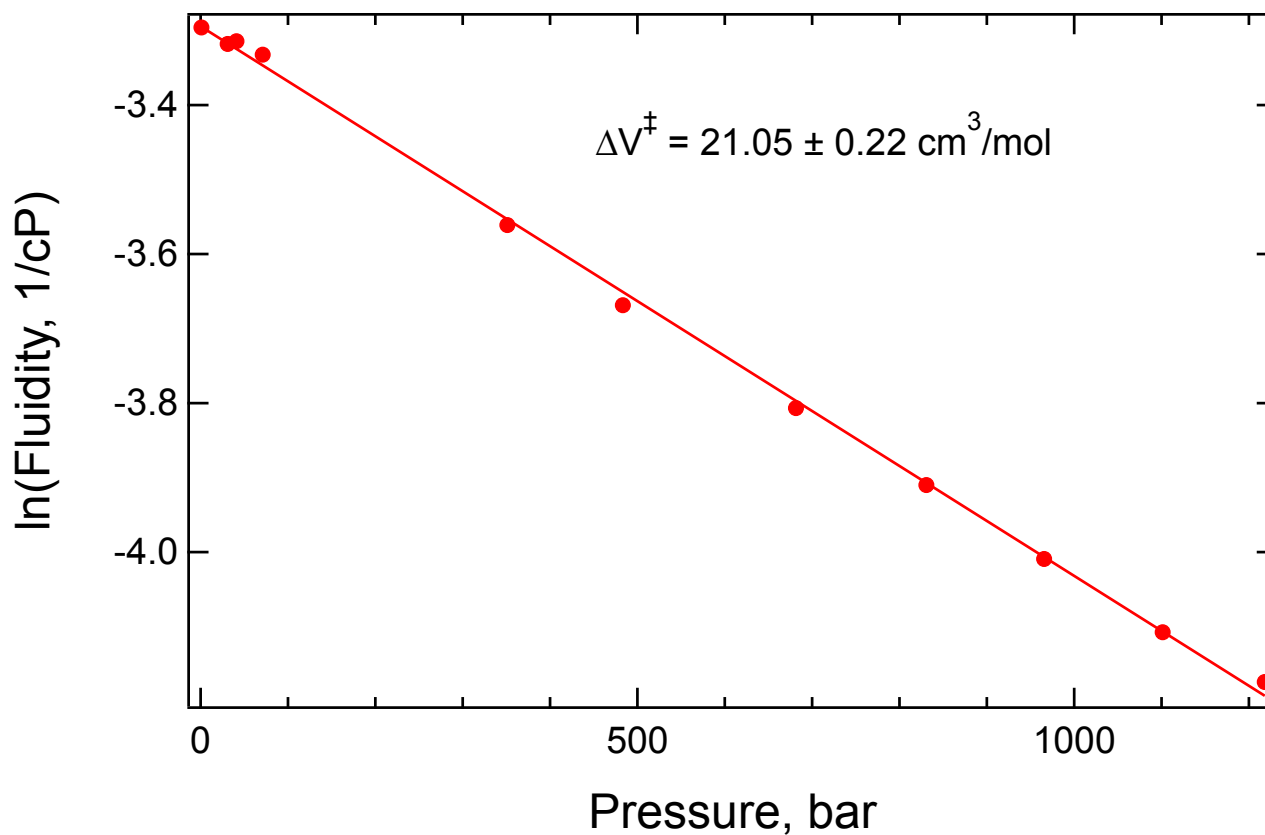

| Point | Pressure | Visc, cP | ln(Fluidity) |
|-------|----------|----------|--------------|
| 0     | 1        | 27       | -3.296       |
| 1     | 31       | 27.6     | -3.318       |
| 2     | 41       | 27.5     | -3.314       |
| 3     | 71       | 28       | -3.332       |
| 4     | 351      | 35.2     | -3.561       |
| 5     | 483.4    | 39.2     | -3.669       |
| 6     | 681.4    | 45       | -3.807       |
| 7     | 830.8    | 49.9     | -3.910       |
| 8     | 965.5    | 55.1     | -4.009       |
| 9     | 1101.2   | 60.8     | -4.108       |
| 10    | 1218.1   | 65       | -4.174       |

# 1/Viscosity vs. Pressure Plot for HMIM PF<sub>6</sub> at 25 °C

Data from Ahosseini and Scurto 10.1007/s10765-008-0497-7

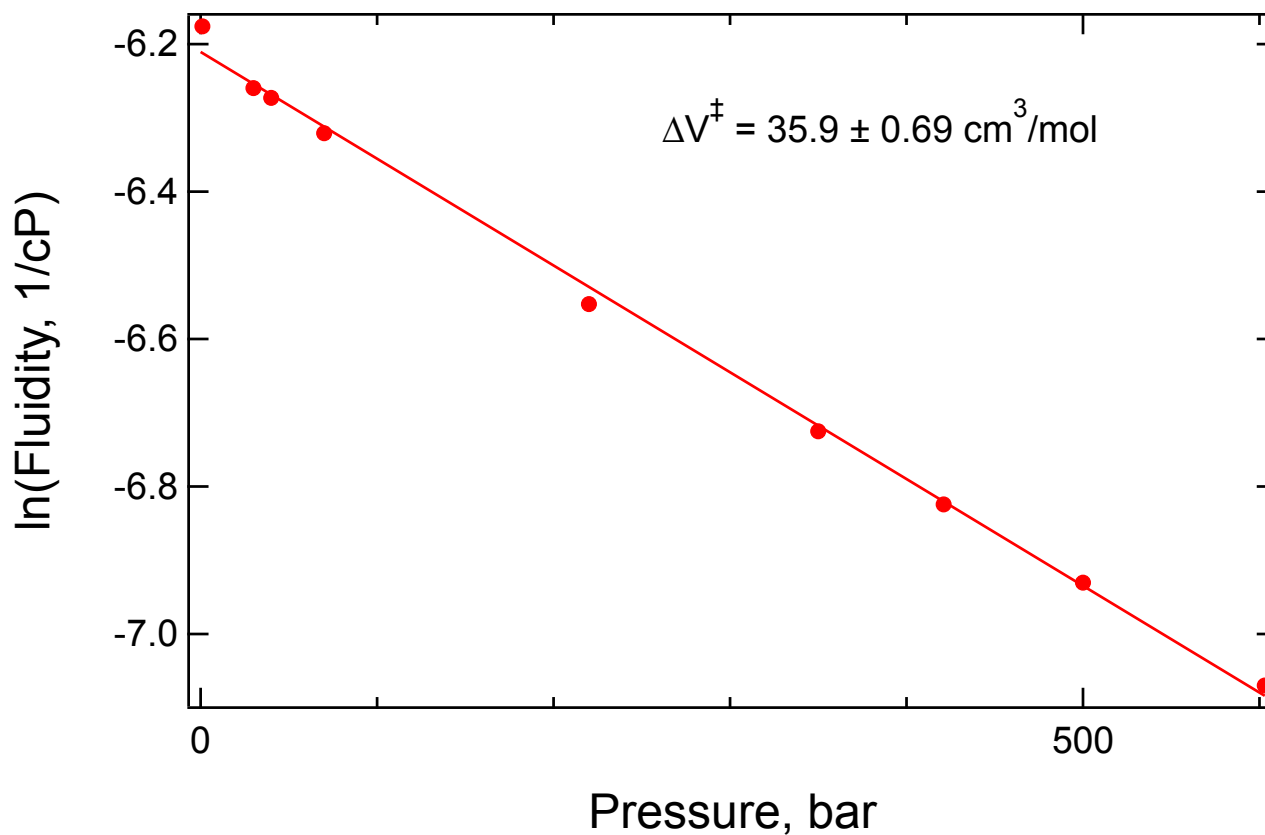

| Point | Pressure | Visc, cP | ln(Fluidity) |
|-------|----------|----------|--------------|
| 0     | 1        | 481      | -6.176       |
| 1     | 29.9     | 523      | -6.260       |
| 2     | 40       | 530      | -6.273       |
| 3     | 70       | 556      | -6.321       |
| 4     | 220      | 701      | -6.553       |
| 5     | 350      | 833      | -6.725       |
| 6     | 421      | 920      | -6.824       |
| 7     | 500      | 1023     | -6.930       |
| 8     | 603      | 1176     | -7.070       |

# 1/Viscosity vs. Pressure Plot for HMIM PF<sub>6</sub> at 25 °C

Data from Harris et al. 10.1021/je700032n

J. Chem. Eng. Data 2007, 52, 1080-1085

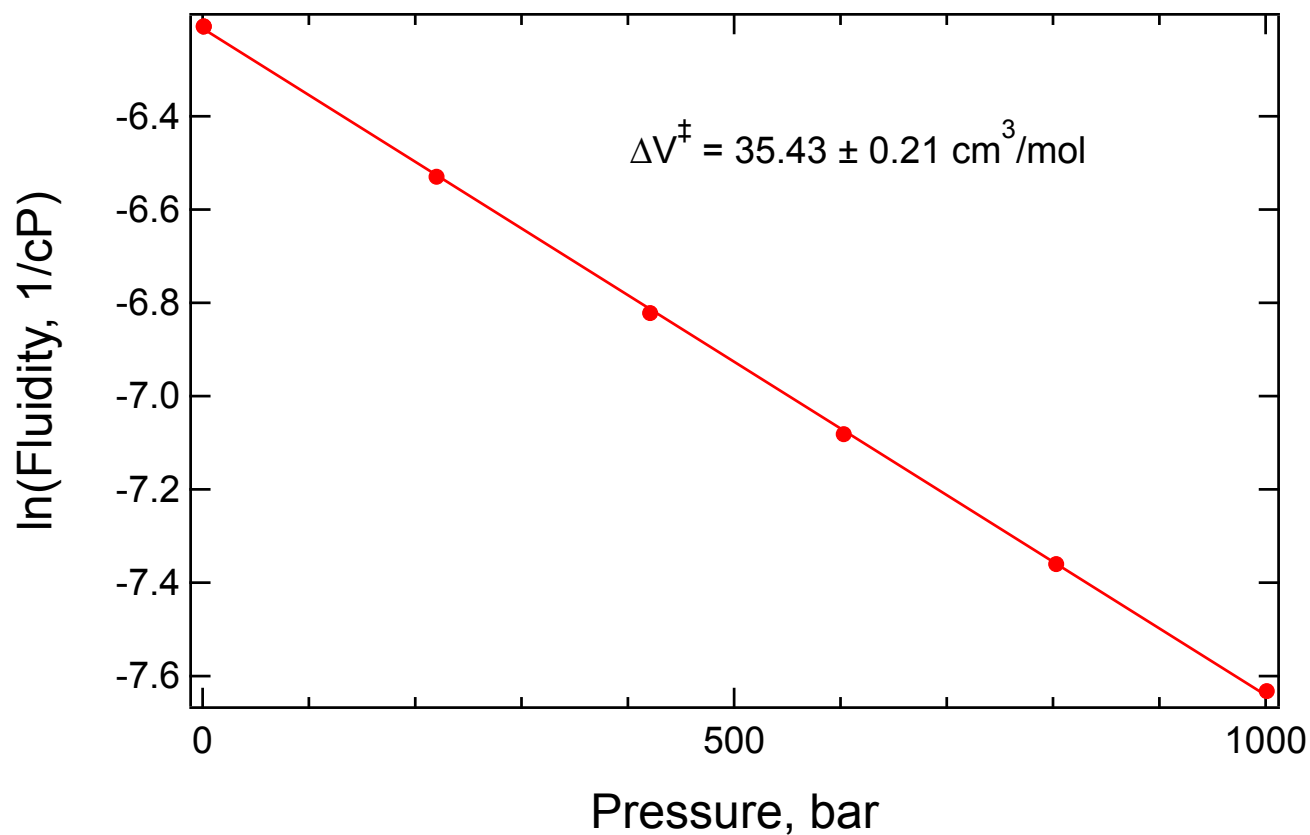

| Point | Pressure | Visc, cP | ln(Fluidity) |
|-------|----------|----------|--------------|
| 0     | 1        | 496.5    | -6.208       |
| 1     | 1        | 496.4    | -6.207       |
| 2     | 220      | 685.3    | -6.530       |
| 3     | 421      | 917.7    | -6.822       |
| 4     | 603      | 1190     | -7.082       |
| 5     | 803      | 1572     | -7.360       |
| 6     | 1001     | 2064     | -7.632       |

# 1/Viscosity vs. Pressure Plot for HMIM PF<sub>6</sub> at 50 °C

Data from Ahosseini and Scurto 10.1007/s10765-008-0497-7

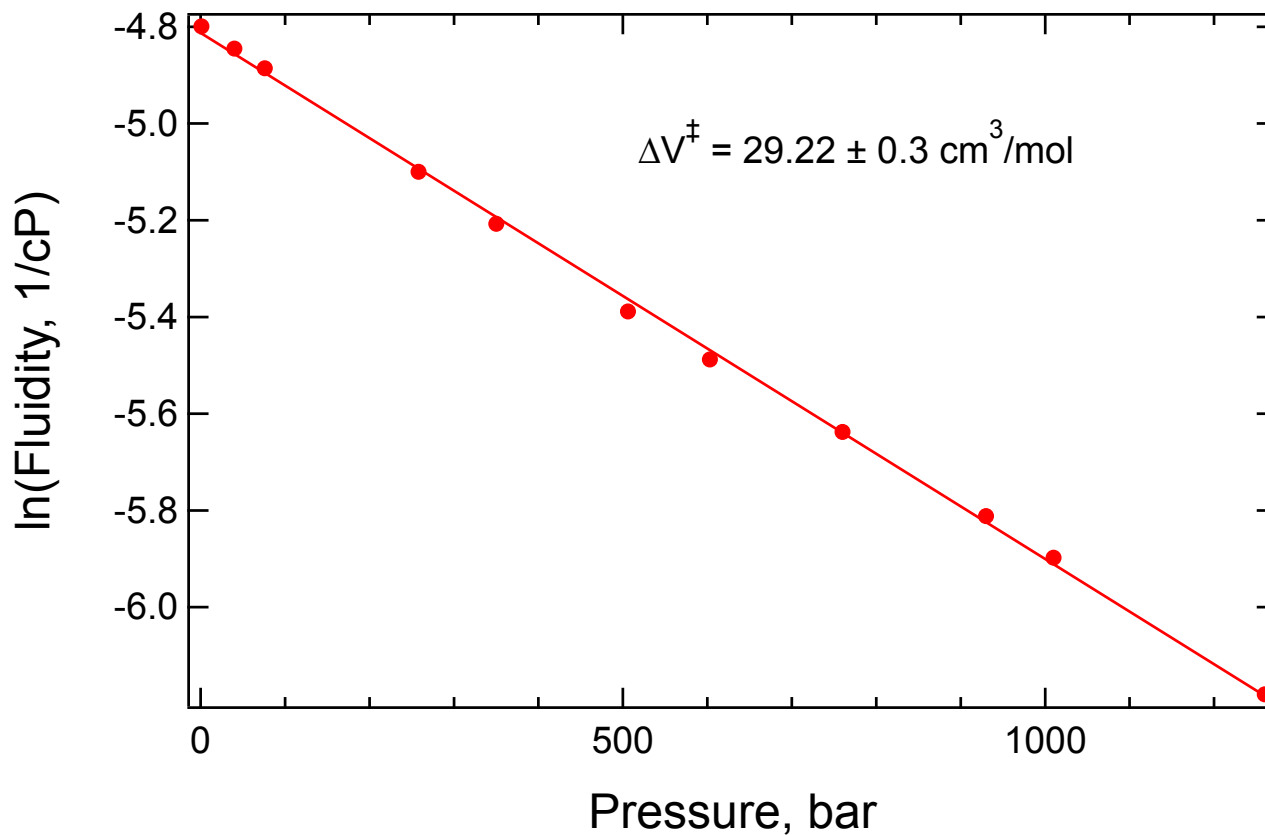

| Point | Pressure | Visc, cP | ln(Fluidity) |
|-------|----------|----------|--------------|
| 0     | 1        | 121.4    | -4.799       |
| 1     | 40       | 127.1    | -4.845       |
| 2     | 76       | 132.4    | -4.886       |
| 3     | 258      | 164      | -5.100       |
| 4     | 350      | 182.6    | -5.207       |
| 5     | 506      | 218.9    | -5.389       |
| 6     | 603      | 241.7    | -5.488       |
| 7     | 760      | 280.8    | -5.638       |
| 8     | 930      | 334.2    | -5.812       |
| 9     | 1010     | 364.2    | -5.898       |
| 10    | 1260     | 483.1    | -6.180       |

# 1/Viscosity vs. Pressure Plot for HMIM PF<sub>6</sub> at 50 °C

Data from Harris et al. 10.1021/je700032n

J. Chem. Eng. Data 2007, 52, 1080-1085

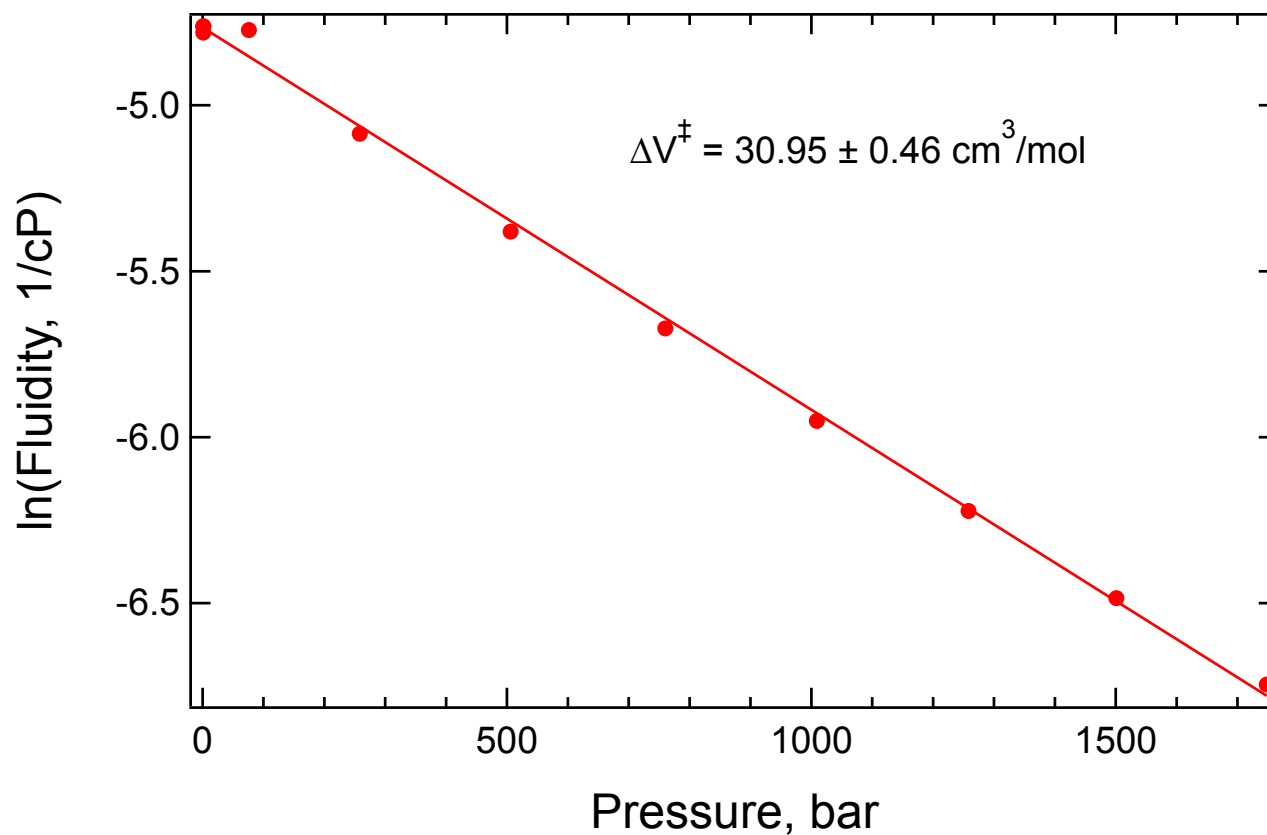

| Point | Pressure | Visc, cP | ln(Fluidity) |
|-------|----------|----------|--------------|
| 0     | 1        | 119.2    | -4.781       |
| 1     | 1        | 117      | -4.762       |
| 2     | 1        | 117      | -4.762       |
| 3     | 76       | 118.3    | -4.773       |
| 4     | 258      | 161.7    | -5.086       |
| 5     | 506      | 217.1    | -5.380       |
| 6     | 760      | 290.7    | -5.672       |
| 7     | 1009     | 384      | -5.951       |
| 8     | 1258     | 503.9    | -6.222       |
| 9     | 1501     | 655      | -6.485       |
| 10    | 1748     | 850.1    | -6.745       |

# 1/Viscosity vs. Pressure Plot for HMIM PF<sub>6</sub> at 60 °C

Data from Harris et al. 10.1021/je700032n

J. Chem. Eng. Data 2007, 52, 1080-1085

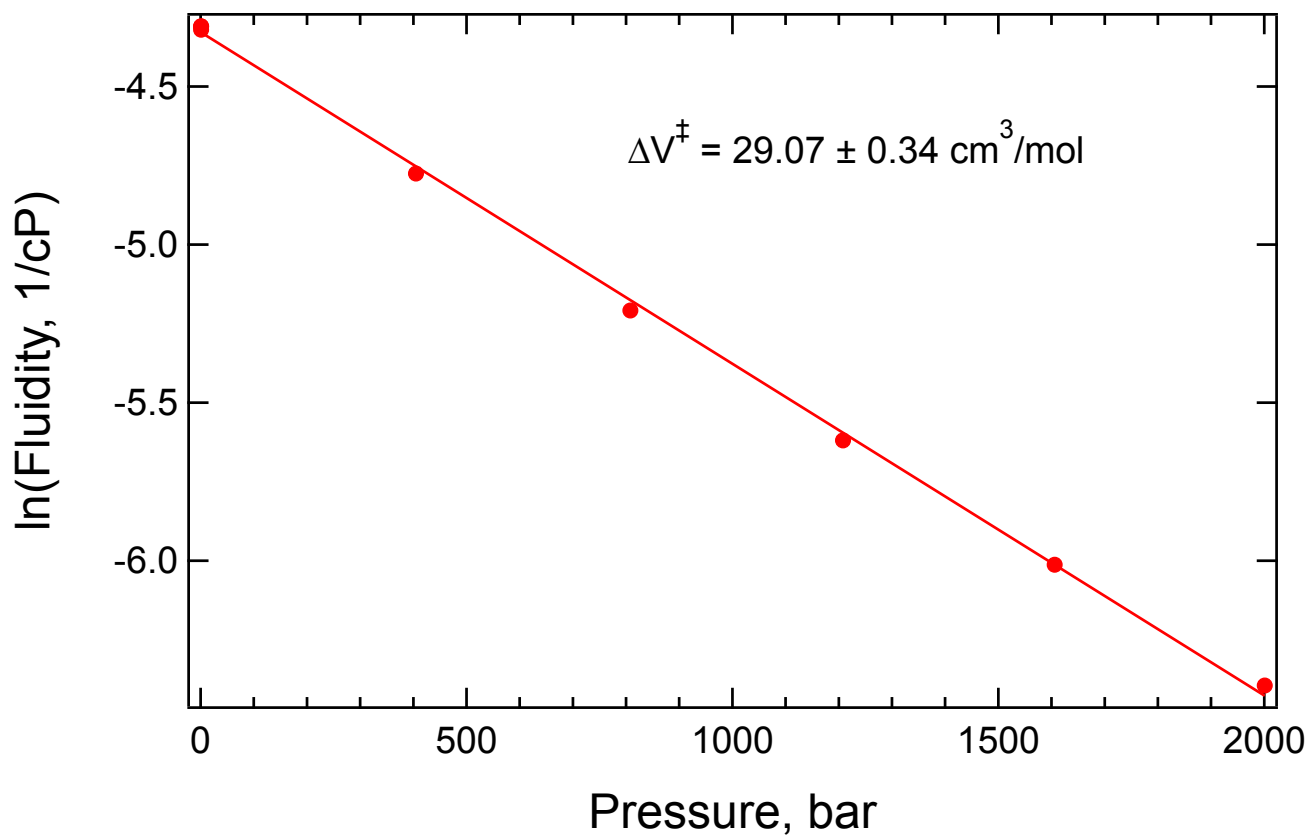

| Point | Pressure | Visc, cP | ln(Fluidity) |
|-------|----------|----------|--------------|
| 0     | 1        | 75.2     | -4.320       |
| 1     | 1        | 74.4     | -4.309       |
| 2     | 1        | 74.4     | -4.309       |
| 3     | 405      | 118.5    | -4.775       |
| 4     | 808      | 182.8    | -5.208       |
| 5     | 1208     | 275.7    | -5.619       |
| 6     | 1606     | 408.7    | -6.013       |
| 7     | 2001     | 598.9    | -6.395       |



# 1/Viscosity vs. Pressure Plot for HMIM PF<sub>6</sub> at 70 °C

Data from Ahosseini and Scurto 10.1007/s10765-008-0497-7

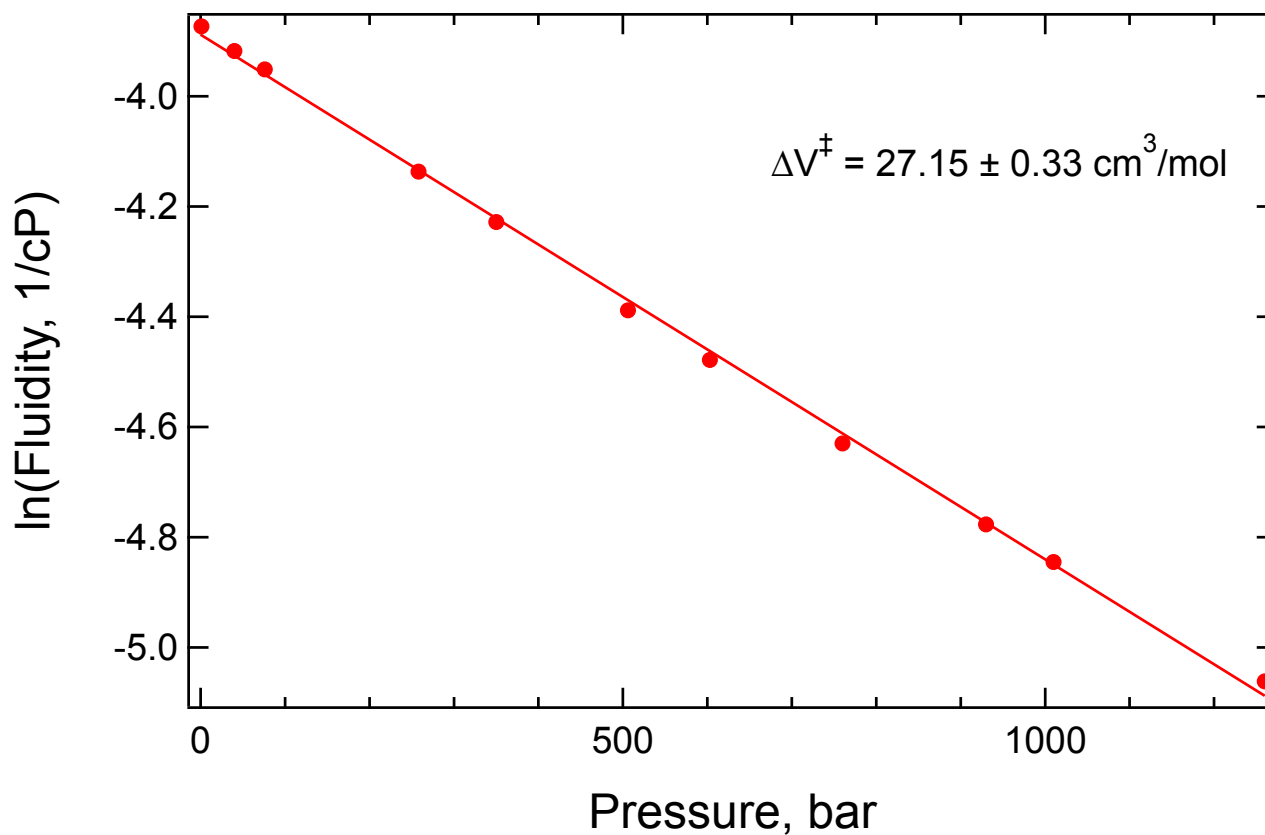

| Point | Pressure | Visc, cP | ln(Fluidity) |
|-------|----------|----------|--------------|
| 0     | 1        | 48.1     | -3.873       |
| 1     | 40       | 50.3     | -3.918       |
| 2     | 76       | 52       | -3.951       |
| 3     | 258      | 62.6     | -4.137       |
| 4     | 350      | 68.6     | -4.228       |
| 5     | 506      | 80.5     | -4.388       |
| 6     | 603      | 88.1     | -4.478       |
| 7     | 760      | 102.5    | -4.630       |
| 8     | 930      | 118.7    | -4.777       |
| 9     | 1010     | 127.1    | -4.845       |
| 10    | 1260     | 157.8    | -5.061       |

# 1/Viscosity vs. Pressure Plot for HMIM PF<sub>6</sub> at 75 °C

Data from Harris et al. 10.1021/je700032n

J. Chem. Eng. Data 2007, 52, 1080-1085

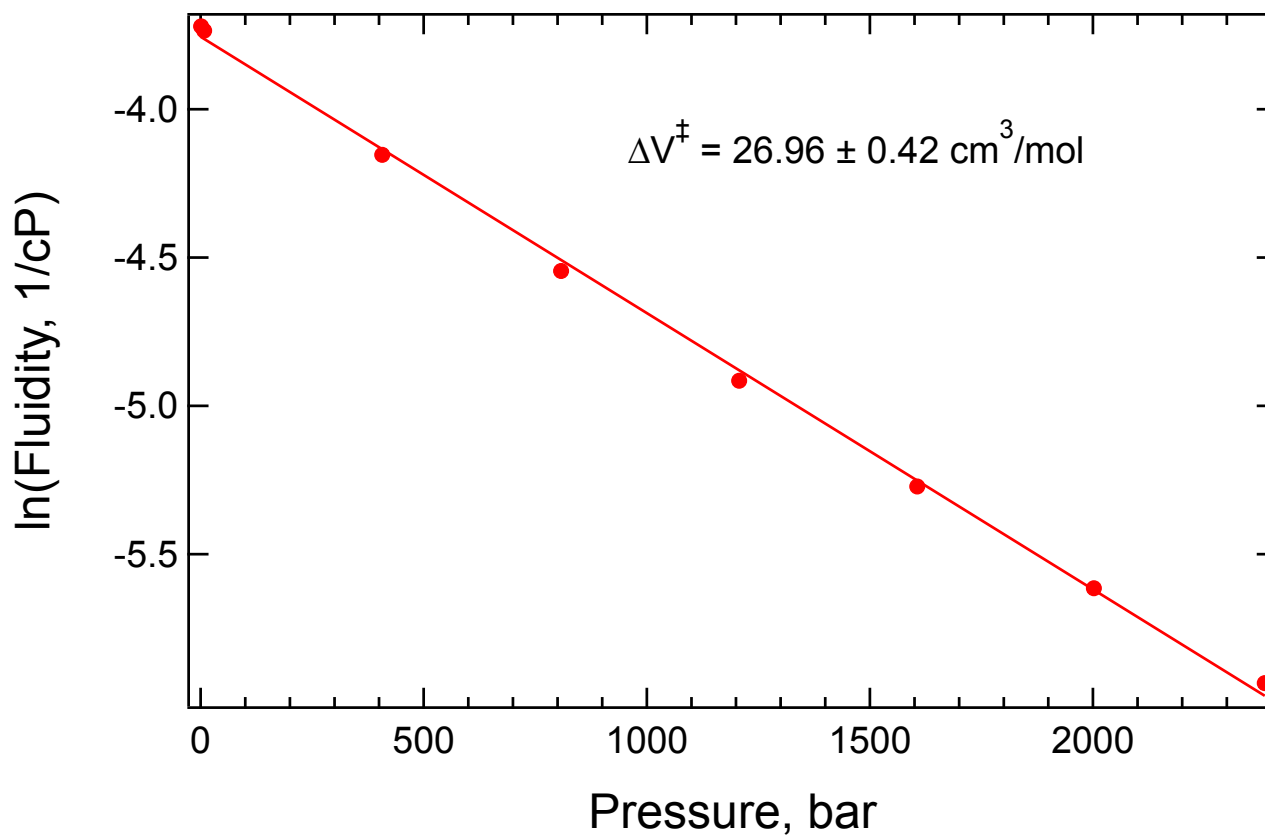

| Point | Pressure | Visc, cP | ln(Fluidity) |
|-------|----------|----------|--------------|
| 0     | 1        | 41.3     | -3.721       |
| 1     | 8        | 41.9     | -3.735       |
| 2     | 407      | 63.7     | -4.154       |
| 3     | 808      | 94.2     | -4.545       |
| 4     | 1207     | 136.4    | -4.916       |
| 5     | 1606     | 194.8    | -5.272       |
| 6     | 2002     | 274.5    | -5.615       |
| 7     | 2385     | 378      | -5.935       |

1/Viscosity vs. Pressure Plot for HMIM TFSA at 25 °C  
 Data from Ahosseini and Scurto 10.1007/s10765-008-0497-7

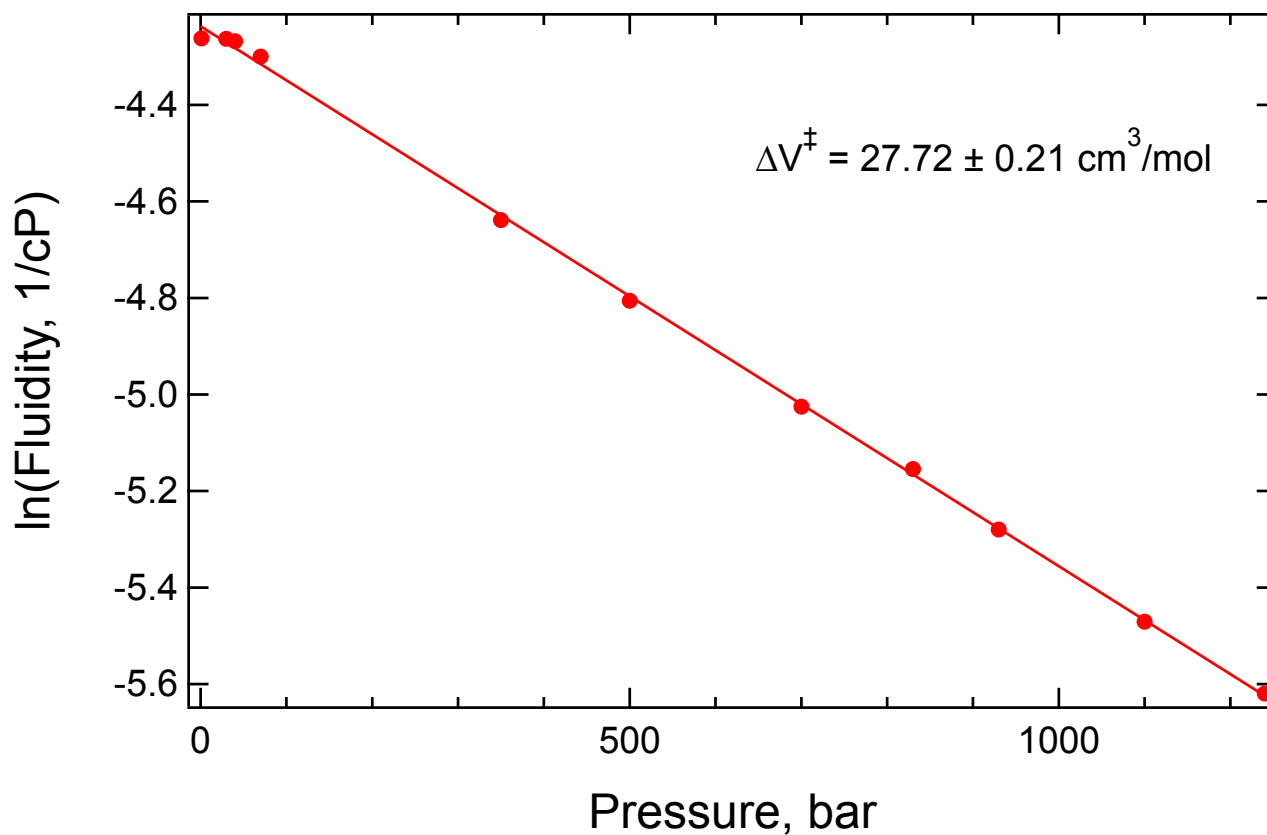

| Point | Pressure | Visc, cP | ln(Fluidity) |
|-------|----------|----------|--------------|
| 0     | 1        | 70.96    | -4.262       |
| 1     | 29.9     | 71.04    | -4.263       |
| 2     | 40       | 71.38    | -4.268       |
| 3     | 70       | 73.71    | -4.300       |
| 4     | 350      | 103.4    | -4.639       |
| 5     | 500      | 122.2    | -4.806       |
| 6     | 700      | 152.2    | -5.025       |
| 7     | 830      | 173.2    | -5.154       |
| 8     | 930      | 196.3    | -5.280       |
| 9     | 1100     | 237.6    | -5.471       |
| 10    | 1240     | 275.7    | -5.619       |

1/Viscosity vs. Pressure Plot for HMIM TFSA at 50 °C  
 Data from Ahosseini and Scurto 10.1007/s10765-008-0497-7

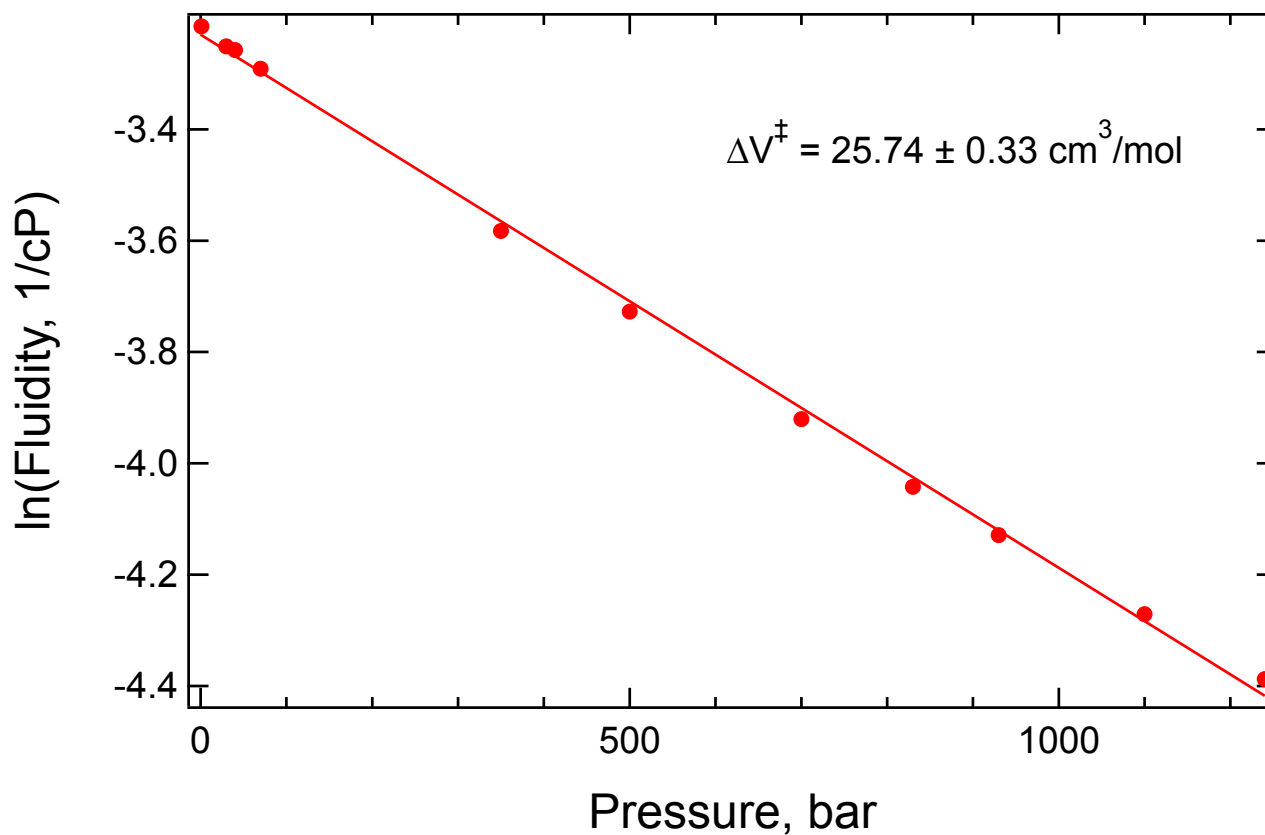

| Point | Pressure | Visc, cP | ln(Fluidity) |
|-------|----------|----------|--------------|
| 0     | 1        | 24.9     | -3.215       |
| 1     | 29.9     | 25.81    | -3.251       |
| 2     | 40       | 25.98    | -3.257       |
| 3     | 70       | 26.87    | -3.291       |
| 4     | 350      | 35.96    | -3.582       |
| 5     | 500      | 41.57    | -3.727       |
| 6     | 700      | 50.43    | -3.921       |
| 7     | 830      | 56.96    | -4.042       |
| 8     | 930      | 62.11    | -4.129       |
| 9     | 1100     | 71.6     | -4.271       |
| 10    | 1240     | 80.46    | -4.388       |

# 1/Viscosity vs. Pressure Plot for HMIM TFSA at 70 °C

Data from Ahosseini and Scurto 10.1007/s10765-008-0497-7

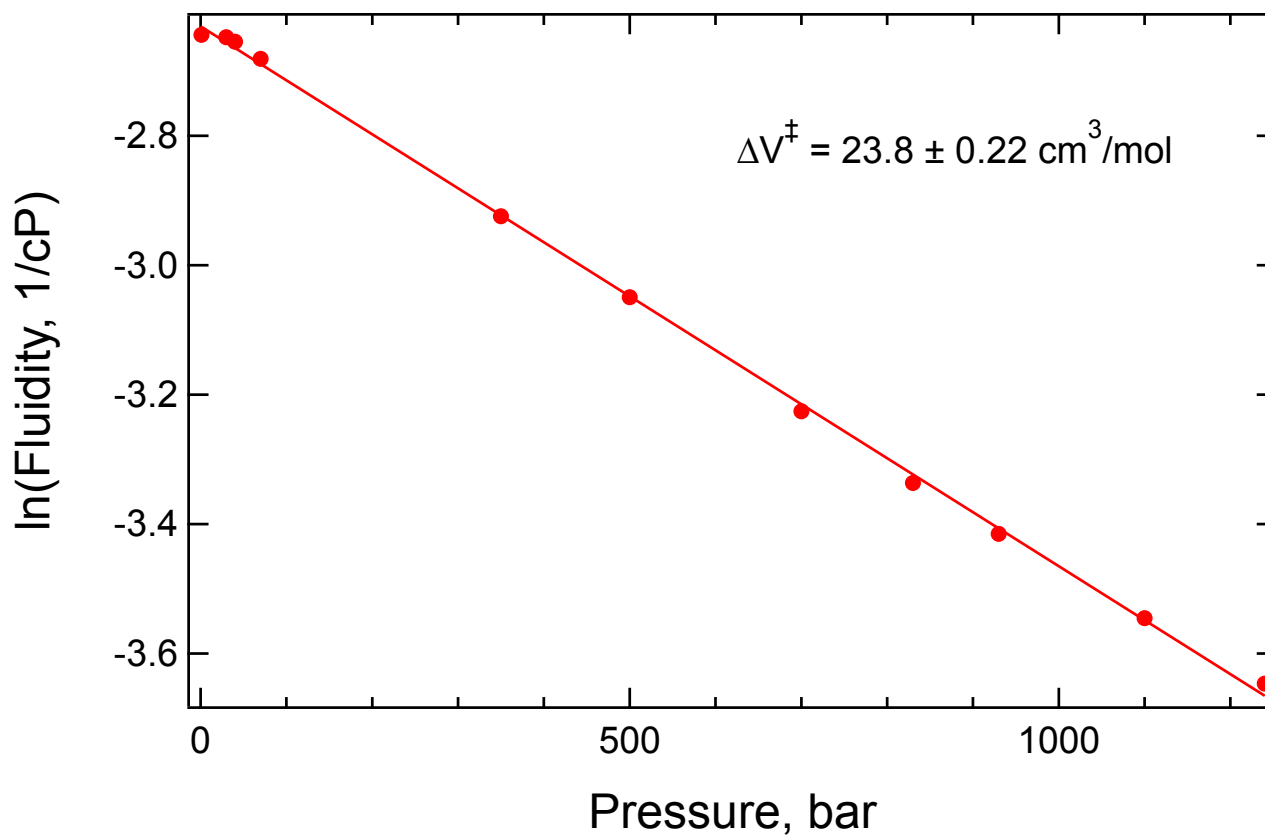

| Point | Pressure | Visc, cP | ln(Fluidity) |
|-------|----------|----------|--------------|
| 0     | 1        | 14.07    | -2.644       |
| 1     | 29.9     | 14.12    | -2.648       |
| 2     | 40       | 14.22    | -2.655       |
| 3     | 70       | 14.6     | -2.681       |
| 4     | 350      | 18.62    | -2.924       |
| 5     | 500      | 21.1     | -3.049       |
| 6     | 700      | 25.17    | -3.226       |
| 7     | 830      | 28.12    | -3.336       |
| 8     | 930      | 30.42    | -3.415       |
| 9     | 1100     | 34.65    | -3.545       |
| 10    | 1240     | 38.34    | -3.646       |

# 1/Viscosity vs. Pressure Plot for OMIM BF<sub>4</sub> at 20.5 °C

Data from Sanmamed et al. 10.1016/j.jct.2009.11.014

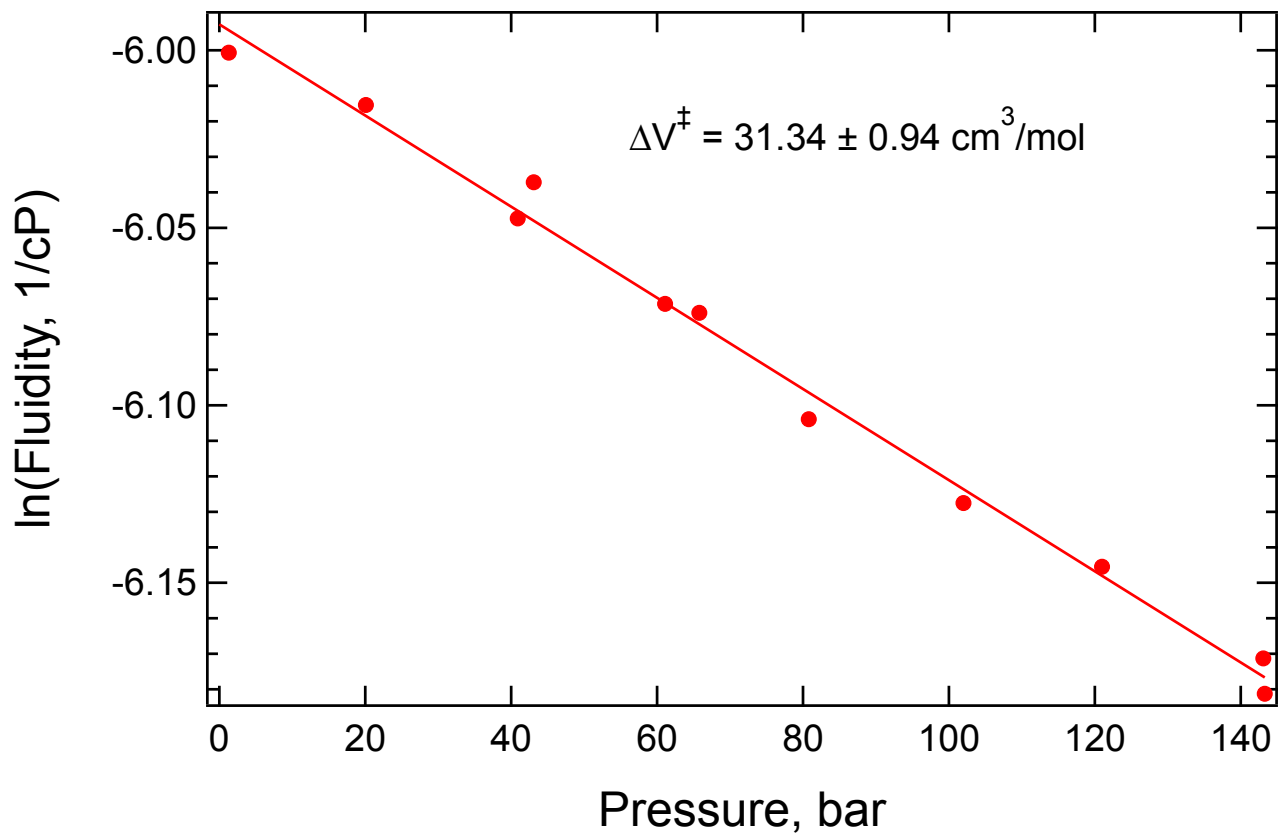

| Point | Pressure | Visc, cP | ln(Fluidity) |
|-------|----------|----------|--------------|
| 0     | 1.3      | 403.7    | -6.001       |
| 1     | 20.1     | 409.7    | -6.015       |
| 2     | 40.9     | 423      | -6.047       |
| 3     | 43.1     | 418.7    | -6.037       |
| 4     | 61.1     | 433.3    | -6.071       |
| 5     | 65.8     | 434.4    | -6.074       |
| 6     | 80.8     | 447.6    | -6.104       |
| 7     | 102      | 458.3    | -6.128       |
| 8     | 121      | 466.6    | -6.145       |
| 9     | 143.1    | 478.8    | -6.171       |
| 10    | 143.3    | 483.6    | -6.181       |

# 1/Viscosity vs. Pressure Plot for OMIM BF<sub>4</sub> at 25 °C

Data from Harris et al. 10.1021/je060082s

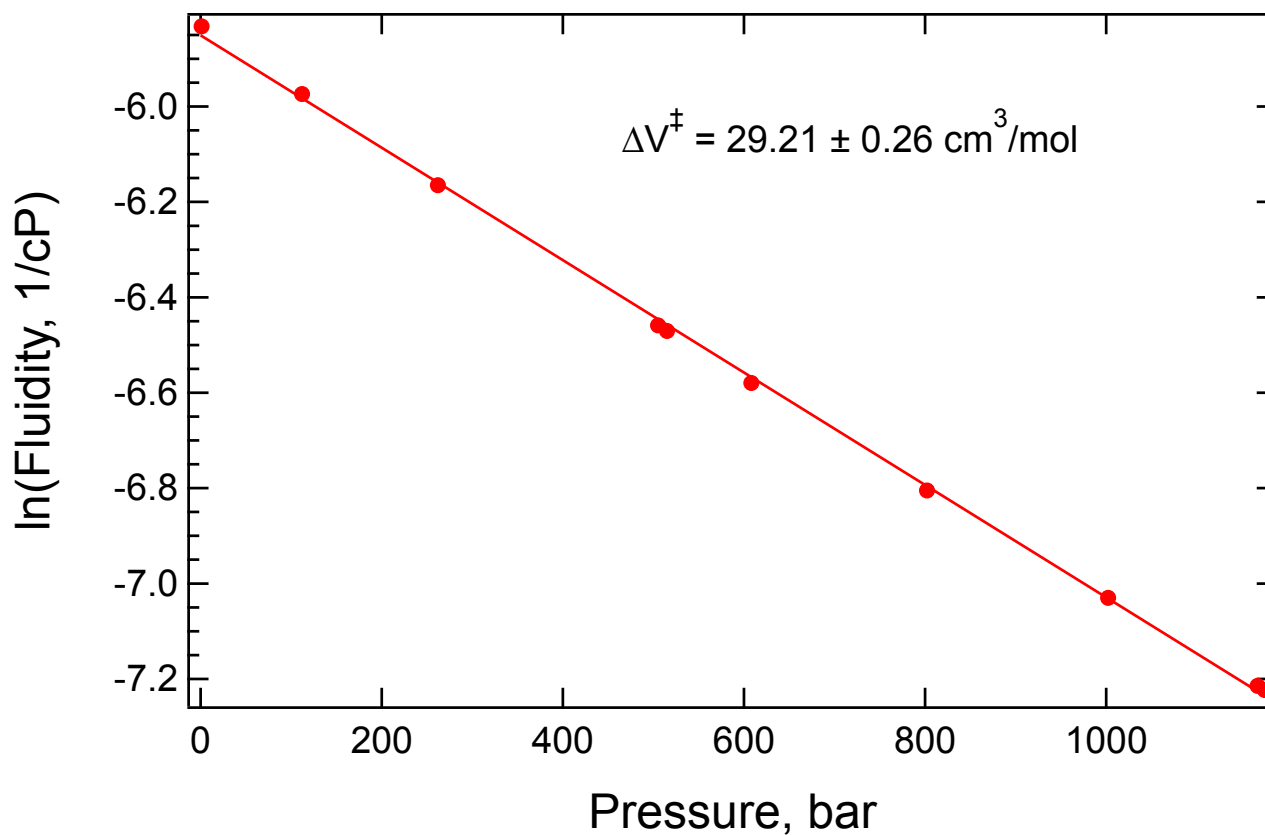

| Point | Pressure | Visc, cP | ln(Fluidity) |
|-------|----------|----------|--------------|
| 0     | 1        | 341      | -5.832       |
| 1     | 112      | 393      | -5.974       |
| 2     | 262      | 475.7    | -6.165       |
| 3     | 505      | 638.3    | -6.459       |
| 4     | 515      | 645.9    | -6.471       |
| 5     | 608      | 720.1    | -6.579       |
| 6     | 802      | 902.3    | -6.805       |
| 7     | 1002     | 1130     | -7.030       |
| 8     | 1167     | 1359     | -7.215       |
| 9     | 1175     | 1371     | -7.223       |

# 1/Viscosity vs. Pressure Plot for OMIM BF<sub>4</sub> at 50 °C

Data from Harris et al. 10.1021/je060082s

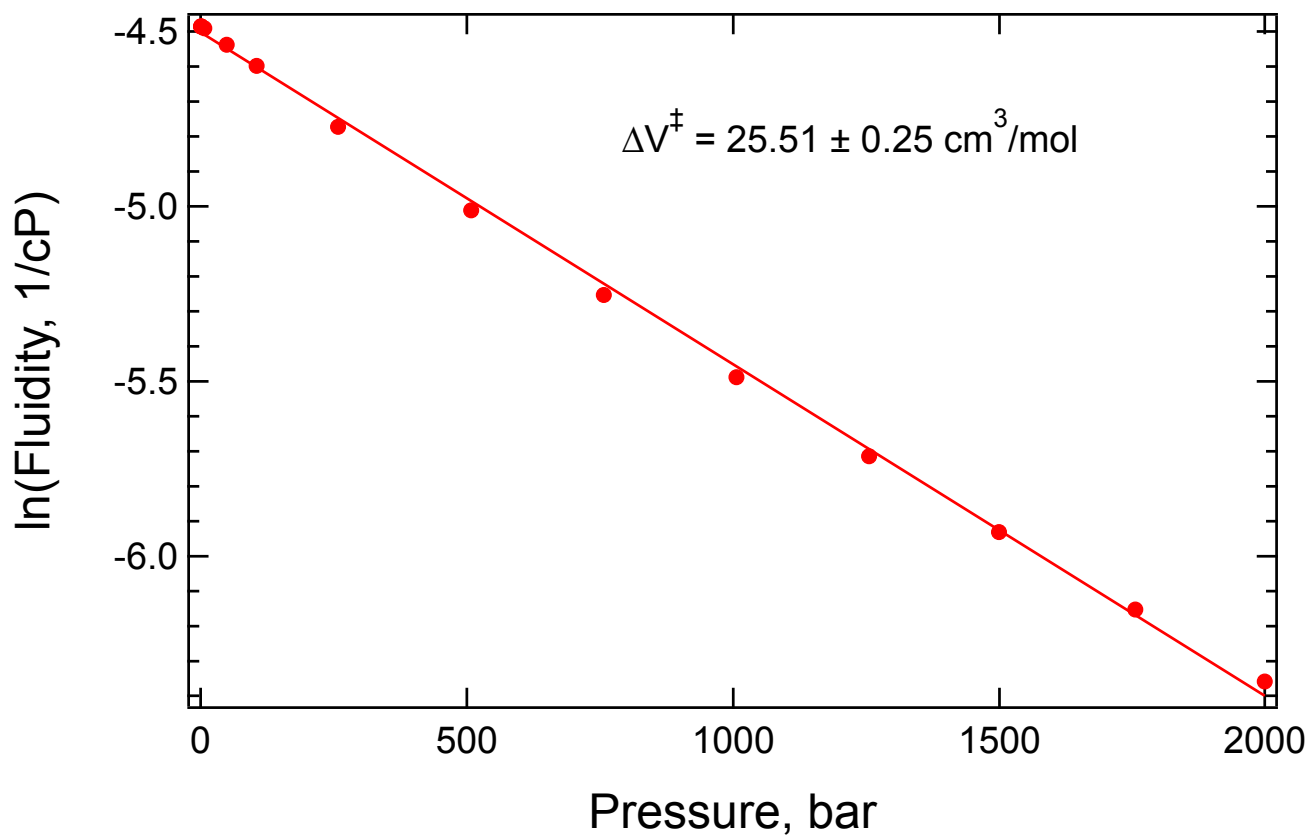

| Point | Pressure | Visc, cP | ln(Fluidity) |
|-------|----------|----------|--------------|
| 0     | 1        | 88.8     | -4.486       |
| 1     | 1        | 88.7     | -4.485       |
| 2     | 1        | 88.7     | -4.485       |
| 3     | 7        | 89.2     | -4.491       |
| 4     | 49       | 93.5     | -4.538       |
| 5     | 105      | 99.3     | -4.598       |
| 6     | 258      | 118.2    | -4.772       |
| 7     | 508      | 150.1    | -5.011       |
| 8     | 757      | 191.2    | -5.253       |
| 9     | 1006     | 241.8    | -5.488       |
| 10    | 1255     | 303.1    | -5.714       |
| 11    | 1499     | 376.5    | -5.931       |
| 12    | 1755     | 469.8    | -6.152       |
| 13    | 1998     | 577.3    | -6.358       |



# 1/Viscosity vs. Pressure Plot for OMIM BF<sub>4</sub> at 60 °C

Data from Harris et al. 10.1021/je060082s

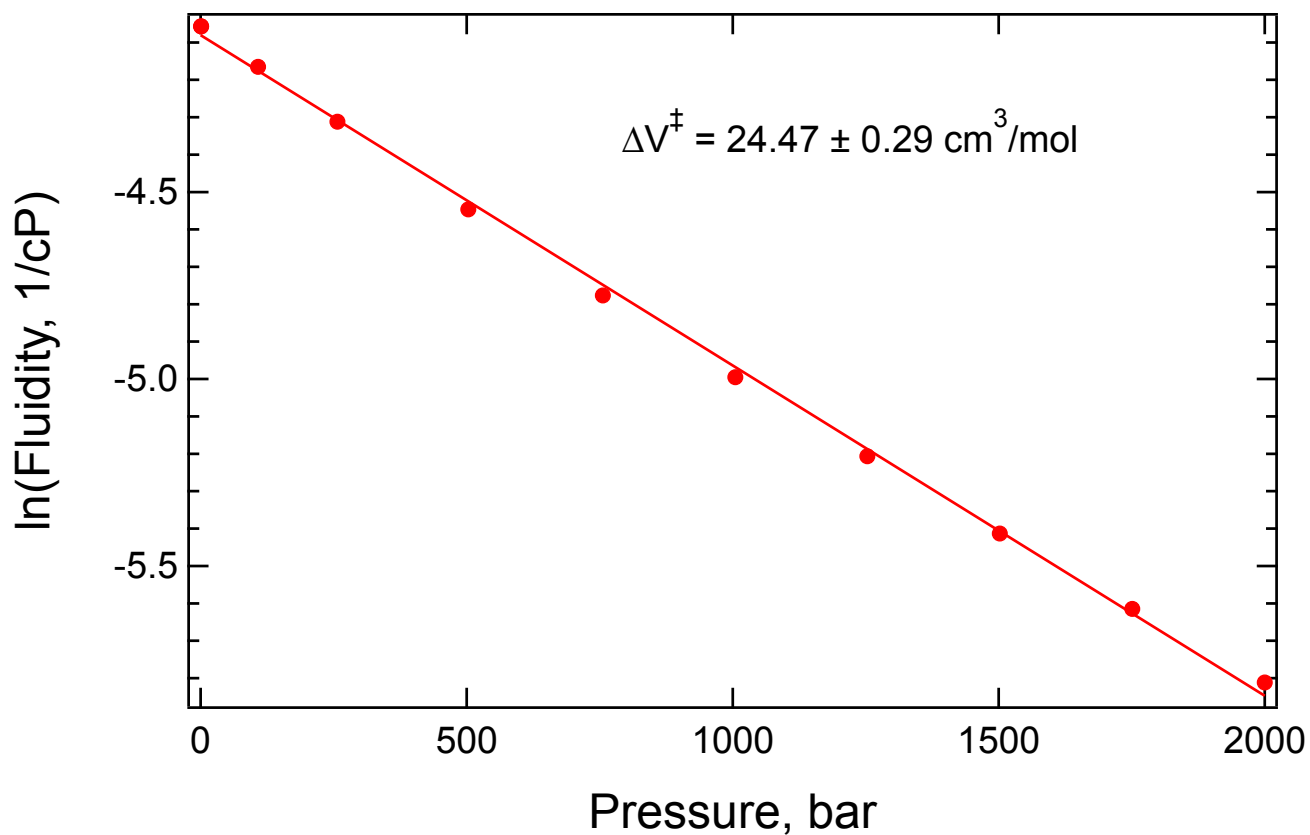

| Point | Pressure | Visc, cP | ln(Fluidity) |
|-------|----------|----------|--------------|
| 0     | 1        | 57.8     | -4.057       |
| 1     | 1        | 57.8     | -4.057       |
| 2     | 108      | 64.4     | -4.165       |
| 3     | 257      | 74.6     | -4.312       |
| 4     | 503      | 94.3     | -4.546       |
| 5     | 756      | 118.7    | -4.777       |
| 6     | 1005     | 147.7    | -4.995       |
| 7     | 1253     | 182.5    | -5.207       |
| 8     | 1502     | 224.3    | -5.413       |
| 9     | 1751     | 274.4    | -5.615       |
| 10    | 2000     | 334.1    | -5.811       |

# 1/Viscosity vs. Pressure Plot for OMIM BF<sub>4</sub> at 75 °C

Data from Harris et al. 10.1021/je060082s

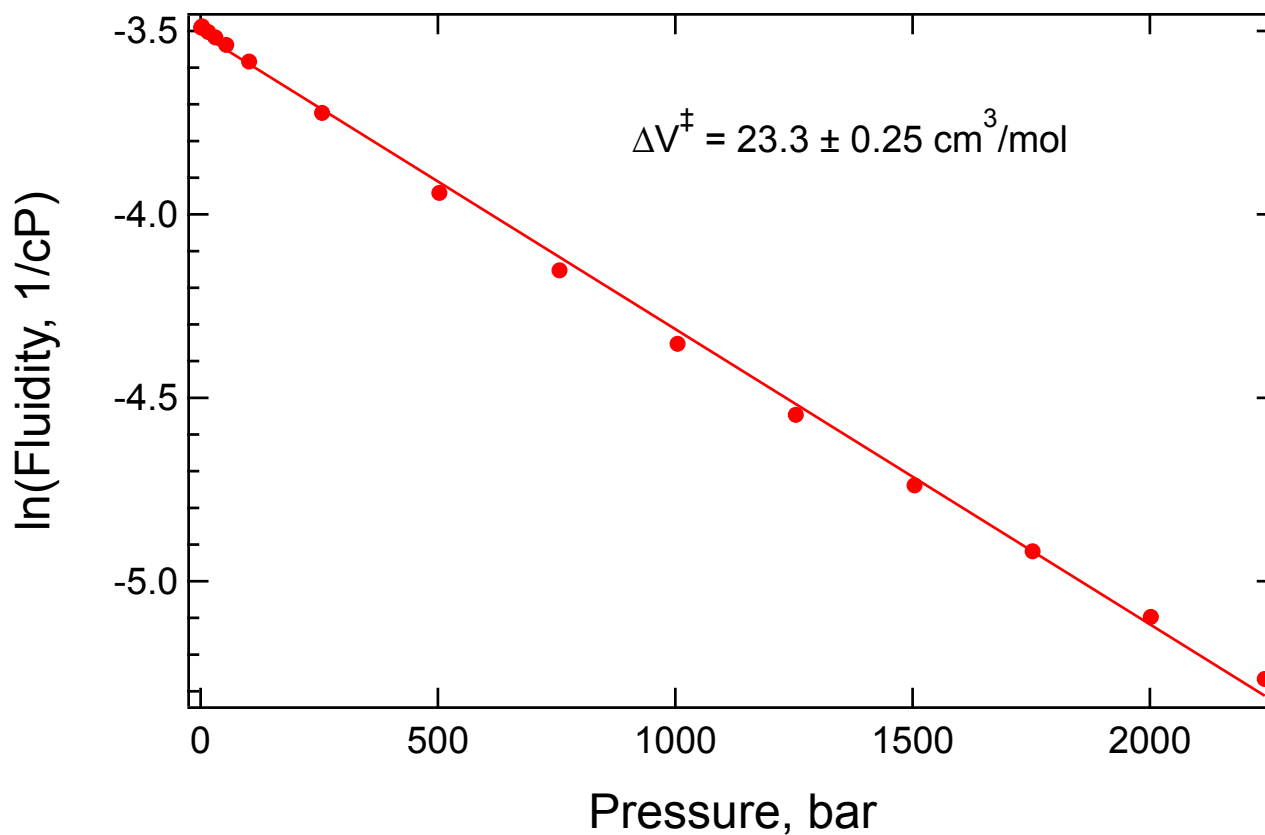

| Point | Pressure | Visc, cP | ln(Fluidity) |
|-------|----------|----------|--------------|
| 0     | 1        | 32.8     | -3.490       |
| 1     | 3        | 32.7     | -3.487       |
| 2     | 16       | 33.2     | -3.503       |
| 3     | 31       | 33.7     | -3.517       |
| 4     | 54       | 34.4     | -3.538       |
| 5     | 102      | 36       | -3.584       |
| 6     | 256      | 41.4     | -3.723       |
| 7     | 503      | 51.5     | -3.942       |
| 8     | 756      | 63.6     | -4.153       |
| 9     | 1005     | 77.7     | -4.353       |
| 10    | 1254     | 94.3     | -4.546       |
| 11    | 1504     | 114.3    | -4.739       |
| 12    | 1753     | 136.8    | -4.919       |
| 13    | 2002     | 163.6    | -5.097       |
| 14    | 2242     | 193.7    | -5.266       |

# 1/Viscosity vs. Pressure Plot for OMIM PF<sub>6</sub> at 20 °C

Data from Tomida et al. 10.1021/je060464y

J. Chem. Eng. Data 2007, 52, 577-579

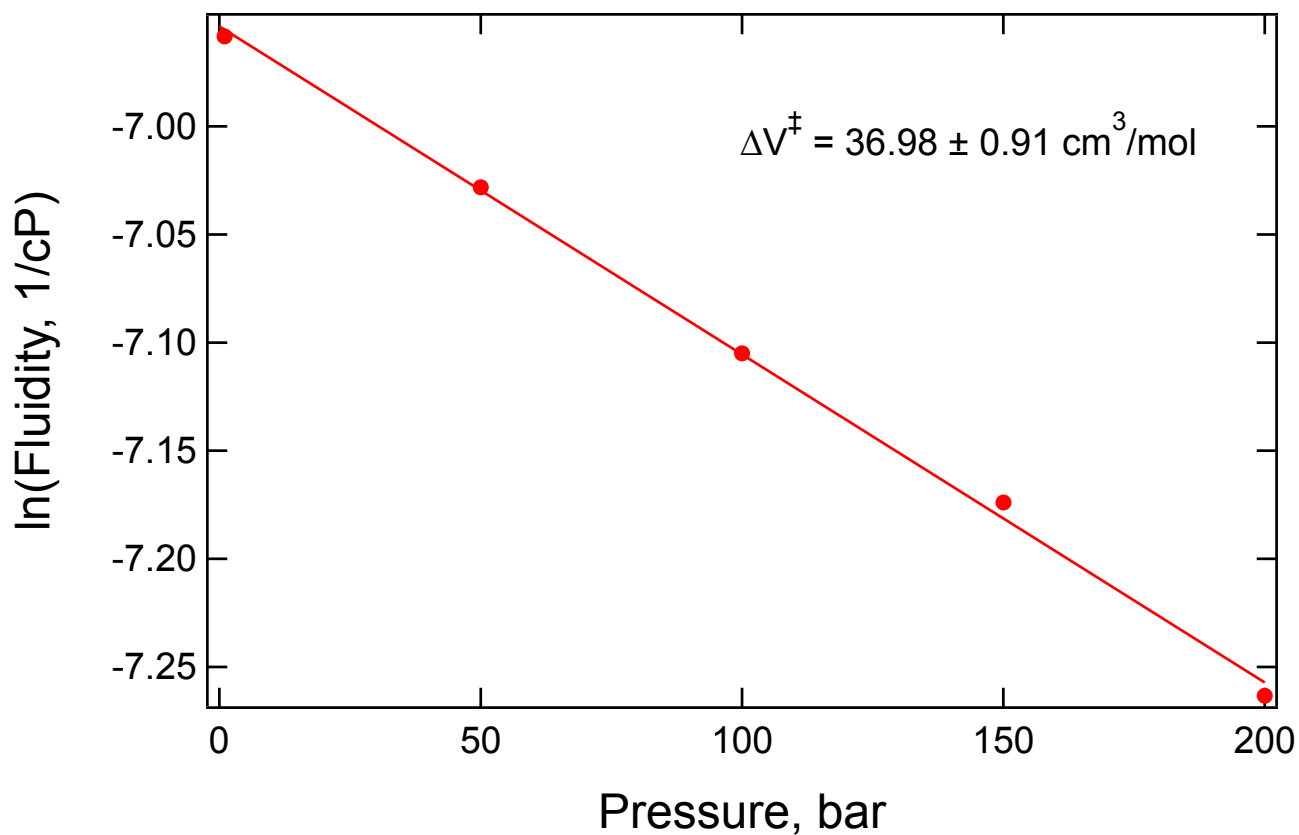

| Point | Pressure | Visc, cP | ln(Fluidity) |
|-------|----------|----------|--------------|
| 0     | 1        | 1052     | -6.958       |
| 1     | 50       | 1128     | -7.028       |
| 2     | 100      | 1218     | -7.105       |
| 3     | 150      | 1305     | -7.174       |
| 4     | 200      | 1427     | -7.263       |

# 1/Viscosity vs. Pressure Plot for OMIM PF<sub>6</sub> at 25 °C

Data from Harris et al. 10.1021/je060082s

J. Chem. Eng. Data 2006, 51, 1161-1167

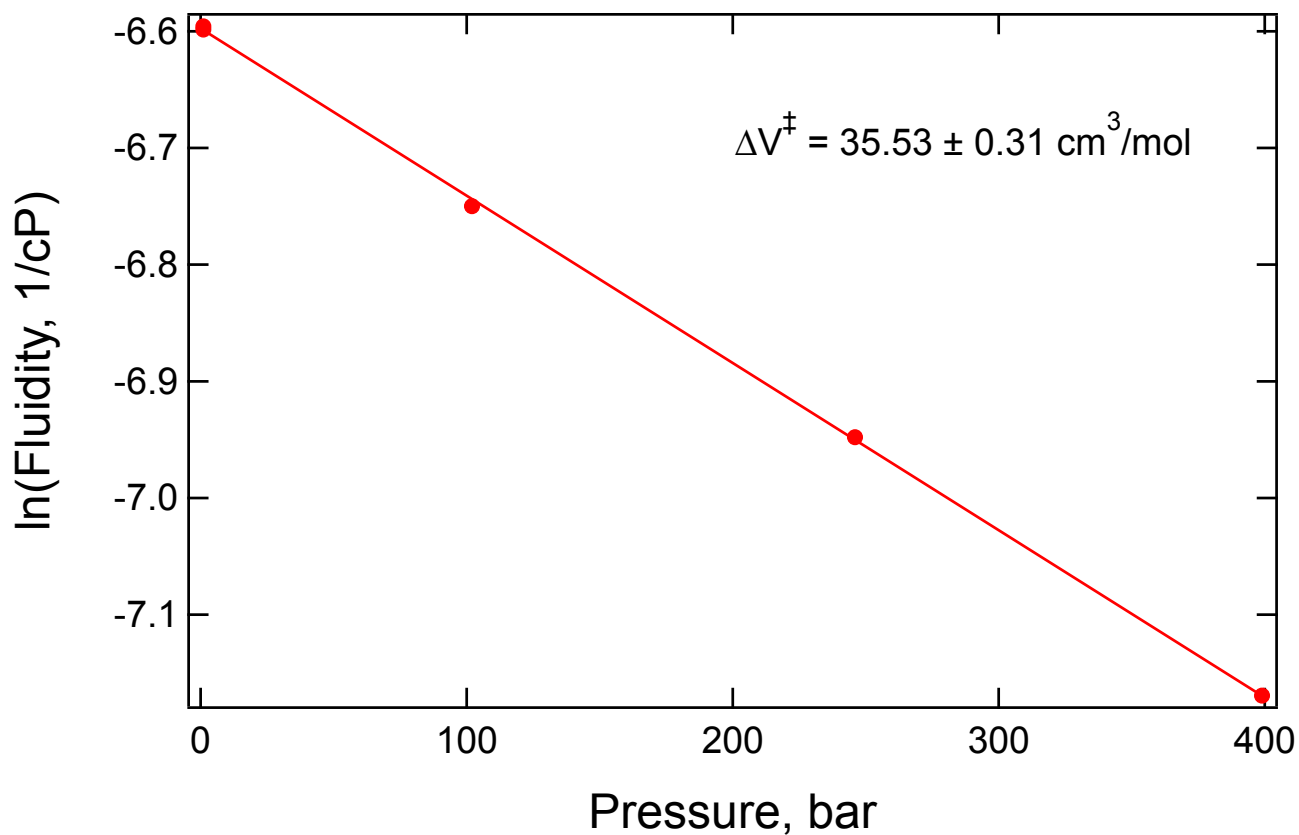

| Point | Pressure | Visc, cP | ln(Fluidity) |
|-------|----------|----------|--------------|
| 0     | 1        | 734      | -6.599       |
| 1     | 1        | 732      | -6.596       |
| 2     | 102      | 854      | -6.750       |
| 3     | 246      | 1041     | -6.948       |
| 4     | 399      | 1299     | -7.169       |

# 1/Viscosity vs. Pressure Plot for OMIM PF<sub>6</sub> at 35 °C

Data from Harris et al. 10.1021/je060082s

J. Chem. Eng. Data 2006, 51, 1161-1167

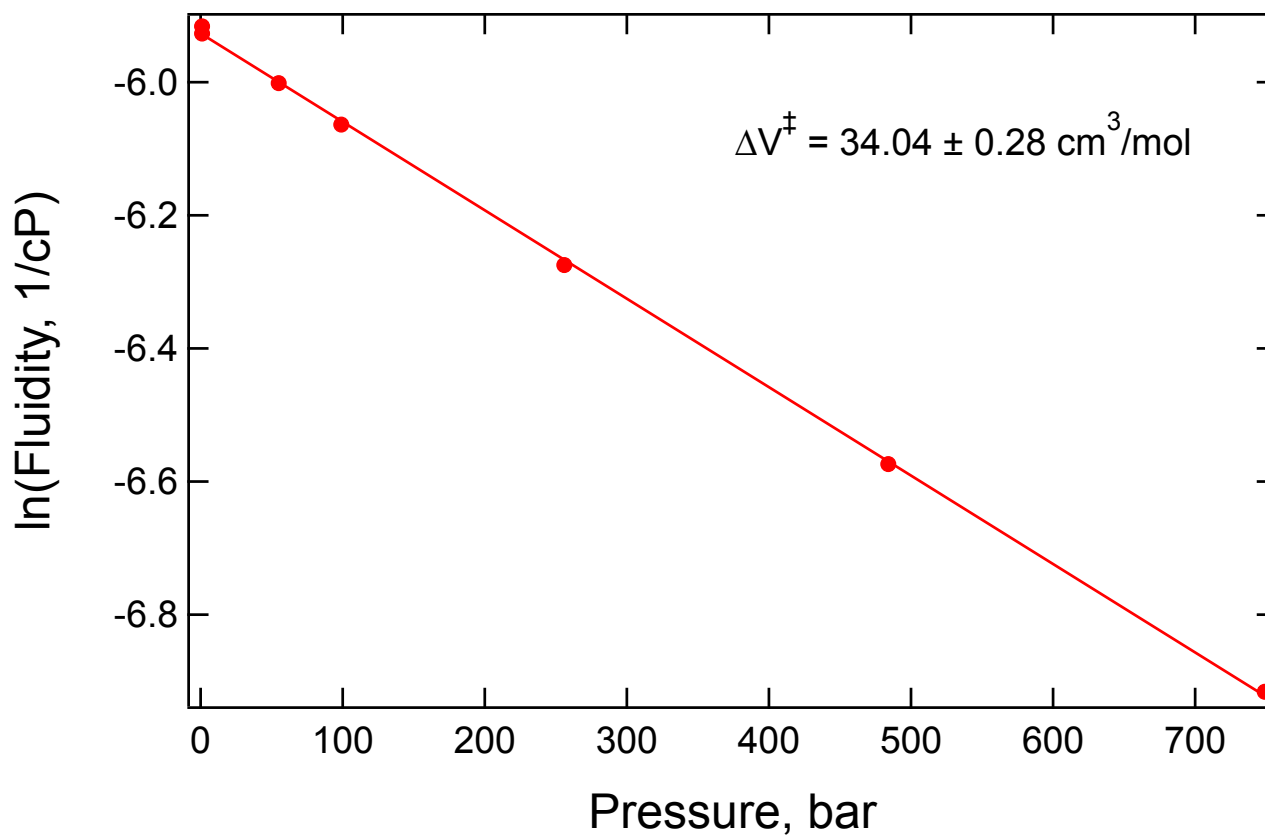

| Point | Pressure | Visc, cP | ln(Fluidity) |
|-------|----------|----------|--------------|
| 0     | 1        | 375      | -5.927       |
| 1     | 1        | 371      | -5.916       |
| 2     | 55       | 404      | -6.001       |
| 3     | 99       | 430      | -6.064       |
| 4     | 256      | 531      | -6.275       |
| 5     | 484      | 716      | -6.574       |
| 6     | 749      | 1008     | -6.916       |

# 1/Viscosity vs. Pressure Plot for OMIM PF<sub>6</sub> at 40 °C

Data from Tomida et al. 10.1021/je060464y

J. Chem. Eng. Data 2007, 52, 577-579

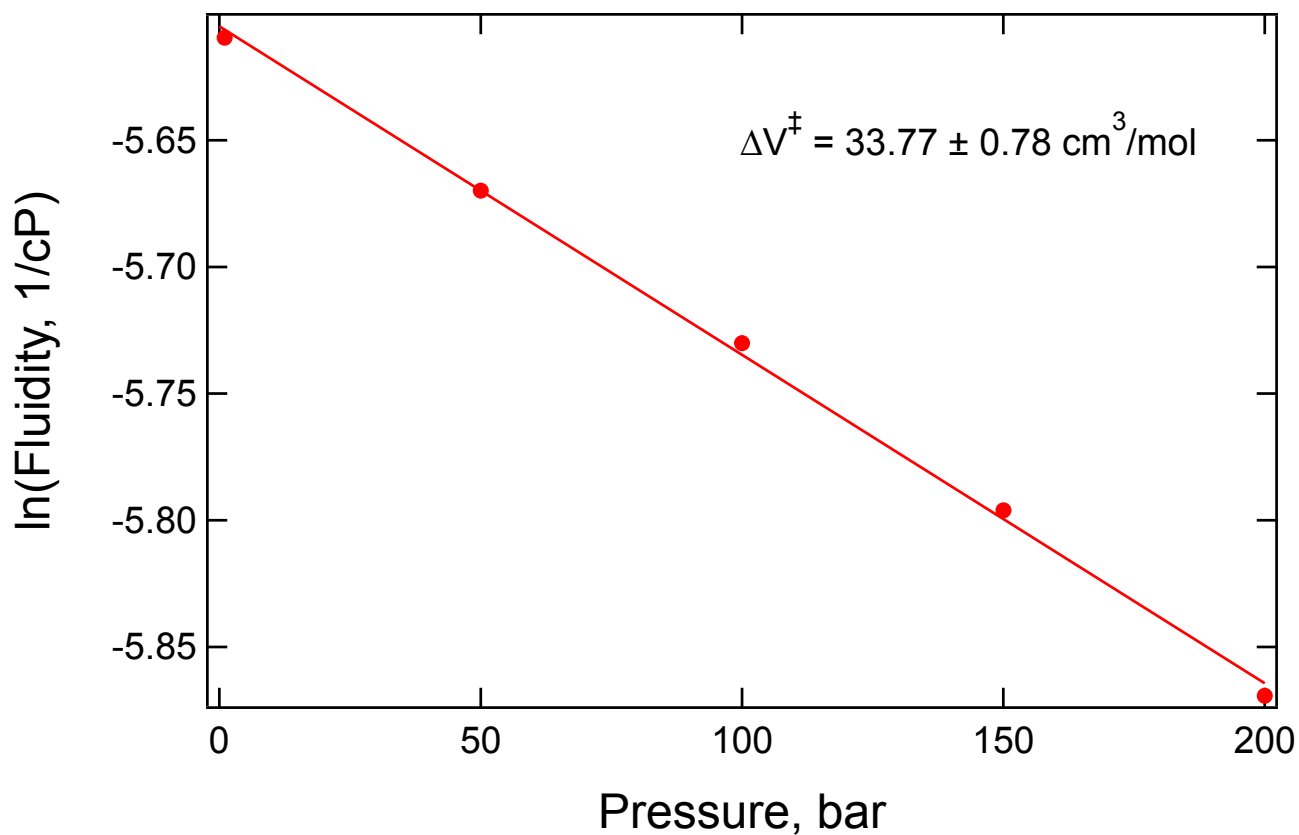

| Point | Pressure | Visc, cP | ln(Fluidity) |
|-------|----------|----------|--------------|
| 0     | 1        | 273      | -5.609       |
| 1     | 50       | 290      | -5.670       |
| 2     | 100      | 308      | -5.730       |
| 3     | 150      | 329      | -5.796       |
| 4     | 200      | 354      | -5.869       |

# 1/Viscosity vs. Pressure Plot for OMIM PF<sub>6</sub> at 60 °C

Data from Harris et al. 10.1021/je060082s

J. Chem. Eng. Data 2006, 51, 1161-1167

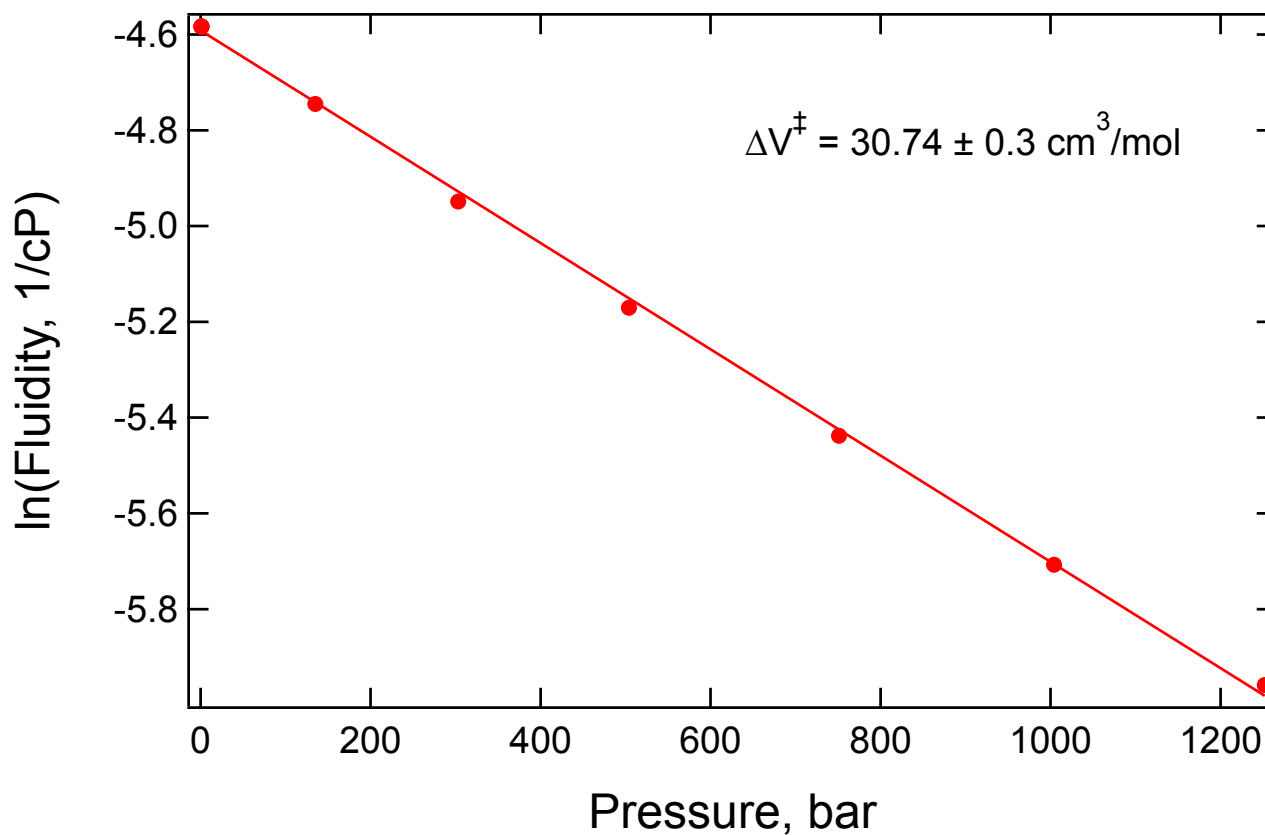

| Point | Pressure | Visc, cP | ln(Fluidity) |
|-------|----------|----------|--------------|
| 0     | 1        | 97.9     | -4.584       |
| 1     | 1        | 97.8     | -4.583       |
| 2     | 1        | 97.9     | -4.584       |
| 3     | 1        | 97.8     | -4.583       |
| 4     | 135      | 115      | -4.745       |
| 5     | 303      | 141      | -4.949       |
| 6     | 504      | 176      | -5.170       |
| 7     | 751      | 230      | -5.438       |
| 8     | 1004     | 301      | -5.707       |
| 9     | 1252     | 387      | -5.958       |

# 1/Viscosity vs. Pressure Plot for OMIM PF<sub>6</sub> at 60 °C

Data from Tomida et al. 10.1021/je060464y

J. Chem. Eng. Data 2007, 52, 577-579

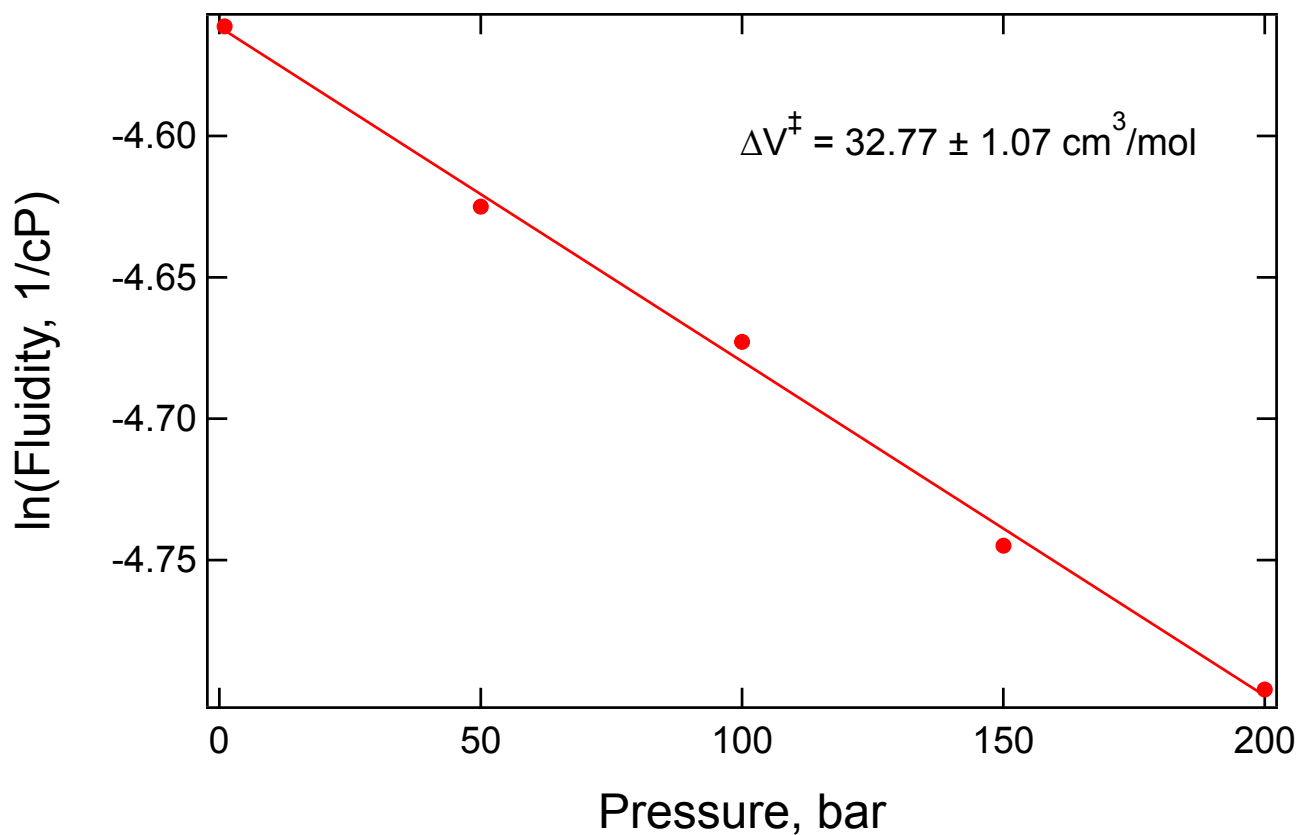

| Point | Pressure | Visc, cP | ln(Fluidity) |
|-------|----------|----------|--------------|
| 0     | 1        | 95.7     | -4.561       |
| 1     | 50       | 102      | -4.625       |
| 2     | 100      | 107      | -4.673       |
| 3     | 150      | 115      | -4.745       |
| 4     | 200      | 121      | -4.796       |



# 1/Viscosity vs. Pressure Plot for OMIM PF<sub>6</sub> at 70 °C

Data from Harris et al. 10.1021/je060082s

J. Chem. Eng. Data 2006, 51, 1161-1167

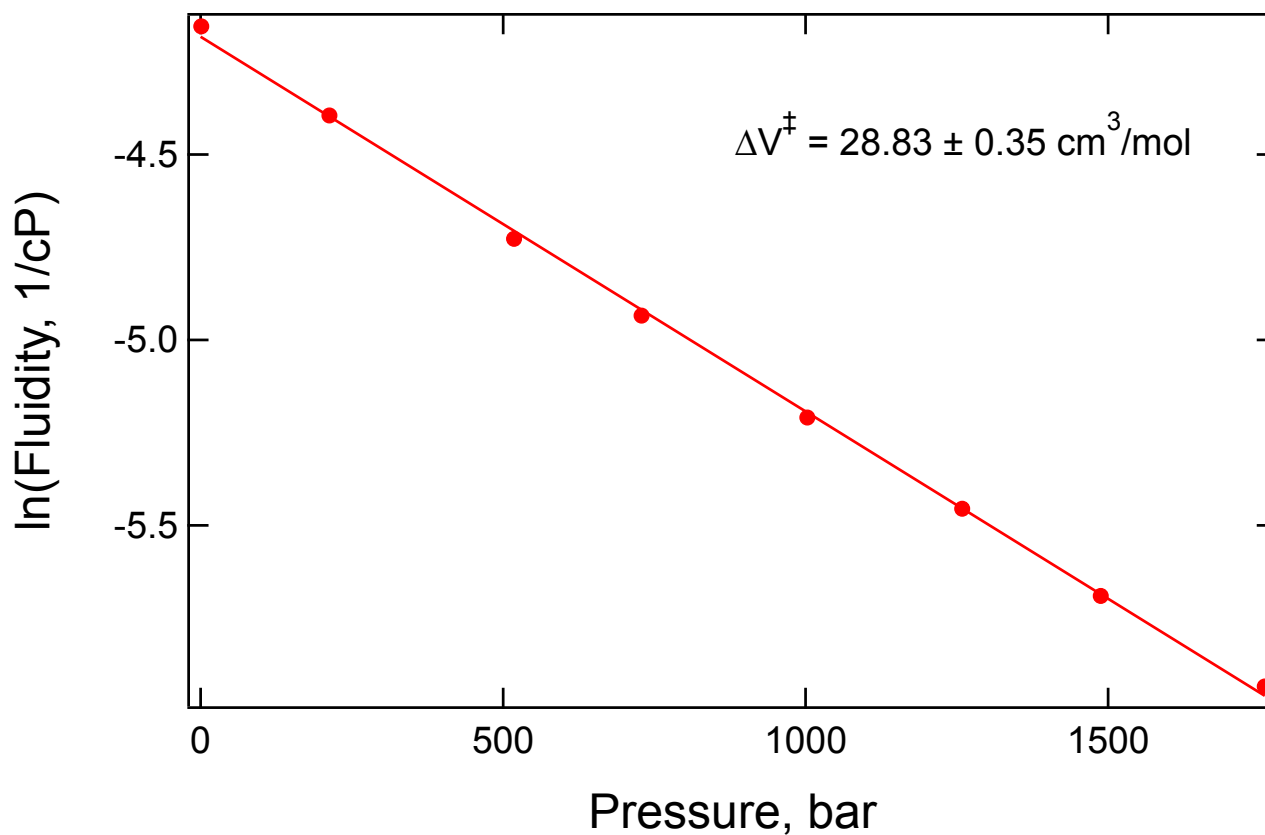

| Point | Pressure | Visc, cP | ln(Fluidity) |
|-------|----------|----------|--------------|
| 0     | 1        | 63.7     | -4.154       |
| 1     | 213      | 81       | -4.394       |
| 2     | 518      | 113      | -4.727       |
| 3     | 729      | 139      | -4.934       |
| 4     | 1003     | 183      | -5.209       |
| 5     | 1259     | 234      | -5.455       |
| 6     | 1488     | 296      | -5.690       |
| 7     | 1759     | 378      | -5.935       |

# 1/Viscosity vs. Pressure Plot for OMIM PF<sub>6</sub> at 80 °C

Data from Tomida et al. 10.1021/je060464y

J. Chem. Eng. Data 2007, 52, 577-579

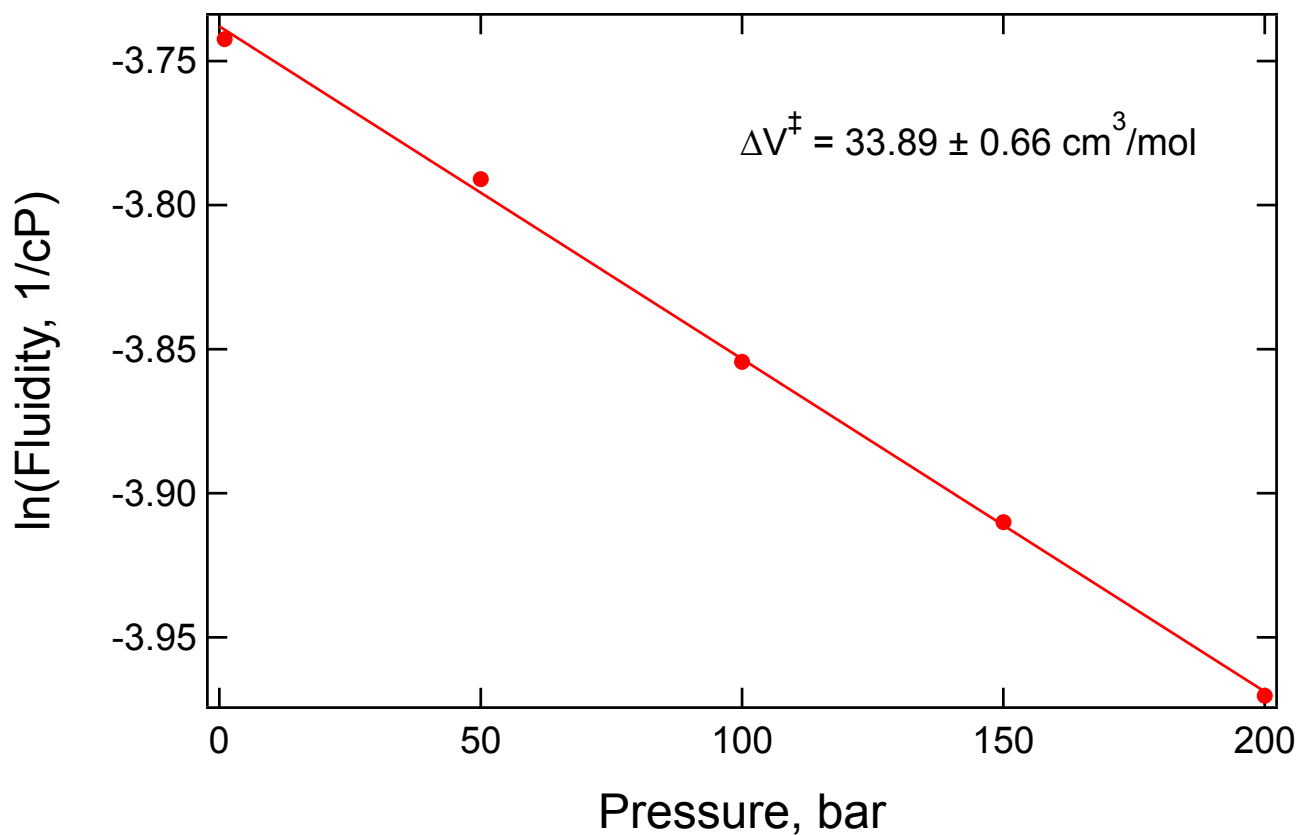

| Point | Pressure | Visc, cP | ln(Fluidity) |
|-------|----------|----------|--------------|
| 0     | 1        | 42.2     | -3.742       |
| 1     | 50       | 44.3     | -3.791       |
| 2     | 100      | 47.2     | -3.854       |
| 3     | 150      | 49.9     | -3.910       |
| 4     | 200      | 53       | -3.970       |
